# Supplementary material
Source: PubMed Central journal article supplement (PMC4411184)
Supplement: NIHMS683460-supplement-Supporting_Information.pdf [file NIHMS683460-supplement-Supporting_Information.pdf]

## Supporting Information

### Asymmetric Total Syntheses of Megacerotonic Acid and Shimobashiric Acid A

Scott W. Krabbe and Jeffrey S. Johnson\*

Department of Chemistry, University of North Carolina at Chapel Hill, Chapel Hill, North Carolina  
27599-3290

[jsj@unc.edu](mailto:jsj@unc.edu)

| Table of Contents                                                                                               | Page |
|-----------------------------------------------------------------------------------------------------------------|------|
| General Information                                                                                             | S2   |
| Preparation of <b>L1</b>                                                                                        | S3   |
| Preparation of Enones <b>13a-d, S1</b>                                                                          | S3   |
| General Procedure A for Preparation of $\beta$ -Substituted- $\alpha,\delta$ -Diketo Esters <b>12a-d</b>        | S5   |
| General Procedure B for Preparation of Racemic $\delta$ -Keto- $\alpha$ -Hydroxy Esters ( $\pm$ )- <b>14a-d</b> | S7   |
| General Procedure C for Preparation of Enantioenriched $\delta$ -Keto- $\alpha$ -Hydroxy Esters <b>14a-d</b>    | S8   |
| General Procedure D for Preparation of $\delta$ -Keto- $\alpha$ -Carboxy Imidazoles <b>15a-d</b>                | S10  |
| General Procedure E for Preparation of $\beta$ -Keto- $\gamma$ -Butyrolactones <b>9a-d</b>                      | S12  |
| General Procedure F for Reduction of $\beta$ -Keto- $\gamma$ -Butyrolactones to give <b>8a-d</b>                | S15  |
| Preparation of $\alpha$ -Benzylidene- $\gamma$ -Butyrolactone <b>6a</b>                                         | S17  |
| General Procedure G for Preparation of $\alpha$ -Benzylidene- $\gamma$ -Butyrolactones <b>6b-d</b>              | S17  |
| Epimerization/Hydrolysis of $\alpha$ -Benzylidene- $\gamma$ -Butyrolactone <b>16a</b>                           | S19  |
| Preparation of Megacerotonic Acid <b>1a</b>                                                                     | S19  |
| Comparison of Physicochemical Properties for Natural and Synthetic <b>1a</b>                                    | S21  |
| Hydrolysis of <i>Tert</i> -Butoxycarbonyl $\alpha$ -Benzylidene- $\gamma$ -Butyrolactone to give <b>S2</b>      | S22  |
| Epimerization/Hydrolysis of $\alpha$ -Benzylidene- $\gamma$ -Butyrolactone <b>16b</b>                           | S22  |
| Preparation of Shimobashiric Acid A <b>1b</b>                                                                   | S23  |
| Comparison of Physicochemical Properties for Natural and Synthetic <b>1b</b>                                    | S24  |
| Preparation of $\gamma$ -Butyrolactone <b>4</b>                                                                 | S25  |
| Preparation of $\gamma$ -Butyrolactone <b>5</b>                                                                 | S26  |
| Preparation of $\alpha$ -Methylidene- $\gamma$ -Butyrolactone <b>2</b>                                          | S26  |
| Preparation of $\alpha$ -Benzylidene- $\gamma$ -Butyrolactone <b>6a</b> Via Heck Coupling                       | S27  |
| Attempt 1 at Preparation of $\alpha$ -Benzylidene- $\gamma$ -Butyrolactone <b>6a</b> Via Cross Metathesis       | S27  |
| Attempt 2 at Preparation of $\alpha$ -Benzylidene- $\gamma$ -Butyrolactone <b>6a</b> Via Cross Metathesis       | S27  |
| Preparation of $\gamma$ -Butyrolactone <b>7</b>                                                                 | S28  |
| Preparation of $\gamma$ -Butyrolactone <b>8a</b> Via Aldol Reaction                                             | S28  |
| Preparation of $\alpha$ -Benzylidene- $\gamma$ -Butyrolactone <b>6a</b> via Elimination                         | S29  |
| References                                                                                                      | S29  |
| $^1\text{H}$ , $^{13}\text{C}$ , and NOESY NMR Spectra                                                          | S30  |
| Mixed NMR Analysis of Authentic and Synthetic <b>1b</b>                                                         | S80  |
| SFC and HPLC Traces                                                                                             | S81  |

## **General Information**

**Methods:** Infrared (IR) spectra were obtained using a Jasco 260 Plus Fourier transform infrared spectrometer. Proton and carbon nuclear magnetic resonance spectra ( $^1\text{H}$  NMR and  $^{13}\text{C}$  NMR) were recorded on a Bruker DRX 400 or 600 ( $^1\text{H}$  NMR at 400 MHz or 600 MHz and  $^{13}\text{C}$  NMR at 100 or 150 MHz) spectrometer with solvent resonance as the internal standard ( $^1\text{H}$  NMR:  $\text{CDCl}_3$  at 7.26 ppm, acetone- $d_6$  at 2.05 ppm, methanol- $d_4$  at 3.30 ppm,  $\text{D}_2\text{O}$  at 4.79 ppm;  $^{13}\text{C}$  NMR:  $\text{CDCl}_3$  at 77.0 ppm, acetone- $d_6$  at 29.8 ppm, methanol- $d_4$  at 49.0) or tetramethylsilane as the internal standard at 0.00 ppm.  $^1\text{H}$  NMR data are reported as follows: chemical shift, multiplicity (s = singlet, bs = broad singlet, d = doublet, dd = doublet of doublet, dt = doublet of triplets, ddd = doublet of doublet of doublets, t = triplet, q = quartet, m = multiplet), coupling constants (Hz), and integration. Supercritical fluid chromatography was performed on a Berger SFC system equipped with Chiralcel AD, AS, OD, and WO columns ( $\phi$  4.6 mm x 250 mm). Samples were eluted with SFC grade  $\text{CO}_2$  at the indicated percentage of MeOH with an oven temperature of 40 °C. HPLC analysis was performed on an Agilent Technologies 1200 System equipped with Chiralpak IA, IB, and IC columns (constant flow at 1.00 mL/min). Optical rotations were measured using a 2 mL cell with a 1 dm path length on a Jasco DIP 1000 digital polarimeter. Mass spectra were obtained using a Thermo Scientific LTQ FT Ultra instrument with electrospray ionization (Note: All samples prepared in methanol with ammonium acetate, formic acid, or cesium acetate additives). Melting point data was collected on a Thomas Hoover Capillary Melting Point Apparatus and are uncorrected. Analytical thin layer chromatography (TLC) was performed on Sorbent Technologies Silica G 0.20 mm silica gel plates. Visualization was accomplished with UV light, aqueous basic potassium permanganate solution, or Seebach's TLC stain followed by heating. Flash chromatography was performed using Silia-P flash silica gel (40-63  $\mu\text{m}$ ) purchased from Silicycle. Yield refers to isolated yield of analytically pure material unless otherwise noted.

**Materials:** Triethylamine ( $\text{Et}_3\text{N}$ ) and *tert*-amyl alcohol (*t*-AmylOH) were freshly distilled from calcium hydride prior to use. Sodium *tert*-amylate ( $\text{NaO}^t\text{Amyl}$ ) solution was prepared by reaction of sodium metal (cut into thin strips) with freshly distilled *tert*-amyl alcohol at 50 °C. Dichloromethane ( $\text{CH}_2\text{Cl}_2$ ), diethyl ether ( $\text{Et}_2\text{O}$ ), tetrahydrofuran (THF), and toluene were dried by passage through a column of neutral alumina under nitrogen prior to use. Ethyl glyoxylate was purchased from Sigma Aldrich or Alfa Aesar and distilled according to a literature procedure immediately before use (the concentration after distillation was determined by  $^1\text{H}$  NMR spectroscopy).<sup>1</sup> (*R,R*)-1,2-di(naphthyl)-1,2-ethanediamine-dihydrochloride salt<sup>2</sup> and *m*-terphenyl sulfonyl chloride<sup>3</sup> were prepared according to literature procedures. All other reagents were purchased from commercial sources and used as received unless otherwise noted. Anhydrous dimethylformamide (DMF) and dimethylsulfoxide (DMSO) were purchased from Sigma Aldrich or Fisher Scientific.

### Preparation of (*R,R*)-*N*-(2-amino-1,2-di(naphthalene-1-yl)ethyl)-[*m*-terphenyl]-2'-sulfonamide, L1

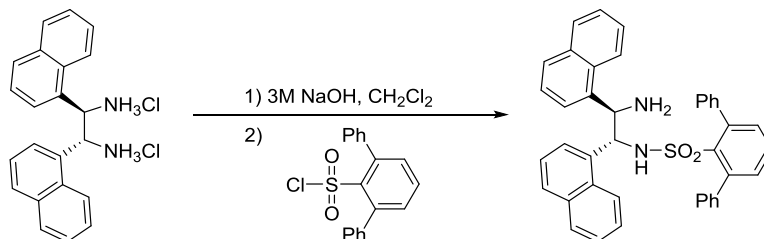

To a 100 mL round-bottomed flask equipped with oversized magnetic stir bar containing 3M NaOH (18 mL) and dichloromethane (18 mL) was added (*R,R*)-1,2-di(naphthalen-1-yl)ethane-1,2-diamine-dihydrochloride salt (1.38 g, 3.58 mmol, 1.0 equiv). The resulting mixture was stirred vigorously for 14 h. The reaction was cooled to 0 °C and *m*-terphenyl sulfonyl chloride (1.18 g, 3.58 mmol, 1.0 equiv) was added. The reaction was allowed to warm to room temperature over 30 min. After 1.5 h at room temperature, the reaction was diluted with water (15 mL) and extracted with ethyl acetate (2 x 20 mL). The combined organic extracts were washed with brine, dried (Na<sub>2</sub>SO<sub>4</sub>) and concentrated. Flash chromatography (50% EtOAc/hexanes) provided **L1** (1.04 g, 1.72 mmol, 48%) as an off-white solid. Analytical data for **L1** matched that previously reported.<sup>3</sup>

### Preparation of Enone 13a

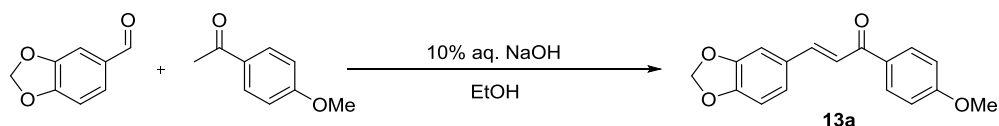

To a solution of piperonal (12.29 g, 81.9 mmol, 1.0 equiv) and 4'-methoxyacetophenone (12.29 g, 81.9 mmol, 1.0 equiv) in ethanol (40 mL) was added 10% aqueous sodium hydroxide (2.4 mL). After 22 h, the yellow suspension was diluted with ethanol/water (50/50, 50 mL). Suction filtration and washing with ethanol/water (50/50, 150 mL) provided **13a** (22.7 g, 80.3 mmol, 98% yield) as a yellow solid. Analytical data for **13a**: <sup>1</sup>H NMR (600 MHz, CDCl<sub>3</sub>): δ 8.06 – 7.96 (m, 2H), 7.72 (d, *J* = 15.5 Hz, 1H), 7.38 (d, *J* = 15.5 Hz, 1H), 7.16 (d, *J* = 1.7 Hz, 1H), 7.14 – 7.09 (m, 1H), 6.97 (d, *J* = 8.8 Hz, 2H), 6.83 (d, *J* = 8.0 Hz, 1H), 6.02 (s, 2H), 3.88 (s, 3H).; <sup>13</sup>C NMR (150 MHz, CDCl<sub>3</sub>) δ 188.5, 163.3, 149.7, 148.3, 143.8, 131.2, 130.7, 129.5, 125.0, 119.8, 113.8, 108.6, 106.6, 101.6, 55.5; IR (thin film, cm<sup>-1</sup>): 1652, 1602, 1506, 1036; m.p. 130-131 °C; TLC (20% EtOAc/hexanes) R<sub>f</sub> : 0.22; HRMS (ESI): Calculated for [M+H]<sup>+</sup> C<sub>17</sub>H<sub>15</sub>O<sub>4</sub>: 283.0970, Found: 283.0965.

### Preparation of Enone **S1**

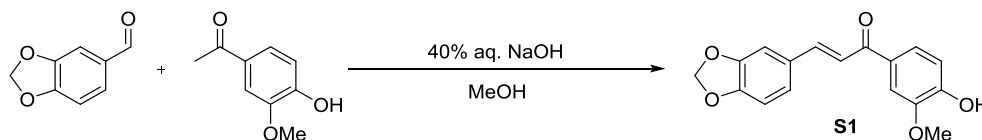

To a solution of piperonal (750 mg, 5.0 mmol, 1.0 equiv) and acetovanillone (830 mg, 5.0 mmol, 1.0 equiv) in methanol (15 mL) was added 40% aqueous sodium hydroxide (5 mL). After 25 h, the reaction was diluted with water (20 mL) and brought to pH = 0 with concentrated hydrochloric acid resulting in warming of the reaction solution. After cooling to room temperature and stirring for 4.5 h, suction filtration provided **S1** (692 mg, 2.3 mmol, 46% yield) as a bright yellow solid. Analytical data for **S1** matched that previously reported.<sup>4</sup>

### Preparation of Enone **13c**

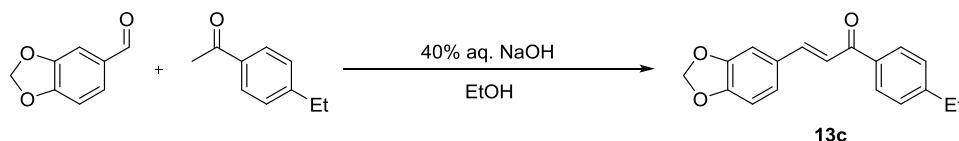

To a solution of piperonal (2.25 g, 15.0 mmol, 1.0 equiv) and 4'-ethylacetophenone (2.22 g, 15.0 mmol, 1.0 equiv) in ethanol (40 mL) was added 40% aqueous sodium hydroxide (1.5 mL). After 15 h, the yellow suspension was diluted with water (30 mL). Suction filtration and washing with ethanol/water (50/50, 40 mL) provided **13c** (3.95 g, 14.1 mmol, 94% yield) as a yellow solid. Analytical data for **13c**: <sup>1</sup>H NMR (600 MHz, CDCl<sub>3</sub>) δ 7.98 – 7.93 (m, 2H), 7.73 (d, *J* = 15.6 Hz, 1H), 7.38 (d, *J* = 15.5 Hz, 1H), 7.34 – 7.30 (m, 2H), 7.17 (d, *J* = 1.7 Hz, 1H), 7.12 (dd, *J* = 8.0, 1.7 Hz, 1H), 6.85 (d, *J* = 8.0 Hz, 1H), 6.03 (s, 2H), 2.73 (q, *J* = 7.6 Hz, 2H), 1.28 (t, *J* = 7.6 Hz, 3H); <sup>13</sup>C NMR (150 MHz, CDCl<sub>3</sub>): δ 189.9, 149.8, 149.6, 148.4, 144.2, 136.0, 129.5, 128.6, 128.1, 125.1, 120.2, 108.6, 106.6, 101.6, 29.0, 15.2; IR (thin film, cm<sup>-1</sup>): 1652, 1580, 1500, 1362, 991; m.p. 105-106 °C; TLC (20% EtOAc/hexanes) R<sub>f</sub>: 0.38; HRMS (ESI): Calculated for [M+H]<sup>+</sup> C<sub>18</sub>H<sub>17</sub>O<sub>3</sub>: 281.1178, Found: 281.1173.

### Preparation of Enone **13d**

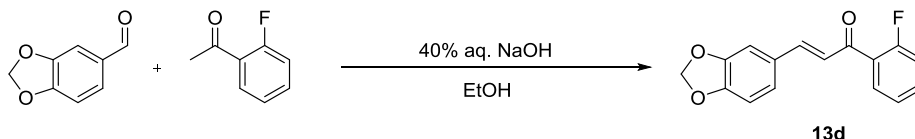

To a solution of piperonal (1.50 g, 9.99 mmol, 1.0 equiv) and 2'-fluoroacetophenone (1.38 g, 9.99 mmol, 1.0 equiv) in ethanol (15 mL) was added 40% aqueous sodium hydroxide (1 mL). After 5 h, the yellow suspension was diluted with water (45 mL). Suction filtration provided **13d**

(2.56 g, 9.47 mmol, 95% yield) as a yellow solid. Analytical data for **13d**:  $^1\text{H NMR}$  (600 MHz,  $\text{CDCl}_3$ ):  $\delta$  7.80 (td,  $J = 7.5, 1.9$  Hz, 1H), 7.66 (dd,  $J = 15.7, 1.8$  Hz, 1H), 7.51 (dddd,  $J = 8.3, 7.1, 5.0, 1.8$  Hz, 1H), 7.28 – 7.13 (m, 4H), 7.12 – 7.09 (m, 1H), 6.84 (d,  $J = 8.0$  Hz, 1H), 6.02 (s, 2H);  $^{13}\text{C NMR}$  (150 MHz,  $\text{CDCl}_3$ ):  $\delta$  188.9 (d,  $J = 2.4$  Hz), 161.1 (d,  $J = 253.0$  Hz), 150.1, 148.4, 144.8, 133.7 (d,  $J = 8.8$  Hz), 130.9 (d,  $J = 2.7$  Hz), 129.2, 127.3 (d,  $J = 13.4$  Hz), 125.5, 124.5 (d,  $J = 3.4$  Hz), 123.7 (d,  $J = 6.6$  Hz), 116.5 (d,  $J = 23.2$  Hz), 108.7, 106.8, 101.6; **IR** (thin film,  $\text{cm}^{-1}$ ): 1655, 1454, 930, 766; **m.p.** 127-128 °C; **TLC** (20% EtOAc/hexanes)  $R_f$  : 0.35; **HRMS** (ESI): Calculated for  $[\text{M}+\text{H}]^+$   $\text{C}_{16}\text{H}_{12}\text{FO}_3$ : 271.0770, Found: 271.0765.

### Tert-Butoxycarbonylation of Enone 13b

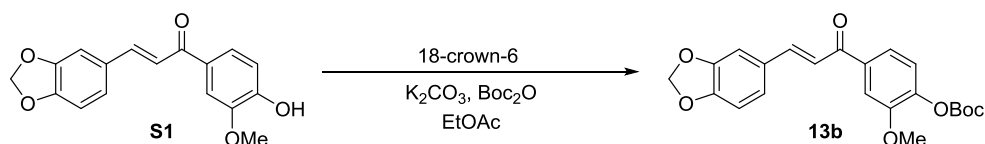

To 50 mL round-bottomed flask equipped with magnetic stir bar containing a semi-solution of enone **S1** (676 mg, 2.27 mmol, 1.0 equiv) and 18-crown-6 (60 mg, 0.23 mmol, 0.10 equiv) in ethyl acetate (10 mL) was added potassium carbonate (471 mg, 3.41 mmol, 1.5 equiv) followed by di-*tert*-butyl dicarbonate (495 mg, 2.27 mmol, 1.0 equiv). The resulting orange suspension was stirred at room temperature. After 27 h, the reaction was partitioned between ethyl acetate (25 mL) and water (25 mL). The aqueous layer was extracted with ethyl acetate (10 mL). The combined organic extracts were washed with brine (15 mL), dried ( $\text{Na}_2\text{SO}_4$ ) and concentrated to provide **13b** (904 mg, 2.27 mmol, 100% yield) as a crystalline, yellow solid. Analytical data for **13b**:  $^1\text{H NMR}$  (600 MHz,  $\text{CDCl}_3$ ):  $\delta$  7.74 (d,  $J = 15.5$  Hz, 1H), 7.64 (d,  $J = 1.9$  Hz, 1H), 7.60 (dd,  $J = 8.2, 1.9$  Hz, 1H), 7.33 (d,  $J = 15.5$  Hz, 1H), 7.24 (d,  $J = 8.2$  Hz, 1H), 7.16 (d,  $J = 1.7$  Hz, 1H), 7.12 (dd,  $J = 8.2, 1.7$  Hz, 1H), 6.85 (d,  $J = 8.0$  Hz, 1H), 6.03 (s, 2H), 3.94 (s, 3H), 1.56 (s, 9H);  $^{13}\text{C NMR}$  (150 MHz,  $\text{CDCl}_3$ )  $\delta$  189.0, 151.6, 150.8, 150.0, 148.4, 144.9, 143.8, 137.0, 129.3, 125.3, 122.3, 121.5, 119.7, 112.1, 108.7, 106.6, 101.6, 83.9, 56.1, 27.6; **IR** (thin film,  $\text{cm}^{-1}$ ): 1761, 1661, 1585, 1506, 805; **m.p.** 141-143 °C; **TLC** (20% EtOAc/hexanes)  $R_f$  : 0.22; **HRMS** (ESI): Calculated for  $[\text{M}+\text{H}]^+$   $\text{C}_{22}\text{H}_{23}\text{O}_7$ : 399.1444, Found: 399.1440.

### General Procedure A for the Preparation of $\beta$ -Substituted- $\alpha,\delta$ -Diketo Esters 12a-d

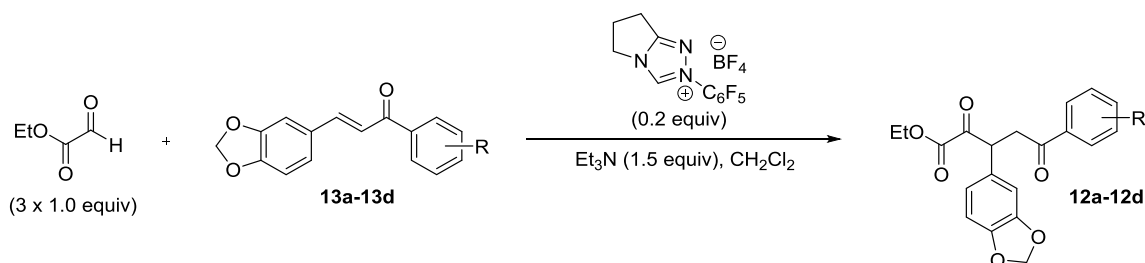

To a flame-dried round-bottomed flask equipped with magnetic stir bar were added enone **13a-d** (1.0 equiv), triazolium salt (0.2 equiv), and freshly distilled ethyl glyoxylate solution (1.0 equiv, ~90% in toluene). The flask was sealed with a rubber septum and purged with nitrogen. Dichloromethane (0.5 M) followed by triethylamine (1.5 equiv) were then added. After 1.5 h and

5 h additional ethyl glyoxylate solution (1.0 equiv, respectively) was added. After 24 h, the reaction was concentrated *in vacuo* and purified by flash chromatography using the indicated solvent system.

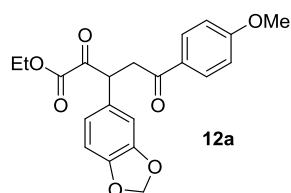

**Ethyl 3-(benzo[d][1,3]dioxol-5-yl)-5-(4-methoxyphenyl)-2,5-dioxopentanoate (12a):** The title compound was prepared according to General Procedure A: enone **13a** (5.00 g, 17.7 mmol), triazolium salt (1.28 g, 3.53 mmol), ethyl glyoxylate (3 x 2.0 g, 3 x 17.7 mmol), dichloromethane (35.3 mL), triethylamine (3.69 mL, 26.5 mmol). Flash chromatography (20-40% EtOAc/hexanes) provided **12a** (6.70 g,

contained 4% enone which could not be efficiently separated) as a clear, viscous oil. This material was reduced in its entirety (*vide infra*). In another experiment an analytically pure sample was obtained by careful selection of a clean fraction. Analytical data for **12a**:  $^1\text{H NMR}$  (600 MHz,  $\text{CDCl}_3$ ):  $\delta$  7.98 – 7.70 (m, 2H), 6.98 – 6.87 (m, 2H), 6.83 (d,  $J$  = 1.7 Hz, 1H), 6.81 – 6.70 (m, 2H), 6.01 – 5.86 (m, 2H), 5.04 (dd,  $J$  = 10.6, 3.9 Hz, 1H), 4.43 – 4.20 (m, 2H), 3.91 (dd,  $J$  = 17.9, 10.6 Hz, 1H), 3.86 (d,  $J$  = 1.6 Hz, 3H), 3.36 (dd,  $J$  = 17.9, 3.9 Hz, 1H), 1.32 (t,  $J$  = 7.2 Hz, 2H).  $^{13}\text{C NMR}$  (150 MHz,  $\text{CDCl}_3$ ):  $\delta$  195.8, 192.0, 163.8, 160.4, 148.2, 147.3, 130.4, 128.9, 128.8, 122.3, 113.7, 109.1, 108.7, 101.2, 62.5, 55.5, 47.8, 42.9, 13.9; **IR** (thin film,  $\text{cm}^{-1}$ ): 2906, 1728, 1670, 1601, 1488, 1171, 1038; **TLC** (30% EtOAc/hexanes)  $R_f$  : 0.29; **HRMS** (ESI): Calculated for  $[\text{M}+\text{Cs}]^+$   $\text{C}_{21}\text{H}_{20}\text{CsO}_7$ : 517.0263, Found: 517.0265.

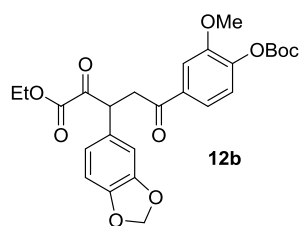

**Ethyl 3-(benzo[d][1,3]dioxol-5-yl)-5-(4-((tert-butoxycarbonyl)oxy)-3-methoxyphenyl)-2,5-dioxopentanoate (12b):** The title compound was prepared according to General Procedure A: enone **13b** (850 mg, 2.13 mmol), triazolium salt (155 mg, 0.426 mmol), ethyl glyoxylate (3 x 242 mg, 3 x 0.426 mmol), dichloromethane (4.2 mL), triethylamine (0.45 mL, 3.2 mmol). Flash chromatography (20-25% EtOAc/hexanes) provided **12b** (1.01 g, 2.02 mmol, 95% yield) as pale yellow solid.

Analytical data for **12b**:  $^1\text{H NMR}$  (600 MHz,  $\text{CDCl}_3$ ):  $\delta$  7.56 – 7.53 (m, 2H), 7.22 – 7.14 (m, 1H), 6.81 (d,  $J$  = 1.5 Hz, 1H), 6.80 – 6.74 (m, 2H), 5.94 (d,  $J$  = 2.6 Hz, 2H), 5.04 (dd,  $J$  = 10.4, 4.0 Hz, 1H), 4.33 – 4.24 (m, 2H), 3.91 (dd,  $J$  = 18.1, 10.4 Hz, 1H), 3.88 (s, 3H), 3.38 (dd,  $J$  = 18.1, 4.0 Hz, 1H), 1.54 (s, 9H), 1.32 (t,  $J$  = 7.2 Hz, 3H);  $^{13}\text{C NMR}$  (150 MHz,  $\text{CDCl}_3$ ):  $\delta$  196.2, 191.8, 160.3, 151.5, 150.6, 148.2, 147.4, 144.4, 134.5, 128.4, 122.4, 122.4, 121.5, 111.5, 109.0, 108.8, 101.2, 84.0, 62.5, 56.0, 47.9, 42.9, 27.5, 13.9; **IR** (thin film,  $\text{cm}^{-1}$ ): 2982, 1762, 1730, 1683, 1506, 1488, 1146, 1039, 738; **m.p.** 108-109 °C **TLC** (30% EtOAc/hexanes)  $R_f$  : 0.29; **HRMS** (ESI): Calculated for  $[\text{M}+\text{H}]^+$   $\text{C}_{26}\text{H}_{29}\text{O}_{10}$ : 501.1761, Found: 501.1758.

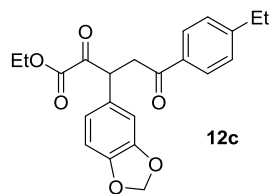

**Ethyl 3-(benzo[d][1,3]dioxol-5-yl)-5-(4-ethylphenyl)-2,5-dioxopentanoate (12c):** The title compound was prepared according to General Procedure A: enone **13c** (3.90 g, 13.9 mmol), triazolium salt (1.01 g, 2.78 mmol), ethyl glyoxylate (3 x 1.58 g, 3 x 13.9 mmol), dichloromethane (28 mL), triethylamine (2.9 mL, 21 mmol). Flash chromatography (10-15% EtOAc/hexanes) provided **12c** (5.30 g, 13.9

mmol, 99% yield) as a viscous yellow oil. Analytical data for **12c**:  $^1\text{H NMR}$  (600 MHz,  $\text{CDCl}_3$ ):  $\delta$  7.87 (d,  $J$  = 8.3 Hz, 2H), 7.28 – 7.26 (d,  $J$  = 8.4 Hz, 2H), 6.83 (d,  $J$  = 1.8 Hz, 1H), 6.81 – 6.73

(m, 2H), 5.94 (d,  $J = 3.0$  Hz, 2H), 5.05 (dd,  $J = 10.5, 3.9$  Hz, 1H), 4.35 – 4.24 (m, 2H), 3.94 (dd,  $J = 18.1, 10.5$  Hz, 1H), 3.39 (dd,  $J = 18.1, 4.0$  Hz, 1H), 2.69 (q,  $J = 7.6$  Hz, 2H), 1.32 (t,  $J = 7.2$  Hz, 3H), 1.24 (t,  $J = 7.6$  Hz, 3H);  $^{13}\text{C}$  NMR (150 MHz,  $\text{CDCl}_3$ ):  $\delta$  197.0, 191.9, 160.4, 150.5, 148.2, 147.3, 133.6, 128.7, 128.4, 128.1, 122.3, 109.1, 108.7, 101.2, 62.5, 47.8, 43.0, 28.9, 15.1, 13.9; IR (thin film,  $\text{cm}^{-1}$ ): 2968, 2935, 2905, 1729, 1678, 1607, 1488, 1038, 766; TLC (30% EtOAc/hexanes)  $R_f$ : 0.28; HRMS (ESI): Calculated for  $[\text{M}+\text{H}]^+$   $\text{C}_{22}\text{H}_{23}\text{O}_6$ : 383.1495, Found: 383.1492.

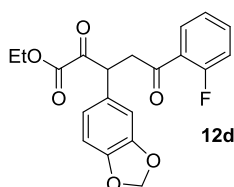

**Ethyl 3-(benzo[d][1,3]dioxol-5-yl)-5-(2-fluorophenyl)-2,5-dioxopentanoate (12d):** The title compound was prepared according to General Procedure A: enone **13d** (500 mg, 1.85 mmol), triazolium salt (134 mg, 0.37 mmol), ethyl glyoxylate (3 x 230 mg, 3 x 1.85 mmol), dichloromethane (3.7 mL), triethylamine (0.39 mL, 2.8 mmol). Flash chromatography (15-20% EtOAc/hexanes) provided **12d** (685 mg, 1.84

mmol, 99% yield) as a viscous yellow oil. Analytical data for **12d**:  $^1\text{H}$  NMR (600 MHz,  $\text{CDCl}_3$ ):  $\delta$  7.86 (td,  $J = 7.6, 1.9$  Hz, 1H), 7.57 – 7.48 (m, 1H), 7.23 – 7.19 (m, 1H), 7.12 (ddd,  $J = 11.3, 8.3, 1.1$  Hz, 1H), 6.80 (d,  $J = 1.7$  Hz, 1H), 6.78 – 6.74 (m, 2H), 5.94 – 5.92 (m, 2H), 5.05 (dd,  $J = 10.8, 3.7$  Hz, 1H), 4.33 – 4.22 (m, 2H), 3.95 (ddd,  $J = 18.9, 10.8, 3.3$  Hz, 1H), 3.39 (dt,  $J = 18.9, 3.6$  Hz, 1H), 1.32 (t,  $J = 7.2$  Hz, 3H);  $^{13}\text{C}$  NMR (150 MHz,  $\text{CDCl}_3$ ):  $\delta$  195.4 (d,  $J = 4.1$  Hz), 191.7, 162.2 (d,  $J = 255.7$  Hz), 160.4, 148.1, 147.4, 135.1 (d,  $J = 9.1$  Hz), 130.6 (d,  $J = 2.3$  Hz), 128.4, 124.5 (d,  $J = 3.3$  Hz), 124.3 (d,  $J = 12.6$  Hz), 122.4, 116.7 (d,  $J = 23.7$  Hz), 109.0, 108.7, 101.2, 62.5, 47.8 (d,  $J = 2.3$  Hz), 47.6 (d,  $J = 8.5$  Hz), 13.9; IR (thin film,  $\text{cm}^{-1}$ ): 2984, 2904, 1739, 1683, 1610, 1487, 1453, 1038, 768; TLC (20% EtOAc/hexanes)  $R_f$ : 0.21; HRMS (ESI): Calculated for  $[\text{M}+\text{H}]^+$   $\text{C}_{20}\text{H}_{18}\text{FO}_6$ : 373.1087, Found: 373.1087.

### **General Procedure B for Preparation of Racemic $\delta$ -Keto- $\alpha$ -Hydroxy Esters ( $\pm$ )-14a-d**

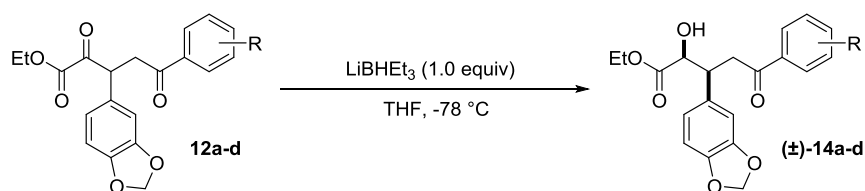

Lithium triethylborohydride (1.0 equiv, 1.0 M solution in THF) was added to a solution of  $\beta$ -substituted  $\alpha,\delta$ -diketo ester **12a-d** (1.0 equiv) in THF (0.5 M concentration) at  $-78$  °C. The reaction was allowed to stir at this temperature for 10 min and quenched with saturated ammonium chloride. The reaction was further diluted with diethyl ether and water. The organic layer was washed with brine, dried over sodium sulfate and concentrated *in vacuo* to give  $\alpha$ -keto  $\delta$ -hydroxy esters **x** which were purified by flash chromatography using the indicated solvent systems.

## General Procedure C for Preparation of Enantioenriched $\delta$ -Keto- $\alpha$ -Hydroxy Esters **14a-d**

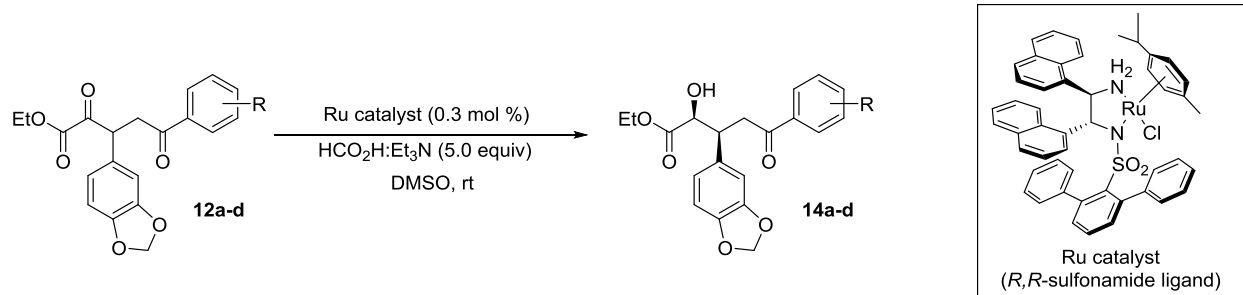

To a flame-dried 20 mL scintillation vial equipped with magnetic stir bar were added [RuCl<sub>2</sub>(*p*-cymene)]<sub>2</sub> (0.3-0.4 mol %) and **L1** (1.2-1.6 mol %). The vial was purged with nitrogen and DMSO (0.01 M) was added. The resulting solution was heated to 70 °C. After 1 h, the red solution was cooled to room temperature and transferred via cannula to a solution of  $\alpha$ -keto ester **12a-d** (1.0 equiv) in DMSO (0.6 M) under nitrogen. Formic acid/triethylamine azeotrope (5:2, 5.0 equiv) was added. After the indicated time period the reaction was diluted with water and extracted with ethyl acetate (2x). The combined organic extracts were washed with brine, dried (Na<sub>2</sub>SO<sub>4</sub>) and concentrated *in vacuo*. The crude product was purified by flash chromatography using the indicated solvent systems.

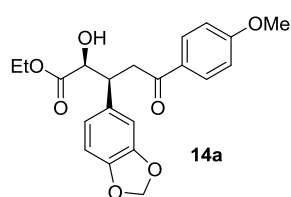

**(2S,3S)-Ethyl 3-(benzo[d][1,3]dioxol-5-yl)-2-hydroxy-5-(4-methoxyphenyl)-5-oxopentanoate (14a):** The title compound was prepared according to General Procedure C: [RuCl<sub>2</sub>(*p*-cymene)]<sub>2</sub> (32.5 mg, 0.053 mmol, 0.3 mol %), **L1** (128 mg, 0.212 mmol, 12 mol %), DMSO (5.3 mL);  $\alpha$ -keto ester **12a** (6.70 g, contained 4% enone from preparation, *vide supra*), DMSO (30 mL), formic acid/triethylamine

azeotrope (5:2, 7.64 mL, 88.4 mmol, 5.0 equiv); 24 h. The diastereomer ratio (>20:1 dr) was determined by <sup>1</sup>H NMR spectroscopic analysis of the crude reaction mixture in which no diastereomer was observed. Flash chromatography provided **14a** (6.31 g, 16.3 mmol, 92% yield over 2 steps, >20:1 dr) as a pale yellow, viscous oil. Analytical data for **14a**: <sup>1</sup>H NMR (600 MHz, CDCl<sub>3</sub>):  $\delta$  7.98 – 7.95 (m, 2H), 6.95 – 6.89 (m, 2H), 6.84 (d, *J* = 1.7 Hz, 1H), 6.75 – 6.67 (m, 2H), 5.90 (q, *J* = 1.6 Hz, 2H), 4.50 (dd, *J* = 6.1, 3.1 Hz, 1H), 4.14 (qq, *J* = 7.4, 3.6 Hz, 2H), 3.86 (s, 4H), 3.62 (dd, *J* = 17.5, 8.1 Hz, 1H), 3.34 (dd, *J* = 17.5, 6.1 Hz, 1H), 2.88 (d, *J* = 6.1 Hz, 1H), 1.26 (t, *J* = 7.2 Hz, 3H); <sup>13</sup>C NMR (150 MHz, CDCl<sub>3</sub>):  $\delta$  196.7, 173.7, 163.5, 147.4, 146.6, 132.7, 130.3, 130.0, 121.8, 113.7, 108.9, 108.0, 100.9, 72.6, 61.8, 55.4, 43.4, 40.2, 14.2; **IR** (thin film, cm<sup>-1</sup>): 3503, 2903, 1733, 1673, 1601, 1506, 1489, 1037; **TLC** (30% EtOAc/hexanes) *R<sub>f</sub>*: 0.19; **HRMS** (ESI): Calculated for [M+H]<sup>+</sup> C<sub>21</sub>H<sub>23</sub>O<sub>7</sub>: 387.1444, Found: 387.1440; **SFC Analysis**: AD column, 20% MeOH, 1.5 mL/min, 150 bar, 210 nm; *t*<sub>major</sub> = 10.1 min, *t*<sub>minor</sub> = 13.5 min, 96:4 er; [ $\alpha$ ]<sub>D</sub><sup>25</sup> -17.9 (*c* = 0.26, MeOH).



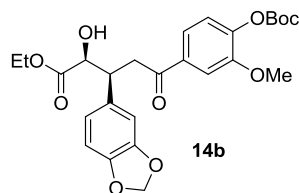

**(2S,3S)-Ethyl 3-(benzo[d][1,3]dioxol-5-yl)-5-(4-((tert-butoxycarbonyl)oxy)-3-methoxyphenyl)-2-hydroxy-5-oxopentanoate (14b):**

The title compound was prepared according to General Procedure C: [RuCl<sub>2</sub>(*p*-cymene)]<sub>2</sub> (14.8 mg, 0.024 mmol, 0.4 mol %), **L1** (58.6 mg, 0.097 mmol, 16 mol %), DMSO (2.4 mL);  $\alpha$ -keto ester **12b** (3.03 g, 6.06 mmol, 1.0 equiv), DMSO (9.7 mL), formic acid/triethylamine azeotrope (5:2, 2.62 mL, 30.3 mmol, 5.0 equiv); 28 h. The diastereomer ratio (>20:1 dr) was determined by <sup>1</sup>H NMR spectroscopic analysis of the crude reaction mixture in which no diastereomer was observed. Flash chromatography provided **14b** (2.92 g, 5.81 mmol, 96%, >20:1 dr) as a sticky, yellow foam. Analytical data for **14b**: <sup>1</sup>H NMR (600 MHz, CDCl<sub>3</sub>):  $\delta$  7.63 – 7.56 (m, 2H), 7.19 (d, *J* = 8.2 Hz, 1H), 6.82 (d, *J* = 1.7 Hz, 1H), 6.74 – 6.67 (m, 2H), 5.90 (s, 2H), 4.49 (dd, *J* = 5.9, 3.1 Hz, 1H), 4.14 (qq, *J* = 7.4, 3.6 Hz, 2H), 3.88 (s, 3H), 3.84 (ddd, *J* = 7.6, 6.4, 3.1 Hz, 1H), 3.61 (dd, *J* = 17.6, 7.7 Hz, 1H), 3.39 (dd, *J* = 17.6, 6.4 Hz, 1H), 2.90 (d, *J* = 6.0 Hz, 1H), 1.54 (s, 9H), 1.25 (t, *J* = 7.2 Hz, 3H); <sup>13</sup>C NMR (150 MHz, CDCl<sub>3</sub>):  $\delta$  197.0, 173.5, 151.4, 150.7, 147.5, 146.7, 144.2, 135.5, 132.4, 122.4, 121.8, 121.4, 111.5, 108.9, 108.0, 100.9, 83.9, 72.6, 61.8, 56.0, 43.4, 40.5, 27.5, 14.2; IR (thin film, cm<sup>-1</sup>): 3503, 2981, 1762, 1684, 1506; TLC (30% EtOAc/hexanes) R<sub>f</sub>: 0.19; HRMS (ESI): Calculated for [M+H]<sup>+</sup> C<sub>26</sub>H<sub>31</sub>O<sub>10</sub>: 503.1917, Found: 503.1921; SFC Analysis: AD column, 15% MeOH, 1.5 mL/min, 150 bar, 210 nm; t<sub>major</sub> = 7.4 min, t<sub>minor</sub> = 8.8 min, 97:3 er; [ $\alpha$ ]<sub>D</sub><sup>25</sup> +3.2 (*c* = 0.34, MeOH).

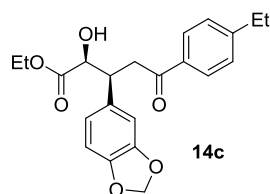

**(2S,3S)-Ethyl 3-(benzo[d][1,3]dioxol-5-yl)-5-(4-ethylphenyl)-2-hydroxy-5-oxopentanoate (14c):**

The title compound was prepared according to General Procedure C: [RuCl<sub>2</sub>(*p*-cymene)]<sub>2</sub> (9.0 mg, 0.015 mmol, 0.3 mol %), **L1** (35.5 mg, 0.059 mmol, 12 mol %), DMSO (1.5 mL);  $\alpha$ -keto ester **12c** (1.87 g, 4.89 mmol, 1.0 equiv), DMSO (8.3 mL), formic acid/triethylamine azeotrope (5:2, 2.12 mL, 24.5 mmol, 5.0 equiv); 22 h. The diastereomer ratio (>20:1 dr) was determined by <sup>1</sup>H NMR spectroscopic analysis of the crude reaction mixture in which no diastereomer was observed. Flash chromatography provided **14c** (1.84 g, 4.79 mmol, 98%, >20:1 dr) as a viscous pale yellow oil. Analytical data for **14c**: <sup>1</sup>H NMR (600 MHz, CDCl<sub>3</sub>):  $\delta$  7.91 (d, *J* = 8.3 Hz, 2H), 7.27 (d, *J* = 8.2 Hz, 2H), 6.84 (d, *J* = 1.7 Hz, 1H), 6.77 – 6.65 (m, 2H), 5.90 (q, *J* = 1.5 Hz, 2H), 4.51 (dd, *J* = 6.1, 3.1 Hz, 1H), 4.15 (qq, *J* = 7.2, 3.6 Hz, 2H), 3.87 (ddd, *J* = 8.0, 6.1, 3.1 Hz, 1H), 3.65 (dd, *J* = 17.7, 8.0 Hz, 1H), 3.38 (dd, *J* = 17.7, 6.1 Hz, 1H), 2.90 (d, *J* = 6.1 Hz, 1H), 2.69 (q, *J* = 7.6 Hz, 2H), 1.25 (td, *J* = 7.4, 6.3 Hz, 6H); <sup>13</sup>C NMR (150 MHz, CDCl<sub>3</sub>):  $\delta$  197.8, 173.7, 150.2, 147.4, 146.6, 134.6, 132.6, 128.3, 128.0, 121.8, 108.9, 108.0, 100.9, 72.6, 61.8, 43.3, 40.5, 28.9, 15.1, 14.2; IR (thin film, cm<sup>-1</sup>): 3502, 2968, 1733, 1683, 1505, 1489, 1038, 813; TLC (30% EtOAc/hexanes) R<sub>f</sub>: 0.28; HRMS (ESI): Calculated for [M+H]<sup>+</sup> C<sub>22</sub>H<sub>25</sub>O<sub>6</sub>: 385.1651, Found: 385.1648; SFC Analysis: AD column, 20% MeOH, 1.5 mL/min, 150 bar, 210 nm; t<sub>major</sub> = 8.6 min, t<sub>minor</sub> = 10.6 min, 97:3 er; [ $\alpha$ ]<sub>D</sub><sup>25</sup> -11.8 (*c* = 0.12, MeOH).

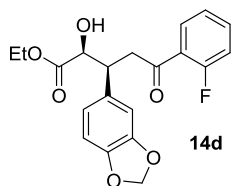

**(2S,3S)-Ethyl 3-(benzo[d][1,3]dioxol-5-yl)-5-(2-fluorophenyl)-2-hydroxy-5-oxopentanoate (14d):**

The title compound was prepared according to General Procedure C: [RuCl<sub>2</sub>(*p*-cymene)]<sub>2</sub> (14.4 mg, 0.023 mmol, 0.3 mol %), **L1** (56.8 mg, 0.094 mmol, 12 mol %), DMSO (2.3 mL);  $\alpha$ -keto ester **12d** (2.91 g, 7.82 mmol, 1.0 equiv), DMSO (13.3 mL), formic acid/triethylamine azeotrope (5:2, 3.38 mL, 39.1 mmol, 5.0 equiv); 23 h. The diastereomer ratio (>20:1 dr) was determined by <sup>1</sup>H NMR spectroscopic analysis of the crude reaction mixture in which no diastereomer was observed. Flash chromatography provided **14d** (2.77 g, 7.40 mmol, 95%, >20:1 dr) as a viscous pale yellow oil. Analytical data for **14d**: <sup>1</sup>H NMR (600 MHz, CDCl<sub>3</sub>):  $\delta$  7.82 (td, *J* = 7.6, 1.9 Hz, 1H), 7.51 (dddd, *J* = 8.3, 7.1, 5.0, 1.9 Hz, 1H), 7.20 (ddd, *J* = 8.0, 7.3, 1.1 Hz, 1H), 7.13 (ddd, *J* = 11.3, 8.3, 1.1 Hz, 1H), 6.81 (d, *J* = 1.5 Hz, 1H), 6.74 – 6.65 (m, 2H), 5.91 – 5.89 (m, 2H), 4.52 (dd, *J* = 6.2, 3.2 Hz, 1H), 4.15 (qq, *J* = 7.1, 3.6 Hz, 2H), 3.85 (dddd, *J* = 7.5, 6.2, 3.3, 1.0 Hz, 1H), 3.67 (ddd, *J* = 18.5, 7.9, 2.9 Hz, 1H), 3.43 (ddd, *J* = 18.5, 6.2, 2.9 Hz, 1H), 2.84 (d, *J* = 6.3 Hz, 1H), 1.27 (t, *J* = 7.2 Hz, 3H); <sup>13</sup>C NMR (150 MHz, CDCl<sub>3</sub>):  $\delta$  196.5 (d, *J* = 4.3 Hz), 173.7, 161.9 (d, *J* = 255.2 Hz), 147.4, 146.6, 134.6 (d, *J* = 9.0 Hz), 132.4, 130.5 (d, *J* = 2.6 Hz), 125.6 (d, *J* = 12.9 Hz), 124.4 (d, *J* = 3.4 Hz), 121.9, 116.7 (d, *J* = 23.7 Hz), 109.0, 108.0, 100.9, 72.6, 61.8, 45.5 (d, *J* = 7.7 Hz), 43.1, 14.2; IR (thin film, cm<sup>-1</sup>): 3502, 2983, 2902, 1733, 1685, 1609, 1488, 1452, 1098, 1038, 766; TLC (20% EtOAc/hexanes) R<sub>f</sub>: 0.21; HRMS (ESI): Calculated for [M+H]<sup>+</sup> C<sub>20</sub>H<sub>19</sub>FN<sub>2</sub>O<sub>6</sub>: 397.1063, Found: 397.1060; SFC Analysis: AD column, 20% MeOH, 1.5 mL/min, 150 bar, 210 nm; t<sub>minor</sub> = 6.8 min, t<sub>major</sub> = 8.5 min, 98:2 er; [ $\alpha$ ]<sub>D</sub><sup>25</sup> -17.0 (*c* = 0.22, MeOH).

**General Procedure D for Preparation of  $\delta$ -Keto- $\alpha$ -Carboxy Imidazoles 15a-d**

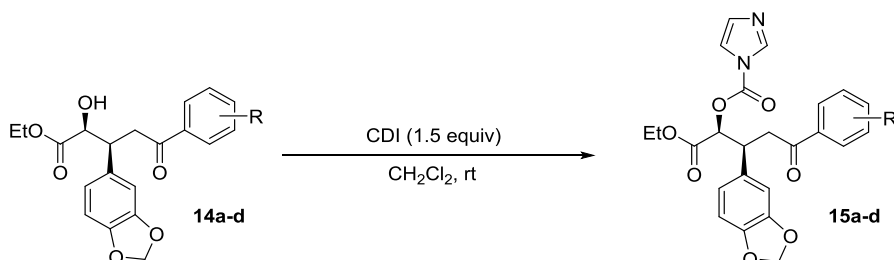

To a flame-dried round-bottomed flask equipped with magnetic stir bar under nitrogen was added 1,1'-carbonyldiimidazole (1.5 equiv) and dichloromethane. To the resulting suspension was added a solution of  $\delta$ -keto- $\alpha$ -hydroxy ester **14a-d** (1.0 equiv) in dichloromethane. The reaction was stirred for the indicated time period then diluted with dichloromethane and water. The aqueous layer was extracted with dichloromethane. The combined organic extracts were dried (Na<sub>2</sub>SO<sub>4</sub>) and concentrated *in vacuo*. The crude product was purified by flash chromatography using the indicated solvent systems.

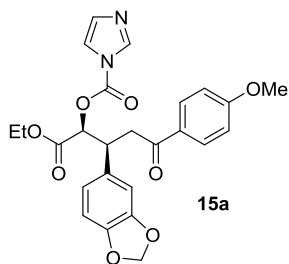

**(2S,3S)-3-(Benzo[d][1,3]dioxol-5-yl)-1-ethoxy-5-(4-methoxyphenyl)-1,5-dioxopentan-2-yl 1H-imidazole-1-carboxylate (15a):** The title compound was prepared according to General Procedure D: 1,1'-carbonyldiimidazole (3.90 g, 24.1 mmol), dichloromethane (32 mL),  $\delta$ -keto- $\alpha$ -hydroxy ester **14a** (6.20 g, 16.1 mmol); 19 h. Flash chromatography provided **15a** (7.25 g, 15.1 mmol, 94% yield) as a white foam. Analytical data for **15a**:  $^1\text{H NMR}$  (600 MHz,  $\text{CDCl}_3$ ):  $\delta$  8.11-8.10

(m, Hz, 1H), 7.93 – 7.88 (m, 2H), 7.39-7.38 (m, 1H), 7.09 – 7.04 (m, 1H), 6.93 – 6.87 (m, 2H), 6.81 (d,  $J = 1.7$  Hz, 1H), 6.80 – 6.70 (m, 2H), 5.92 (s, 2H), 5.55 (d,  $J = 4.9$  Hz, 1H), 4.23 – 4.02 (m, 3H), 3.84 (s, 3H), 3.50 (dd,  $J = 17.6, 8.0$  Hz, 1H), 3.39 (dd,  $J = 17.5, 6.0$  Hz, 1H), 1.17 (t,  $J = 7.2$  Hz, 3H);  $^{13}\text{C NMR}$  (150 MHz,  $\text{CDCl}_3$ ):  $\delta$  195.1, 167.3, 163.8, 147.9, 147.8, 147.0, 137.0, 131.8, 130.8, 130.2, 129.3, 121.6, 117.1, 113.8, 108.4, 108.3, 101.1, 77.9, 62.0, 55.4, 41.2, 39.8, 13.9; **IR** (thin film,  $\text{cm}^{-1}$ ): 2981, 1752, 1674, 1601, 1397, 1172, 1038, 733; **TLC** (50% EtOAc/hexanes)  $R_f$  : 0.11; **HRMS** (ESI): Calculated for  $[\text{M}-\text{C}_3\text{H}_3\text{N}_2+\text{MeOH}]^+$   $\text{C}_{23}\text{H}_{25}\text{O}_9$ : 445.1499, Found: 445.1495;  $[\alpha]_D^{25}$  -6.3 ( $c = 0.26$ , MeOH).

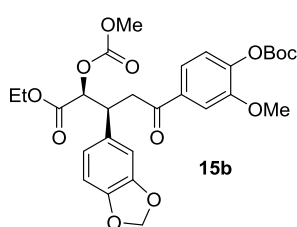

**(2S,3S)-3-(Benzo[d][1,3]dioxol-5-yl)-5-(4-((tert-butoxycarbonyl)oxy)-3-methoxyphenyl)-1-ethoxy-1,5-dioxopentan-2-yl 1H-imidazole-1-carboxylate (15b):** The title compound was prepared according to General Procedure D: 1,1'-carbonyldiimidazole (248 mg, 1.53 mmol), dichloromethane (2.0 mL),  $\delta$ -keto- $\alpha$ -hydroxy ester **14b** (512 mg, 1.02 mmol); 2 h. Flash chromatography provided **15b** (550 mg, 0.93 mmol, 91% yield) as a white foam. Analytical data

for **15b**:  $^1\text{H NMR}$  (600 MHz,  $\text{CDCl}_3$ ):  $\delta$  8.12 (t,  $J = 1.0$  Hz, 1H), 7.55 (d,  $J = 1.9$  Hz, 1H), 7.53 (d,  $J = 8.2$  Hz, 1H), 7.39 (t,  $J = 1.5$  Hz, 1H), 7.19 (d,  $J = 8.2$  Hz, 1H), 7.08 (dd,  $J = 1.7, 0.8$  Hz, 1H), 6.82 – 6.79 (m, 1H), 6.79 – 6.72 (m, 2H), 5.94 (s, 2H), 5.55 (d,  $J = 5.0$  Hz, 1H), 4.25 – 4.09 (m, 3H), 3.88 (s, 3H), 3.51 (dd,  $J = 17.8, 7.6$  Hz, 1H), 3.45 (dd,  $J = 17.7, 6.4$  Hz, 1H), 1.54 (s, 9H), 1.20 (t,  $J = 7.1$  Hz, 3H);  $^{13}\text{C NMR}$  (150 MHz,  $\text{CDCl}_3$ ):  $\delta$  195.5, 167.2, 151.6, 150.6, 148.0, 147.9, 147.2, 144.5, 137.1, 134.9, 131.6, 131.0, 122.5, 121.7, 121.3, 117.1, 111.5, 108.4, 108.4, 101.2, 84.1, 77.8, 62.1, 56.1, 41.2, 40.2, 27.5, 14.0; **IR** (thin film,  $\text{cm}^{-1}$ ): 2981, 1760, 164, 1506, 1396, 1145, 737; **TLC** (50% EtOAc/hexanes)  $R_f$  : 0.19; **HRMS** (ESI): Calculated for  $[\text{M}-\text{C}_3\text{H}_3\text{N}_2+\text{MeOH}]^+$   $\text{C}_{28}\text{H}_{30}\text{O}_{12}$ : 561.1972, Found: 561.1970;  $[\alpha]_D^{25}$  +10.8 ( $c = 0.32$ , MeOH).

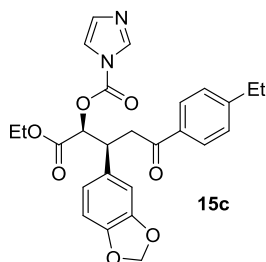

**(2S,3S)-3-(Benzo[d][1,3]dioxol-5-yl)-1-ethoxy-5-(4-ethylphenyl)-1,5-dioxopentan-2-yl 1H-imidazole-1-carboxylate (15c):** The title compound was prepared according to General Procedure D: 1,1'-carbonyldiimidazole (1.12 g, 6.91 mmol), dichloromethane (9.2 mL),  $\delta$ -keto- $\alpha$ -hydroxy ester **14c** (1.77 g, 4.60 mmol); 3 h. Flash chromatography provided **15c** (2.16 g, 4.51 mmol, 98% yield) as a white foam. Analytical data for **15c**:  $^1\text{H NMR}$  (600 MHz,  $\text{CDCl}_3$ ):  $\delta$  8.11 (t,  $J = 1.0$  Hz, 1H), 7.89 –

7.83 (m, 2H), 7.39 (t,  $J = 1.5$  Hz, 1H), 7.30 – 7.23 (m, 2H), 7.08 (dd,  $J = 1.7, 0.8$  Hz, 1H), 6.81 (d,  $J = 1.7$  Hz, 1H), 6.80 – 6.73 (m, 2H), 5.94 (s, 2H), 5.56 (d,  $J = 4.9$  Hz, 1H), 4.27 – 4.05 (m, 3H), 3.54 (dd,  $J = 17.7, 7.9$  Hz, 1H), 3.43 (dd,  $J = 17.7, 6.1$  Hz, 1H), 2.69 (q,  $J = 7.6$  Hz, 2H), 1.24 (t,  $J = 7.6$  Hz, 3H), 1.19 (t,  $J = 7.1$  Hz, 3H);  $^{13}\text{C NMR}$  (150 MHz,  $\text{CDCl}_3$ ):  $\delta$  196.3, 167.3,

150.7, 148.0, 147.9, 147.1, 137.1, 134.1, 131.8, 130.9, 128.2, 121.7, 117.1, 108.5, 108.4, 101.2, 77.9, 62.1, 41.2, 40.1, 28.9, 15.1, 14.0; **IR** (thin film,  $\text{cm}^{-1}$ ): 2969, 2935, 1735, 1682, 1606, 1490, 1396, 1239, 1039, 735; **TLC** (30% EtOAc/hexanes)  $R_f$ : 0.08; **HRMS** (ESI): Calculated for  $[\text{M-C}_3\text{H}_3\text{N}_2+\text{MeOH}]^+$   $\text{C}_{24}\text{H}_{27}\text{O}_8$ : 443.1706, Found: 443.1702;  $[\alpha]_{\text{D}}^{25} +1.8$  ( $c = 0.29$ , MeOH).

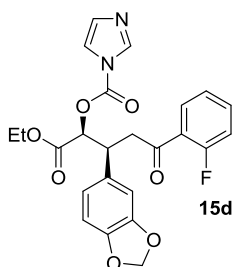

**(2S,3S)-3-(Benzo[d][1,3]dioxol-5-yl)-1-ethoxy-5-(2-fluorophenyl)-1,5-dioxopentan-2-yl 1H-imidazole-1-carboxylate (15d)**: The title compound was prepared according to General Procedure D: 1,1'-carbonyldiimidazole (1.73 g, 10.7 mmol), dichloromethane (14.2 mL),  $\delta$ -keto- $\alpha$ -hydroxy ester **14d** (2.66 g, 7.11 mmol); 24 h. Flash chromatography provided **15d** (3.19 g, 6.81 mmol, 96% yield) as a viscous pale yellow oil. Analytical data for **15d**:  **$^1\text{H}$  NMR** (600 MHz,  $\text{CDCl}_3$ ):  $\delta$  8.10 (t,  $J = 1.1$  Hz, 1H), 7.79 (td,  $J = 7.6$ , 1.9 Hz, 1H), 7.54 – 7.46 (m, 1H), 7.38 (t,  $J = 1.5$  Hz, 1H), 7.22 – 7.17 (m, 1H), 7.10 (ddd,  $J = 11.4$ , 8.3, 1.1 Hz, 1H), 7.06 (dd,  $J = 1.7$ , 0.9 Hz, 1H), 6.79 (d,  $J = 1.7$  Hz, 1H), 6.77 – 6.71 (m, 2H), 5.92 (s, 2H), 5.53 (d,  $J = 5.0$  Hz, 1H), 4.24 – 4.05 (m, 3H), 3.57 (ddd,  $J = 18.4$ , 7.7, 2.8 Hz, 1H), 3.46 (ddd,  $J = 18.4$ , 6.4, 2.7 Hz, 1H), 1.19 (t,  $J = 7.2$  Hz, 3H);  **$^{13}\text{C}$  NMR** (150 MHz,  $\text{CDCl}_3$ ):  $\delta$  195.0 (d,  $J = 3.9$  Hz), 167.2, 161.8 (d,  $J = 254.2$  Hz), 148.0, 147.8, 147.0, 137.0, 135.0 (d,  $J = 9.1$  Hz), 131.5, 130.8, 130.6 (d,  $J = 2.5$  Hz), 124.9 (d,  $J = 12.6$  Hz), 124.6 (d,  $J = 3.3$  Hz), 121.7, 117.0, 116.7 (d,  $J = 24.0$  Hz), 108.4, 108.2, 101.1, 77.8, 62.0, 45.2 (d,  $J = 8.2$  Hz), 41.0 (d,  $J = 2.0$  Hz), 13.9; **IR** (thin film,  $\text{cm}^{-1}$ ): 2905, 1749, 1685, 1609, 1489, 1452, 1039, 765; **TLC** (30% EtOAc/hexanes)  $R_f$ : 0.08; **HRMS** (ESI): Calculated for  $[\text{M-C}_3\text{H}_3\text{N}_2+\text{MeOH}]^+$   $\text{C}_{22}\text{H}_{22}\text{FO}_8$ : 433.1299, Found: 433.1295;  $[\alpha]_{\text{D}}^{25} -10.0$  ( $c = 0.21$ , MeOH).

### General Procedure E for Preparation of $\beta$ -Keto- $\gamma$ -Butyrolactones 9a-d

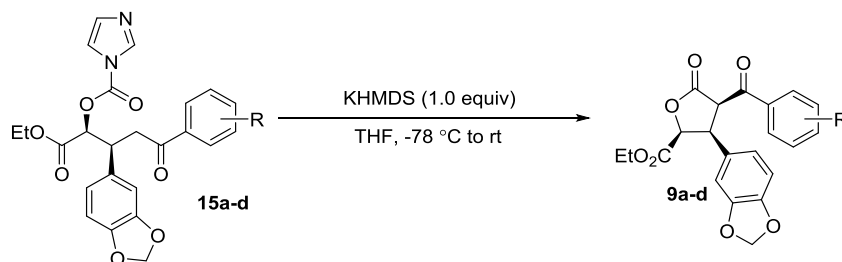

To a flame-dried, oversized round-bottomed flask (500 mL-1000 mL) equipped with magnetic stir bar under nitrogen was added a solution of  $\delta$ -keto- $\beta$ -carboxy imidazole **15a-d** (1 equiv) in anhydrous tetrahydrofuran (0.1 M). The flask was cooled to  $-78$   $^{\circ}\text{C}$  and a solution of potassium bis(trimethylsilyl)amide (0.5 M in toluene) was added slowly as a steady stream. After 15 min, the reaction was warmed to  $0$   $^{\circ}\text{C}$  in an ice bath. After 1 h, the reaction was warmed to room temperature. After an additional 30 min, the reaction was quenched with aqueous saturated ammonium chloride, diluted with water, and extracted with diethyl ether (2x). The combined organic extracts were washed with brine, dried ( $\text{MgSO}_4$ ), and concentrated *in vacuo*. The crude product was purified by flash chromatography using the indicated solvent systems.

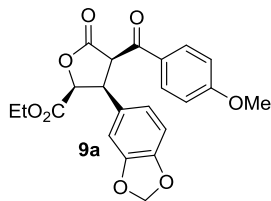

**Ethyl (2S,3S,4R)-3-(benzo[d][1,3]dioxol-5-yl)-4-(4-methoxybenzoyl)-5-oxotetrahydrofuran-2-carboxylate (9a):** The title compound was prepared according to General Procedure E:  $\delta$ -keto- $\beta$ -carboxy imidazole **15a** (3.17 g, 6.60 mmol), tetrahydrofuran (72 mL), potassium bis(trimethylsilyl)amide (13.2 mL, 6.60 mmol). The diastereomer ratio (>20:1 dr) was determined by  $^1\text{H}$  NMR spectroscopic analysis of the crude reaction mixture in which no diastereomer was observed. Flash chromatography provided **9a** (2.02 g, 4.90 mmol, 74% yield, >20:1 dr) as colorless viscous oil. Analytical data for **9a**:  $^1\text{H}$  NMR (600 MHz,  $\text{CDCl}_3$ ):  $\delta$  8.09 – 8.01 (m, 2H), 7.01 – 6.96 (m, 2H), 6.77 – 6.64 (m, 3H), 5.26 (d,  $J$  = 8.2 Hz, 1H), 4.94 (d,  $J$  = 8.7 Hz, 1H), 4.66 (t,  $J$  = 8.4 Hz, 1H), 3.97 (ddq,  $J$  = 42.5, 10.8, 7.1 Hz, 2H), 3.88 (s, 3H), 1.00 (t,  $J$  = 7.2 Hz, 3H);  $^{13}\text{C}$  NMR (150 MHz,  $\text{CDCl}_3$ ):  $\delta$  189.5, 171.1, 168.0, 164.5, 148.0, 147.6, 132.1, 128.3, 128.1, 121.1, 114.1, 108.5, 108.0, 101.3, 79.3, 61.6, 55.6, 52.3, 46.8, 13.7; IR (thin film,  $\text{cm}^{-1}$ ): 2982, 1785, 1742, 1671, 1601, 1507, 1037; TLC (30% EtOAc/hexanes)  $R_f$ : 0.24; HRMS (ESI): Calculated for  $[\text{M}+\text{H}]^+$   $\text{C}_{22}\text{H}_{21}\text{O}_8$ : 413.1236, Found: 413.1237;  $[\alpha]_D^{25}$  +97.8 ( $c$  = 0.26, MeOH).

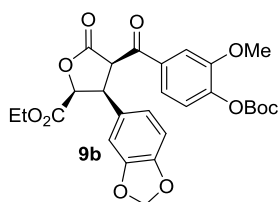

**Ethyl (2S,3S,4R)-3-(benzo[d][1,3]dioxol-5-yl)-4-(4-((tert-butoxycarbonyl)oxy)-3-methoxybenzoyl)-5-oxotetrahydrofuran-2-carboxylate (9b):** The title compound was prepared according to General Procedure E:  $\delta$ -keto- $\beta$ -carboxy imidazole **15b** (2.28 g, 3.83 mmol), tetrahydrofuran (38 mL), potassium bis(trimethylsilyl)amide (7.67 mL, 3.83 mmol); The diastereomer ratio (>20:1 dr) was determined by  $^1\text{H}$

NMR spectroscopic analysis of the crude reaction mixture in which no diastereomer was observed. Flash chromatography provided **9b** (2.02 g, 4.90 mmol, 74% yield, >20:1 dr) as a colorless solid. Analytical data for **9b**:  $^1\text{H}$  NMR (600 MHz,  $\text{CDCl}_3$ ):  $\delta$  7.71 (dd,  $J$  = 8.3, 2.0 Hz, 1H), 7.65 (d,  $J$  = 2.0 Hz, 1H), 7.30 – 7.24 (m, 1H), 6.72 (d,  $J$  = 8.0 Hz, 1H), 6.69 (d,  $J$  = 1.8 Hz, 1H), 6.65 (dd,  $J$  = 8.1, 1.9 Hz, 1H), 5.93 (q,  $J$  = 1.4 Hz, 2H), 5.24 (d,  $J$  = 8.3 Hz, 1H), 4.97 (d,  $J$  = 9.2 Hz, 1H), 4.65 (t,  $J$  = 8.7 Hz, 1H), 4.03 – 3.91 (m, 2H), 3.90 (s, 3H), 1.54 (s, 9H), 0.99 (t,  $J$  = 7.1 Hz, 3H);  $^{13}\text{C}$  NMR (150 MHz,  $\text{CDCl}_3$ ):  $\delta$  190.4, 170.7, 168.0, 151.6, 150.5, 148.1, 147.7, 145.1, 133.9, 127.5, 123.4, 122.7, 121.0, 112.6, 108.5, 107.9, 101.3, 84.1, 79.2, 61.7, 56.1, 52.4, 47.0, 27.5, 13.7; IR (thin film,  $\text{cm}^{-1}$ ): 2982, 1762, 1684, 1507, 889; m.p. 68-70  $^\circ\text{C}$ ; TLC (30% EtOAc/hexanes)  $R_f$ : 0.27; HRMS (ESI): Calculated for  $[\text{M}+\text{Na}]^+$   $\text{C}_{27}\text{H}_{28}\text{NaO}_{11}$ : 551.1529, Found: 551.1530;  $[\alpha]_D^{25}$  +156.0 ( $c$  = 0.14, MeOH).

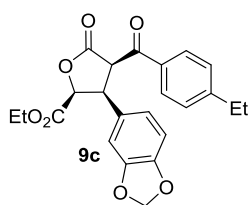

**Ethyl (2S,3S,4R)-3-(benzo[d][1,3]dioxol-5-yl)-4-(4-ethylbenzoyl)-5-oxotetrahydrofuran-2-carboxylate (9c):** The title compound was prepared according to General Procedure E:  $\delta$ -keto- $\beta$ -carboxy imidazole **15c** (2.08 g, 4.34 mmol), tetrahydrofuran (47 mL), potassium bis(trimethylsilyl)amide (8.70 mL, 4.34 mmol). The diastereomer ratio (>20:1 dr) was determined by  $^1\text{H}$  NMR spectroscopic analysis of the crude

reaction mixture by comparison of the integration of resonances at  $\delta$  5.26 (major diastereomer) and  $\delta$  5.10 (minor diastereomer). Flash chromatography provided **9c** (1.23 g, 3.00 mmol, 69%

yield, >20:1 dr) as a colorless, viscous oil. Analytical data for **9c**:  $^1\text{H NMR}$  (600 MHz,  $\text{CDCl}_3$ ):  $\delta$  8.00 (d,  $J = 8.4$  Hz, 1H), 7.36 – 7.30 (m, 2H), 6.74 – 6.65 (m, 3H), 5.92 (t,  $J = 1.1$  Hz, 2H), 5.25 (d,  $J = 8.3$  Hz, 1H), 5.00 (d,  $J = 8.9$  Hz, 1H), 4.66 (t,  $J = 8.5$  Hz, 1H), 3.97 (ddq,  $J = 41.5$ , 10.7, 7.1 Hz, 2H), 2.72 (q,  $J = 7.6$  Hz, 2H), 1.25 (t,  $J = 7.6$  Hz, 3H), 0.99 (t,  $J = 7.2$  Hz, 3H);  $^{13}\text{C NMR}$  (150 MHz,  $\text{CDCl}_3$ ):  $\delta$  190.9, 170.9, 168.0, 151.6, 148.0, 147.6, 133.0, 129.8, 128.4, 127.9, 121.0, 108.5, 108.0, 101.3, 79.2, 61.6, 52.3, 46.8, 29.0, 15.0, 13.7; **IR** (thin film,  $\text{cm}^{-1}$ ): 2969, 1787, 1741, 1680, 1606, 1505, 1038, 737; **TLC** (30% EtOAc/hexanes)  $R_f$ : 0.35; **HRMS** (ESI): Calculated for  $[\text{M}+\text{H}]^+$   $\text{C}_{23}\text{H}_{23}\text{O}_7$ : 411.1444, Found: 411.1441;  $[\alpha]_D^{25}$  +131.1 ( $c = 0.58$ , MeOH).

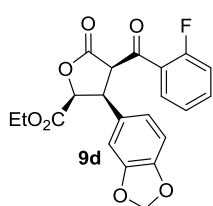

**Ethyl (2S,3S,4R)-3-(benzo[d][1,3]dioxol-5-yl)-4-(2-fluorobenzoyl)-5-oxotetrahydrofuran-2-carboxylate (9d)**: The title compound was prepared according to General Procedure E:  $\delta$ -keto- $\beta$ -carboxy imidazole **15d** (3.09 g, 6.60 mmol), tetrahydrofuran (66 mL), potassium bis(trimethylsilyl)amide (13.2 mL, 6.60 mmol); The keto/enol ratio (7:1) was determined by  $^1\text{H NMR}$  spectroscopic analysis by comparison of the integration of resonances at  $\delta$

5.94 (keto) and  $\delta$  5.79 (enol). The diastereomer ratio (>20:1 dr) was determined by  $^1\text{H NMR}$  spectroscopic analysis of the crude reaction mixture in which no diastereomer was observed. Flash chromatography provided **9d** (1.62 g, 4.05 mmol, 61% yield, 4:1 mixture of keto (>20:1 dr) to enol tautomers) as a colorless, viscous oil. Analytical data for **9d**:  $^1\text{H NMR}$  (Keto tautomer, 600 MHz,  $\text{CDCl}_3$ ):  $\delta$  7.89 (td,  $J = 7.6$ , 1.8 Hz, 1H), 7.63 – 7.57 (m, 1H), 7.30 – 7.25 (m, 1H), 7.19 (ddd,  $J = 11.6$ , 8.3, 1.1 Hz, 1H), 6.77 – 6.68 (m, 3H), 5.94 (s, 2H), 5.17 (d,  $J = 8.4$  Hz, 1H), 5.14 (dd,  $J = 10.1$ , 2.2 Hz, 1H), 4.64 (ddd,  $J = 10.4$ , 8.4, 2.3 Hz, 1H), 3.98 (ddq,  $J = 47.0$ , 10.8, 7.2 Hz, 2H), 1.02 (t,  $J = 7.2$  Hz, 3H);  $^1\text{H NMR}$  (Enol tautomer, 600 MHz,  $\text{CDCl}_3$ ):  $\delta$  11.66 (s, 1H), 7.02 (td,  $J = 7.6$ , 1.1 Hz, 1H), 6.86 (ddd,  $J = 10.6$ , 8.3, 1.1 Hz, 1H), 6.82 – 6.78 (m, 1H), 6.45 (d,  $J = 7.9$  Hz, 1H), 6.42 – 6.36 (m, 2H), 5.79 (d,  $J = 10.7$  Hz, 1H), 5.25 (d,  $J = 9.5$  Hz, 1H), 4.72 (d,  $J = 9.5$  Hz, 1H), 3.78 (ddq,  $J = 69.5$ , 10.9, 7.2 Hz, 2H), 0.91 (t,  $J = 7.1$  Hz, 3H);  $^{13}\text{C NMR}$  (Keto tautomer, 150 MHz,  $\text{CDCl}_3$ ):  $\delta$  190.1 (d,  $J = 3.5$  Hz), 170.5, 167.9, 162.2 (d,  $J = 256.1$  Hz), 148.1, 147.7, 136.0 (d,  $J = 9.5$  Hz), 131.4 (d,  $J = 1.7$  Hz), 127.3, 124.8 (d,  $J = 3.3$  Hz), 121.1, 117.1, 116.9, 108.5, 108.0, 101.3, 78.9, 61.7, 55.4 (d,  $J = 8.3$  Hz), 46.5, 13.7;  $^{13}\text{C NMR}$  (Enol tautomer, 150 MHz,  $\text{CDCl}_3$ ):  $\delta$  175.5, 167.2, 164.4, 158.8 (d,  $J = 251.8$  Hz), 147.7, 132.5 (d,  $J = 8.7$  Hz), 129.7, 129.3 (d,  $J = 2.6$  Hz), 124.2 (d,  $J = 10.7$  Hz), 124.0 (d,  $J = 3.4$  Hz), 122.2, 115.7, 115.6, 108.7, 107.6, 101.4, 100.9, 79.9, 61.4, 46.0 (d,  $J = 7.8$  Hz), 13.6; **IR** (thin film,  $\text{cm}^{-1}$ ): 1791, 1747, 1685, 1609, 1506, 1490, 1454, 1038, 766; **TLC** (30% EtOAc/hexanes)  $R_f$ : 0.27; **HRMS** (ESI): Calculated for  $[\text{M}+\text{H}]^+$   $\text{C}_{21}\text{H}_{18}\text{FO}_7$ : 401.1037, Found: 401.1033;  $[\alpha]_D^{25}$  +66.4 ( $c = 0.14$ , MeOH).

## General Procedure F for Reduction of $\beta$ -Keto- $\gamma$ -Butyrolactones **8a-d**

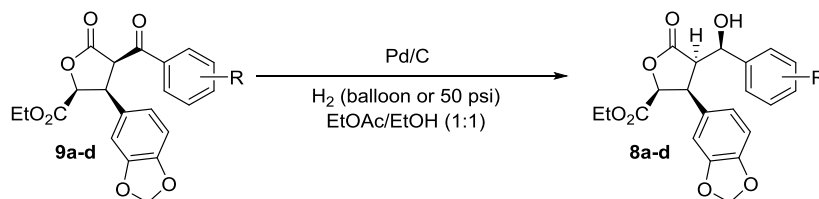

To a round-bottomed flask equipped with magnetic stir bar containing a suspension of 10% palladium on carbon (100 mg/mmol) in absolute ethanol under nitrogen was added a solution of  $\beta$ -keto- $\gamma$ -butyrolactones **9a-9d** in ethyl acetate. The flask was either purged with hydrogen (balloon) and vigorously stirred at room temperature under a hydrogen atmosphere for 1 h or placed in Parr bomb, cycled with nitrogen (3 x 25 psi), hydrogen (3 x 50 psi), then held at 50 psi hydrogen and stirred vigorously for 1h. The crude reaction mixture was filtered over a plug of silica gel eluting with ethyl acetate and concentrated *in vacuo*. The alcohol was used without further purification unless otherwise noted.

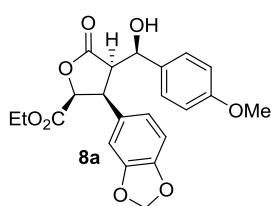

### Ethyl (2S,3S,4R)-3-(benzo[d][1,3]dioxol-5-yl)-4-((R)-hydroxy(4-methoxyphenyl)methyl)-5-oxotetrahydrofuran-2-carboxylate (**8a**):

The title compound was prepared according to General Procedure F: Pd/C (153 mg), ethanol (6.0 mL),  $\beta$ -keto- $\gamma$ -butyrolactone **9a** (629 mg, 1.53 mmol), ethyl acetate (6.0 mL), hydrogen (balloon). Filtration and concentration provided **8a** (620 mg, 1.50 mmol, 98%, 8:1 dr). The diastereomer ratio was determined by  $^1\text{H}$  NMR spectroscopic analysis of the crude reaction mixture by comparison of the integration of resonances at  $\delta$  4.95 (major diastereomer) and  $\delta$  4.97 (minor diastereomer). Analytical data for **8a**:  $^1\text{H}$  NMR (600 MHz,  $\text{CDCl}_3$ ):  $\delta$  7.15 (d,  $J$  = 8.7 Hz, 2H), 6.72 – 6.68 (m, 2H), 6.60 (d,  $J$  = 8.0 Hz, 1H), 6.44 (dd,  $J$  = 8.0, 1.9 Hz, 1H), 6.39 (d,  $J$  = 1.8 Hz, 1H), 5.88 (d,  $J$  = 0.9 Hz, 2H), 4.94 (d,  $J$  = 6.4 Hz, 1H), 4.83 (d,  $J$  = 8.8 Hz, 1H), 3.97 – 3.78 (m, 2H), 3.73 (s, 3H), 3.69 (dd,  $J$  = 11.1, 8.8 Hz, 1H), 3.44 (dd,  $J$  = 11.1, 6.5 Hz, 1H), 0.94 (t,  $J$  = 7.1 Hz, 3H);  $^{13}\text{C}$  NMR (150 MHz,  $\text{CDCl}_3$ ):  $\delta$  176.7, 168.1, 159.5, 147.5, 147.0, 131.4, 127.8, 127.6, 121.4, 113.7, 113.6, 108.1, 108.0, 101.1, 78.9, 73.8, 61.6, 55.2, 49.6, 47.0, 13.7; IR (thin film,  $\text{cm}^{-1}$ ): 3503, 2903, 1781, 1613, 1513, 1446, 1038, 736; TLC (30% EtOAc/hexanes)  $R_f$ : 0.16; HRMS (ESI): Calculated for  $[\text{M}+\text{Na}]^+$   $\text{C}_{22}\text{H}_{22}\text{NaO}_8$ : 437.1212, Found: 437.1211;  $[\alpha]_D^{25}$  +158.2 ( $c$  = 0.18, MeOH).

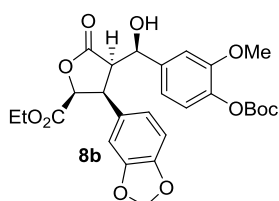

### Ethyl (2S,3S,4R)-3-(benzo[d][1,3]dioxol-5-yl)-4-((R)-4-((tert-butoxycarbonyl)oxy)-3-methoxyphenyl)(hydroxy)methyl)-5-oxotetrahydrofuran-2-carboxylate (**8b**):

The title compound was prepared according to General Procedure F: Pd/C (9.5 mg), ethanol (0.5 mL),  $\beta$ -keto- $\gamma$ -butyrolactone **9b** (50 mg, 0.095 mmol), ethyl acetate (0.5 mL), hydrogen (50 psi). Filtration and concentration provided **8b** (50 mg, 0.094 mmol, 99%, >20:1 dr). The diastereomer ratio was determined by  $^1\text{H}$  NMR spectroscopic analysis of the crude reaction mixture. Analytical data for **8b**:  $^1\text{H}$  NMR (600 MHz,  $\text{CDCl}_3$ ):  $\delta$  6.91 (d,  $J$  = 8.1 Hz, 1H), 6.88 (d,  $J$  = 2.0 Hz, 1H), 6.76 (dd,  $J$  = 8.2, 1.9 Hz, 1H), 6.60 (d,  $J$  = 7.9 Hz,

1H), 6.46 – 6.41 (m, 2H), 5.89 (s, 2H), 4.94 (d,  $J = 6.3$  Hz, 1H), 4.83 (d,  $J = 8.9$  Hz, 1H), 3.95 – 3.77 (m, 2H), 3.74 (s, 3H), 3.72 (d,  $J = 2.6$  Hz, 1H), 3.71 – 3.65 (m, 1H), 3.46 (dd,  $J = 11.5, 6.2$  Hz, 1H), 1.51 (s, 9H), 0.92 (t,  $J = 7.2$  Hz, 3H);  $^{13}\text{C NMR}$  (150 MHz,  $\text{CDCl}_3$ ):  $\delta$  176.5, 168.1, 151.14, 151.06, 147.7, 147.2, 139.9, 138.2, 127.1, 122.0, 121.2, 118.8, 110.8, 108.1, 107.7, 101.2, 83.3, 78.8, 73.7, 61.6, 55.8, 49.0, 46.9, 27.5, 13.6; **IR** (thin film,  $\text{cm}^{-1}$ ): 3503, 2982, 1761, 1507, 1146, 1037, 738; **TLC** (30% EtOAc/hexanes)  $R_f$ : 0.14; **HRMS** (ESI): Calculated for  $[\text{M}+\text{Na}]^+$   $\text{C}_{27}\text{H}_{30}\text{NaO}_{11}$ : 553.1686, Found: 553.1685;  $[\alpha]_{\text{D}}^{25} +110.7$  ( $c = 0.18$ , MeOH).

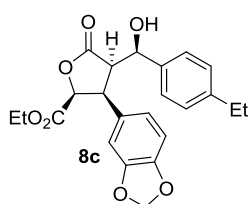

**Ethyl (2S,3S,4R)-3-(benzo[d][1,3]dioxol-5-yl)-4-((R)-(4-ethylphenyl)(hydroxy)methyl)-5-oxotetrahydrofuran-2-carboxylate**

**(8c):** The title compound was prepared according to General Procedure F: Pd/C (380 mg), ethanol (15 mL),  $\beta$ -keto- $\gamma$ -butyrolactone **9c** (1.56 g, 3.80 mmol), ethyl acetate (15 mL), hydrogen (50 psi). Flash chromatography provided **8c** (1.15 g, 2.79 mmol, 73%, 3:1 dr). Analytical data for **8c**:

**$^1\text{H NMR}$**  (Major Diastereomer, 600 MHz,  $\text{CDCl}_3$ ):  $\delta$  7.13 (d,  $J = 7.9$  Hz, 2H), 6.99 (d,  $J = 7.9$  Hz, 2H), 6.57 (d,  $J = 8.0$  Hz, 1H), 6.43 – 6.38 (m, 2H), 5.86 (s, 2H), 4.94 (d,  $J = 6.5$  Hz, 1H), 4.82 (d,  $J = 8.9$  Hz, 1H), 3.95 – 3.77 (m, 2H), 3.71 (dd,  $J = 11.1, 8.8$  Hz, 1H), 3.65 – 3.63 (bs, 1H), 3.44 (dd,  $J = 11.1, 6.5$  Hz, 1H), 2.52 (q,  $J = 7.5$  Hz, 3H), 1.12 (t,  $J = 7.6$  Hz, 3H), 0.92 (t,  $J = 7.1$  Hz, 3H);  **$^{13}\text{C NMR}$**  (Major Diastereomer, 150 MHz,  $\text{CDCl}_3$ ):  $\delta$  176.7, 168.1, 147.4, 146.9, 144.3, 136.4, 127.7, 126.5, 125.4, 121.3, 108.02, 107.99, 101.0, 78.8, 73.9, 61.5, 49.4, 46.9, 28.4, 15.6, 13.6; **IR** (thin film,  $\text{cm}^{-1}$ ): 3504, 2965, 1781, 1506, 1491, 1446, 1039, 737; **TLC** (30% EtOAc/hexanes)  $R_f$ : 0.27; **HRMS** (ESI): Calculated for  $[\text{M}+\text{Na}]^+$   $\text{C}_{23}\text{H}_{24}\text{NaO}_7$ : 435.1420, Found: 435.1416;  $[\alpha]_{\text{D}}^{25} +150.9$  ( $c = 0.34$ , MeOH).

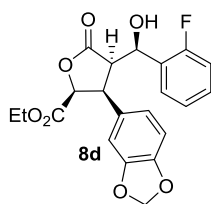

**Ethyl (2S,3S,4R)-3-(benzo[d][1,3]dioxol-5-yl)-4-((R)-(2-fluorophenyl)(hydroxy)methyl)-5-oxotetrahydrofuran-2-carboxylate**

**(8d):** The title compound was prepared according to General Procedure F: Pd/C (138 mg), ethanol (15 mL),  $\beta$ -keto- $\gamma$ -butyrolactone **9d** (1.38 g, 3.45 mmol), ethyl acetate (15 mL), hydrogen (balloon). Filtration and concentration provided **8d** (1.38 g, 3.42 mmol, 99%, 7:1 dr). Analytical data for **8d**:

**$^1\text{H NMR}$**  (600 MHz,  $\text{CDCl}_3$ ):  $\delta$  7.47 (td,  $J = 7.5, 1.9$  Hz, 1H), 7.09 – 7.03 (m, 1H), 7.01 (td,  $J = 7.5, 1.3$  Hz, 1H), 6.70 (ddd,  $J = 10.7, 8.1, 1.3$  Hz, 1H), 6.54 (d,  $J = 7.9$  Hz, 1H), 6.43 – 6.38 (m, 2H), 5.85 (dd,  $J = 8.1, 1.5$  Hz, 2H), 5.21 (dd,  $J = 7.6, 2.5$  Hz, 1H), 4.96 (d,  $J = 8.9$  Hz, 1H), 4.10 (d,  $J = 2.8$  Hz, 1H), 3.97 – 3.77 (m, 3H), 3.42 (dd,  $J = 12.1, 7.6$  Hz, 1H), 0.92 (t,  $J = 7.1$  Hz, 3H);  **$^{13}\text{C NMR}$**  (150 MHz,  $\text{CDCl}_3$ ):  $\delta$  177.0, 168.1, 159.3 (d,  $J = 244.9$  Hz), 147.4, 147.0, 129.5 (d,  $J = 8.6$  Hz), 127.9 (d,  $J = 3.8$  Hz), 126.9 (d,  $J = 12.6$  Hz), 126.3, 124.2 (d,  $J = 3.3$  Hz), 121.2, 114.8 (d,  $J = 21.8$  Hz), 108.0, 107.7, 101.1, 78.9, 67.3 (d,  $J = 2.9$  Hz), 61.6, 48.0, 47.0, 13.6; **IR** (thin film,  $\text{cm}^{-1}$ ): 3503, 2902, 1790, 1743, 1506, 1490, 1454, 1038, 761; **TLC** (30% EtOAc/hexanes)  $R_f$ : 0.19; **HRMS** (ESI): Calculated for  $[\text{M}+\text{Na}]^+$   $\text{C}_{21}\text{H}_{20}\text{FO}_7$ : 403.1193, Found: 403.1193;  $[\alpha]_{\text{D}}^{25} +42.1$  ( $c = 0.15$ , MeOH).



## Preparation of $\alpha$ -Benzylidene- $\gamma$ -Butyrolactone **6a**

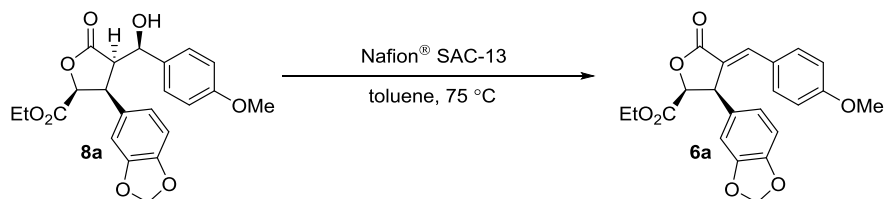

To a flame-dried 100 mL round-bottomed flask equipped with magnetic stir bar were added alcohol **8a** (1.80 g, 4.34 mmol) and dry toluene (43.4 mL). To the resulting solution was added Nafion<sup>®</sup> SAC-13 (434 mg, 100 mg/mmol). The flask was sealed with a rubber septum, purged with nitrogen, stirred, and heated to 75 °C. After 23 h the reaction was filtered (sintered glass funnel, ethyl acetate rinse). Flash chromatography (25-30% ethyl acetate/hexanes) provided **6a** (1.20 g, 3.03 mmol, 70%, >20:1 *E:Z*). Analytical data for **6a**: <sup>1</sup>H NMR (600 MHz, CDCl<sub>3</sub>):  $\delta$  7.73 (d, *J* = 2.1 Hz, 1H), 7.29 (d, *J* = 8.9 Hz, 2H), 6.80 (d, *J* = 8.8 Hz, 2H), 6.70 (d, *J* = 1.2 Hz, 2H), 6.66 (d, *J* = 1.2 Hz, 1H), 5.90 (dd, *J* = 13.9, 1.5 Hz, 2H), 5.16 (d, *J* = 8.1 Hz, 1H), 4.77 (dd, *J* = 8.1, 2.2 Hz, 1H), 3.95 – 3.79 (m, 2H), 3.78 (s, 3H), 1.03 (t, *J* = 7.2 Hz, 3H); <sup>13</sup>C NMR (150 MHz, CDCl<sub>3</sub>):  $\delta$  171.4, 167.1, 161.3, 147.9, 147.4, 139.7, 132.8, 129.5, 125.9, 122.5, 122.3, 114.2, 108.8, 108.3, 101.2, 78.6, 61.4, 55.3, 47.0, 13.8; IR (thin film, cm<sup>-1</sup>): 1757, 1645, 1602, 1558, 1166, 1037; m.p. 109-110 °C; TLC (30% EtOAc/hexanes) R<sub>f</sub>: 0.18; HRMS (ESI): Calculated for [M+H]<sup>+</sup> C<sub>22</sub>H<sub>21</sub>O<sub>7</sub>: 397.1287, Found: 397.1284; [ $\alpha$ ]<sub>D</sub><sup>25</sup> +389.5 (*c* = 0.20, MeOH).

## General Procedure G for Preparation of $\alpha$ -Benzylidene- $\gamma$ -Butyrolactones **6b-6d**

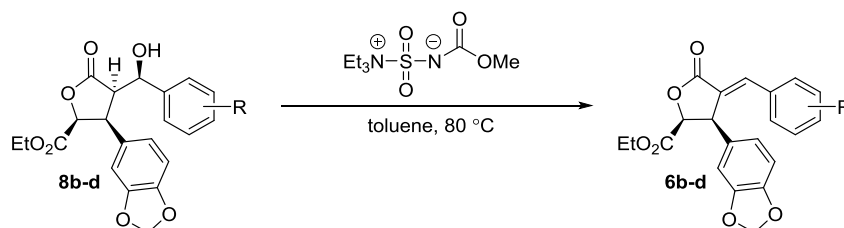

To a flame-dried scintillation vial equipped with magnetic stir bar were added alcohol **8b-d** (275 mg, 1.0 equiv) and toluene. To the resulting solution was added methyl *N*-(triethylammoniumsulfonyl)carbamate (2.0 equiv). The resulting mixture was heated to 80 °C under nitrogen. After 1.5 h the reaction was concentrated and purified by flash chromatography using the indicated solvent systems.

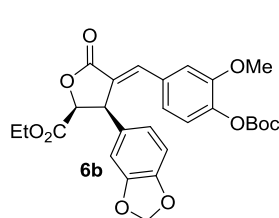

**Ethyl (2*S*,3*R*)-3-(benzo[*d*][1,3]dioxol-5-yl)-4-((*E*)-4-((tert-butoxycarbonyl)oxy)-3-methoxybenzylidene)-5-oxotetrahydrofuran-2-carboxylate (**6b**):** The title compound was prepared according to General Procedure G: alcohol **8b** (275 mg, 0.518 mmol, 1.0 equiv), toluene (5.2 mL), methyl *N*-(triethylammoniumsulfonyl)carbamate (Burgess reagent, 247 mg, 1.04 mmol, 2.0 equiv). Flash chromatography (20% acetone/petroleum ether) provided **6b** (163 mg, 0.318 mmol, 61%, >20:1 *E:Z*) as a white foam. Analytical data for **6b**: <sup>1</sup>H NMR (600 MHz, CDCl<sub>3</sub>):  $\delta$  7.74 (d, *J* = 2.2 Hz, 1H), 7.06 (d, *J* =

8.2 Hz, 1H), 6.97 (dd,  $J = 8.3, 2.0$  Hz, 1H), 6.85 (d,  $J = 2.0$  Hz, 1H), 6.73 – 6.67 (m, 2H), 6.64 (d,  $J = 1.6$  Hz, 1H), 5.91 (dd,  $J = 6.6, 1.4$  Hz, 2H), 5.16 (d,  $J = 8.0$  Hz, 1H), 4.77 (dd,  $J = 8.0, 2.2$  Hz, 1H), 3.87 (ddq,  $J = 59.4, 10.8, 7.1$  Hz, 2H), 3.63 (s, 3H), 1.52 (s, 9H), 1.03 (t,  $J = 7.1$  Hz, 3H);  $^{13}\text{C NMR}$  (150 MHz,  $\text{CDCl}_3$ ):  $\delta$  170.9, 166.9, 151.2, 150.9, 148.1, 147.6, 141.7, 139.4, 131.9, 129.4, 125.4, 124.5, 122.8, 122.2, 113.9, 108.7, 108.3, 101.3, 83.9, 78.7, 61.5, 55.9, 47.0, 27.5, 13.8; **IR** (thin film,  $\text{cm}^{-1}$ ): 1761, 1507, 1256, 1146, 1036, 737; **TLC** (30% EtOAc/hexanes)  $R_f$  : 0.18; **HRMS** (ESI): Calculated for  $[\text{M}+\text{H}]^+$   $\text{C}_{27}\text{H}_{29}\text{O}_{10}$ : 513.1761, Found: 513.1759;  $[\alpha]_D^{25} +133.3$  ( $c = 0.14$ , MeOH).

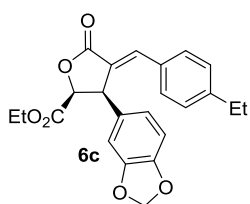

**Ethyl (2S,3R)-3-(benzo[d][1,3]dioxol-5-yl)-4-((E)-4-ethylbenzylidene)-5-oxotetrahydrofuran-2-carboxylate (6c):** The title compound was prepared according to General Procedure G: alcohol **8c** (200 mg, 0.485 mmol, 1.0 equiv), toluene (4.9 mL), methyl *N*-(triethylammoniumsulfonyl)carbamate (Burgess reagent, 231 mg, 0.97 mmol, 2.00 equiv). Flash chromatography (15% acetone/petroleum ether) provided **6c** (80 mg, 0.203 mmol, 42%, >20:1 *E:Z*) as a white foam. Analytical data for **6c**:  $^1\text{H NMR}$  (600 MHz,  $\text{CDCl}_3$ ):  $\delta$  7.76 (d,  $J = 2.1$  Hz, 1H), 7.27 (d,  $J = 8.2$  Hz, 2H), 7.12 (d,  $J = 8.0$  Hz, 2H), 6.71 (d,  $J = 1.3$  Hz, 2H), 6.66 (t,  $J = 1.1$  Hz, 1H), 5.90 (dd,  $J = 16.4, 1.4$  Hz, 2H), 5.16 (d,  $J = 8.0$  Hz, 1H), 4.78 (dd,  $J = 8.0, 2.2$  Hz, 1H), 3.88 (ddq,  $J = 55.3, 10.7, 7.2$  Hz, 2H), 2.61 (q,  $J = 7.6$  Hz, 2H), 1.19 (t,  $J = 7.6$  Hz, 3H), 1.04 (t,  $J = 7.1$  Hz, 3H);  $^{13}\text{C NMR}$  (150 MHz,  $\text{CDCl}_3$ ):  $\delta$  171.2, 167.0, 147.9, 147.3, 147.3, 140.0, 131.0, 130.6, 129.6, 128.3, 124.5, 122.3, 108.8, 108.3, 101.2, 78.7, 61.4, 47.1, 28.7, 15.1, 13.8; **IR** (thin film,  $\text{cm}^{-1}$ ): 2968, 2932, 1760, 1645, 1488, 1171, 1038, 736; **m.p.** 106-107 °C; **TLC** (30% EtOAc/hexanes)  $R_f$  : 0.26; **HRMS** (ESI): Calculated for  $[\text{M}+\text{H}]^+$   $\text{C}_{23}\text{H}_{23}\text{O}_6$ : 395.1495, Found: 395.1492;  $[\alpha]_D^{25} +333.7$  ( $c = 0.17$ , MeOH).

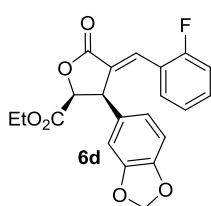

**Ethyl (2S,3R)-3-(benzo[d][1,3]dioxol-5-yl)-4-((E)-2-fluorobenzylidene)-5-oxotetrahydrofuran-2-carboxylate (6d):** The title compound was prepared according to General Procedure G: alcohol **8d** (402 mg, 1.00 mmol, 1.00 equiv), toluene (10 mL), methyl *N*-(triethylammoniumsulfonyl)carbamate (Burgess reagent, 477 mg, 2.00 mmol, 2.00 equiv). Flash chromatography (20% acetone/petroleum ether) provided **6d** (213 mg, 0.554 mmol, 55%, >20:1 *E:Z*) as a white foam. Analytical data for **6d**:  $^1\text{H NMR}$  (600 MHz,  $\text{CDCl}_3$ ):  $\delta$  7.98 (d,  $J = 2.5$  Hz, 1H), 7.29 – 7.24 (m, 1H), 7.16 (td,  $J = 7.6, 1.7$  Hz, 1H), 7.03 – 6.94 (m, 2H), 6.67 – 6.55 (m, 3H), 5.88 (dd,  $J = 17.4, 1.4$  Hz, 2H), 5.18 (d,  $J = 8.4$  Hz, 1H), 4.77 (dd,  $J = 8.4, 2.6$  Hz, 1H), 3.85 (ddq,  $J = 58.5, 10.8, 7.2$  Hz, 2H), 1.00 (t,  $J = 7.2$  Hz, 3H);  $^{13}\text{C NMR}$  (150 MHz,  $\text{CDCl}_3$ ):  $\delta$  170.4, 167.1, 161.0 (d,  $J = 254.1$  Hz), 147.8, 147.3, 132.0 (d,  $J = 8.7$  Hz), 131.9 (d,  $J = 5.1$  Hz), 130.2 (d,  $J = 2.0$  Hz), 128.7, 128.0, 123.9 (d,  $J = 3.7$  Hz), 122.3, 121.5 (d,  $J = 12.1$  Hz), 115.8, 115.7, 108.8, 108.2, 101.2, 78.6, 61.5, 47.3 (d,  $J = 2.5$  Hz), 13.7; **IR** (thin film,  $\text{cm}^{-1}$ ): 2984, 1764, 1653, 1488, 1445, 1238, 1198, 1175, 1038, 760; **m.p.** 113-115 °C; **TLC** (30% EtOAc/hexanes)  $R_f$  : 0.22; **HRMS** (ESI): Calculated for  $[\text{M}+\text{H}]^+$   $\text{C}_{21}\text{H}_{18}\text{FO}_6$ : 385.1087, Found: 385.1083;  $[\alpha]_D^{25} +151.5$  ( $c = 0.20$ , MeOH).

## Epimerization/Hydrolysis of $\alpha$ -Benzylidene- $\gamma$ -Butyrolactone **16a**

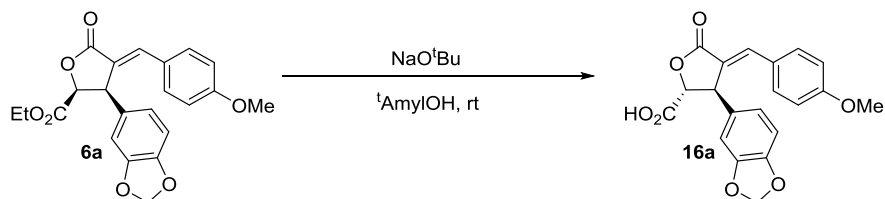

To a flame-dried 25 mL round-bottomed flask were added  $\alpha$ -benzylidene- $\gamma$ -butyrolactone **6a** (250 mg, 0.631 mmol, 1.0 equiv) and *tert*-amyl alcohol (12.5 mL). To the resulting semi-solution under nitrogen was added sodium *tert*-butoxide (121 mg, 1.26 mmol, 2.0 equiv). The cream-colored suspension was stirred vigorously at room temperature. After 6 h, the reaction was cooled to 0 °C and quenched with 1M HCl (10 mL). The reaction was extracted with ethyl acetate (2 x 15 mL). The combined organic extracts were washed with brine, dried ( $\text{Na}_2\text{SO}_4$ ), and concentrated *in vacuo*. The crude product was purified by flash chromatography (96.5:3:0.5 dichloromethane:methanol:acetic acid). The residue obtained was taken up in ethyl acetate (20 mL) and washed with water (3 x 10 mL), brine (10 mL), dried ( $\text{Na}_2\text{SO}_4$ ) and concentrated *in vacuo* to give acid **16a** (172 mg, 0.467 mmol, 74%, 14:1 dr) as a cream colored foam. Analytical data for **16a**:  $^1\text{H NMR}$  (600 MHz, acetone- $d_6$ ):  $\delta$  7.70 (d,  $J = 2.0$  Hz, 1H), 7.50 (d,  $J = 8.9$  Hz, 2H), 6.94 – 6.80 (m, 5H), 6.00 (dd,  $J = 12.5, 1.1$  Hz, 2H), 4.88 (d,  $J = 2.3$  Hz, 1H), 4.81 (t,  $J = 2.3$  Hz, 1H), 3.81 (s, 3H);  $^{13}\text{C NMR}$  (150 MHz, acetone- $d_6$ ):  $\delta$  171.0, 170.3, 161.6, 148.6, 147.3, 139.0, 133.9, 132.9, 126.0, 122.1, 120.3, 114.3, 108.6, 107.3, 101.5, 80.8, 54.9, 47.9; IR (thin film,  $\text{cm}^{-1}$ ): 2905, 1759, 1645, 1601, 1514, 1168, 1038, 736; TLC (94.5:5:0.1  $\text{CH}_2\text{Cl}_2$ :MeOH:AcOH)  $R_f$ : 0.36; HRMS (ESI): Calculated for  $[\text{M}+\text{H}]^+$   $\text{C}_{20}\text{H}_{17}\text{O}_7$ : 369.0974, Found: 369.0970;  $[\alpha]_D^{25} +275.2$  ( $c = 0.10$ , MeOH).  $^1\text{H NMR}$  (600 MHz,  $\text{CDCl}_3$ ):  $\delta$  7.80 (d,  $J = 2.0$  Hz, 1H), 7.30 (d,  $J = 8.6$  Hz, 2H), 6.80 (d,  $J = 8.7$  Hz, 2H), 6.79 – 6.74 (m, 3H), 5.96 (dd,  $J = 12.8, 1.4$  Hz, 2H), 4.85 (d,  $J = 2.3$  Hz, 1H), 4.60 (d,  $J = 2.2$  Hz, 1H), 3.78 (s, 3H).  $^{13}\text{C NMR}$  (150 MHz,  $\text{CDCl}_3$ ):  $\delta$  173.9, 171.6, 161.6, 148.7, 147.5, 141.1, 133.0, 132.8, 125.8, 120.2, 120.0, 114.4, 109.0, 107.2, 101.4, 80.7, 55.4, 48.1. Data reported by Brown, *et al.*<sup>5</sup>  $^1\text{H NMR}$  (400 MHz,  $\text{CDCl}_3$ ):  $\delta$  7.80 (d,  $J = 1.5$  Hz, 1H), 7.30 (d,  $J = 8.8$  Hz, 2H), 6.81 (d,  $J = 8.8$  Hz, 2H), 6.77 (m, 3H), 5.97-5.95 (2d,  $J = 1.2$  Hz, 2H), 4.84 (d,  $J = 2.1$  Hz, 1H), 4.60 (s, 1H), 3.79 (s, 3H).  $^{13}\text{C NMR}$  not reported.

## Preparation of Megacerotonic Acid **1a**

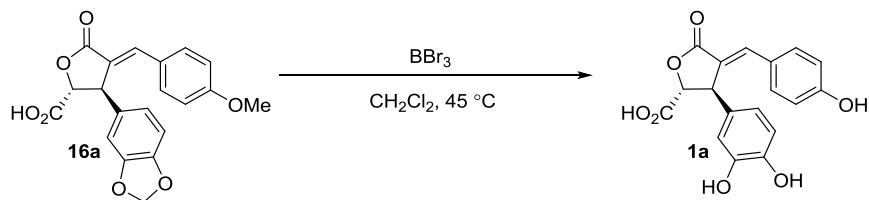

To a flame-dried 10 mL round-bottomed flask equipped with magnetic stir bar were added acid **16a** (25.0 mg, 0.068 mmol, 1.0 equiv) and dichloromethane (2.5 mL). To the resulting solution under nitrogen at 0 °C was added dropwise boron tribromide (105  $\mu\text{L}$ , 272 mg, 1.09 mmol, 16

equiv). After 15 min the reaction was fitted with a reflux condenser and heated to 45 °C under nitrogen. After 6 h the reaction was cooled to room temperature, quenched through the condenser with dropwise addition of 0.1M NaOH (8 mL), and stirred vigorously for 20 min. The resulting mixture was extracted with ethyl acetate (2 x 10 mL). The combined organic extracts were washed with brine, dried (Na<sub>2</sub>SO<sub>4</sub>) and concentrated *in vacuo*. A portion of the crude product (5/6) was purified by semi-preparative HPLC (A: 10 mM NH<sub>4</sub>OAc in water, B: 90:10 acetonitrile:10 mM NH<sub>4</sub>OAc in water; A:B 90:10 to 50:50 over 41 min). The fractions collected were concentrated on rotatory evaporator to remove acetonitrile and extracted with ethyl acetate (10 mL). The aqueous layer was brought to pH = 0 with concentrated sulfuric acid and extracted with ethyl acetate (2 x 10 mL). The combined organic extracts (excluding the first) were washed with brine, dried (Na<sub>2</sub>SO<sub>4</sub>) and concentrated to yield megacerotonic acid **1a** (6.6 mg, 0.019 mmol, 34%) as colorless, amorphous solid. Analytical data for **1a**: <sup>1</sup>H NMR (600 MHz, D<sub>2</sub>O, referenced to TMS): δ 7.72 (s, 1H), 7.33 (d, *J* = 8.5 Hz, 2H), 6.88 (s, 1H), 6.82 (d, *J* = 8.2 Hz, 1H), 6.77 (d, *J* = 8.7 Hz, 2H), 6.73 (d, *J* = 8.2 Hz, 1H) 4.79 (overlapped with H<sub>2</sub>O, 1H), 4.65 (s, 1H); <sup>1</sup>H NMR (600 MHz, MeOD): δ 7.67 (d, *J* = 2.0 Hz, 1H), 7.29 (d, *J* = 8.8 Hz, 2H), 6.74 (d, *J* = 8.1 Hz, 1H), 6.73 (d, *J* = 2.2 Hz, 1H), 6.70 (d, *J* = 8.7 Hz, 2H), 6.63 (dd, *J* = 8.2, 2.2 Hz, 1H), 4.78 (d, *J* = 2.2 Hz, 1H), 4.51, (s, 1H); <sup>13</sup>C NMR (150 MHz, D<sub>2</sub>O, referenced to TMS): δ 176.4, 176.1, 159.1, 145.4, 144.4, 141.9, 134.3, 133.2, 126.2, 122.7, 120.3, 117.5, 116.6, 115.9, 84.5, 49.0; IR (thin film, cm<sup>-1</sup>): 3420, 2360, 2341, 1733, 1717, 1636, 1603, 1517, 1254, 1191, 1171, 1058, 834; HRMS (ESI): Calculated for [M+Na]<sup>+</sup> C<sub>18</sub>H<sub>14</sub>NaO<sub>7</sub>: 365.0637, Found: 365.0638; [α]<sub>D</sub><sup>26</sup> +171.9 (*c* = 0.14, 5% AcOH/H<sub>2</sub>O).

| Comparison of Physicochemical Properties for Megacerotonic Acid |                                                                                                                                                                                                                                                                                                                                                    |                                                                                                                                                                                                                                                                                     |                                                                                                                                                                                                                                                                                                                                                |
|-----------------------------------------------------------------|----------------------------------------------------------------------------------------------------------------------------------------------------------------------------------------------------------------------------------------------------------------------------------------------------------------------------------------------------|-------------------------------------------------------------------------------------------------------------------------------------------------------------------------------------------------------------------------------------------------------------------------------------|------------------------------------------------------------------------------------------------------------------------------------------------------------------------------------------------------------------------------------------------------------------------------------------------------------------------------------------------|
| Data Type                                                       | Data Reported in Isolation Paper                                                                                                                                                                                                                                                                                                                   | Our Synthetic Sample                                                                                                                                                                                                                                                                | Data Reported for Papin Synthetic Sample                                                                                                                                                                                                                                                                                                       |
| <sup>1</sup> H NMR (D <sub>2</sub> O)                           | <sup>1</sup> H NMR (300 MHz, D <sub>2</sub> O)<br>4.52 (1H, dd, <i>J</i> = 1.6, 3.0 Hz)<br>4.74 (1H, d, <i>J</i> = 3.0 Hz)<br>6.53 (1H, dd, <i>J</i> = 2.0, 6.2 Hz)<br>6.62 (2H, d, <i>J</i> = 6.6 Hz)<br>6.70 (1H, d, <i>J</i> = 6.2 Hz)<br>6.82 (1H, d, <i>J</i> = 2.0 Hz)<br>7.14 (2H, d, <i>J</i> = 6.6 Hz)<br>7.58 (1H, d, <i>J</i> = 1.6 Hz) | <sup>1</sup> H NMR (600 MHz, D <sub>2</sub> O, TMS)<br>4.65 (s, 1H)<br>Overlapped with H <sub>2</sub> O<br>6.73 (d, <i>J</i> = 8.2 Hz, 1H)<br>6.77 (d, <i>J</i> = 8.7 Hz, 2H)<br>6.82 (d, <i>J</i> = 8.2 Hz, 1H)<br>6.88 (s, 1H)<br>7.33 (d, <i>J</i> = 8.5 Hz, 2H)<br>7.72 (s, 1H) | <sup>1</sup> H NMR (400 MHz, D <sub>2</sub> O)<br>4.63 (ddt, <i>J</i> = 2.5 Hz, 1H)<br>4.83 (d, <i>J</i> = 3.1 Hz, 1H)<br>6.66 (dd, <i>J</i> = 8.3, 2.2 Hz, 1H)<br>6.72 (d, <i>J</i> = 8.8 Hz, 2H)<br>6.80 (d, <i>J</i> = 8.3 Hz, 1H)<br>6.87 (d, <i>J</i> = 2.2 Hz, 1H)<br>7.24 (d, <i>J</i> = 8.8 Hz, 2H)<br>7.66 (d, <i>J</i> = 2.0 Hz, 1H) |
| <sup>1</sup> H NMR (MeOD)                                       | Not reported                                                                                                                                                                                                                                                                                                                                       | 4.51 (s, 1H)<br>4.78 (d, <i>J</i> = 2.2 Hz, 1H)<br>6.63 (dd, <i>J</i> = 8.2, 2.2 Hz, 1H)<br>6.70 (d, <i>J</i> = 8.7 Hz, 2H)<br>6.73 (d, <i>J</i> = 2.2 Hz, 1H)<br>6.74 (d, <i>J</i> = 8.1 Hz, 1H)<br>7.29 (d, <i>J</i> = 8.8 Hz, 2H)<br>7.67 (d, <i>J</i> = 2.0 Hz, 1H).            | Not reported                                                                                                                                                                                                                                                                                                                                   |
| <sup>13</sup> C NMR                                             | <sup>13</sup> C NMR (75.5MHz, D <sub>2</sub> O)<br>177.6, 177.5, 161.0, 147.3,<br>146.3, 144.0, 136.2, 134.8,<br>127.8, 123.9, 122.0, 119.3,<br>118.4, 117.8, 85.8, 50.6                                                                                                                                                                           | <sup>13</sup> C NMR (150 MHz, D <sub>2</sub> O)<br>176.4, 176.1, 159.1, 145.4,<br>144.4, 141.9, 134.3, 133.2,<br>126.2, 122.7, 120.3, 117.5,<br>116.6, 115.9, 84.5, 49.0.                                                                                                           | <sup>13</sup> C NMR (100 MHz, acetone- <i>d</i> <sub>6</sub> )<br>172.4, 171.5, 160.6, 146.6,<br>145.7, 139.9, 134.1, 132.7,<br>126.2, 122.5, 119.3, 116.8,<br>116.7, 114.7, 82.0, 48.8                                                                                                                                                        |
| Rotation (5% AcOH)                                              | +233.0 (c 1.66)                                                                                                                                                                                                                                                                                                                                    | +171.9 (c 0.14)                                                                                                                                                                                                                                                                     | NA                                                                                                                                                                                                                                                                                                                                             |
| IR                                                              | 1735                                                                                                                                                                                                                                                                                                                                               | 3420, 2360, 2341, 1733, 1717,<br>1636, 1603, 1517, 1254, 1191,<br>1058, 834                                                                                                                                                                                                         | 1735                                                                                                                                                                                                                                                                                                                                           |
| MS                                                              | 343 (M+H)                                                                                                                                                                                                                                                                                                                                          | 360.1083 (M+Na = 360.1086)                                                                                                                                                                                                                                                          | Not reported                                                                                                                                                                                                                                                                                                                                   |

The spectral properties of synthetic megacerotonic acid vary significantly from both those reported by Takeda in its isolation as well as that reported by Brown, *et al.* in their racemic total synthesis. We were unable to obtain either a natural sample or synthetic sample. We postulate based on our experience with shimobashiric acid A (*vide infra*) that the differences in NMR shifts observed are a result of concentration differences. A concentration vs. chemical shift study (below) appears to support this hypothesis. Finally, we note that our <sup>1</sup>H NMR data for **16a** matches that of the penultimate intermediate in the published racemic synthesis (*vide supra*).

| <sup>1</sup> H NMR shifts of our synthetic sample as a function of concentration (600 MHz, D <sub>2</sub> O) |                                                |
|--------------------------------------------------------------------------------------------------------------|------------------------------------------------|
| Concentration                                                                                                | Resonance (δ)                                  |
| 11.6 mg/mL                                                                                                   | 4.56, 4.73, 6.68, 6.73, 6.78, 6.86, 7.30, 7.67 |
| 5.8 mg/mL                                                                                                    | 4.59, 4.74, 6.72, 6.77, 6.81, 6.87, 7.34, 7.70 |
| 2.9 mg/mL                                                                                                    | 4.60, 4.75, 6.74, 6.78, 6.82, 6.87, 7.36, 7.72 |
| 1.5 mg/mL                                                                                                    | 4.60, 4.75, 6.75, 6.80, 6.83, 6.87, 7.37, 7.73 |
| 0.7 mg/mL                                                                                                    | 4.61, 4.75, 6.77, 6.80, 6.83, 6.87, 7.38, 7.73 |

## Hydrolysis of *Tert*-Butoxycarbonyl $\alpha$ -Benzylidene- $\gamma$ -Butyrolactone **S2**

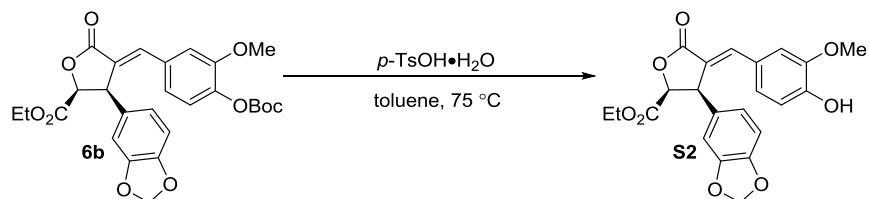

To a scintillation vial were added  $\alpha$ -benzylidene- $\gamma$ -butyrolactone **6b** (50 mg, 0.098 mmol, 1.0 equiv) and toluene (2.0 mL). To the resulting solution was added *p*-toluenesulfonic acid monohydrate (37.1 mg, 0.195 mmol, 2.0 equiv). The resulting mixture was heated to 75 °C. After 4 h the reaction was cooled to room temperature, diluted with 1M HCl (10 mL), and extracted with ethyl acetate (2 x 10 mL). The combined organic extracts were washed with brine, dried ( $\text{Na}_2\text{SO}_4$ ) and concentrated *in vacuo*. The crude product was purified by flash chromatography (30-40% ethyl acetate/hexanes) to give  $\alpha$ -benzylidene- $\gamma$ -butyrolactone **S2** (36 mg, 0.087 mmol, 89%) as a pale yellow, viscous oil. Analytical data for **S2**:  $^1\text{H NMR}$  (600 MHz,  $\text{CDCl}_3$ ):  $\delta$  7.71 (d,  $J = 2.2$  Hz, 1H), 6.95 (dd,  $J = 8.3, 2.0$  Hz, 1H), 6.83 (d,  $J = 8.2$  Hz, 1H), 6.77 (d,  $J = 2.0$  Hz, 1H), 6.73 – 6.69 (m, 2H), 6.67 (d,  $J = 1.6$  Hz, 1H), 5.98 (s, 1H), 5.90 (dd,  $J = 6.9, 1.4$  Hz, 2H), 5.17 (d,  $J = 8.2$  Hz, 1H), 4.79 (dd,  $J = 8.3, 2.2$  Hz, 1H), 3.95 – 3.76 (m, 2H), 3.67 (s, 3H), 1.03 (t,  $J = 7.2$  Hz, 3H);  $^{13}\text{C NMR}$  (150 MHz,  $\text{CDCl}_3$ ):  $\delta$  171.4, 167.2, 148.1, 148.0, 147.4, 146.5, 140.4, 129.6, 126.7, 125.7, 122.3, 121.9, 114.7, 112.3, 108.8, 108.3, 101.3, 78.6, 61.4, 55.9, 47.0, 13.7; **IR** (thin film,  $\text{cm}^{-1}$ ): 3420, 2917, 1750, 1636, 1517, 1164, 736; **TLC** (50% EtOAc/hexanes)  $R_f$ : 0.18; **HRMS** (ESI): Calculated for  $[\text{M}+\text{H}]^+$   $\text{C}_{22}\text{H}_{21}\text{O}_8$ : 413.1236, Found: 413.1233;  $[\alpha]_D^{25} +426.0$  ( $c = 0.11$ , MeOH).

## Epimerization/Hydrolysis of $\alpha$ -Benzylidene- $\gamma$ -Butyrolactone **16b**

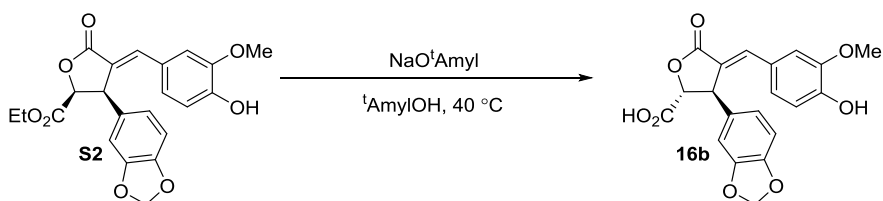

To a flame-dried 10 mL round-bottomed flask were added  $\alpha$ -benzylidene- $\gamma$ -butyrolactone **S1** (20 mg, 0.048 mmol, 1.0 equiv) and *tert*-amyl alcohol (2.5 mL). To the resulting solution, after heating to 40 °C, a solution of sodium *tert*-amylate in *tert*-amyl alcohol (0.87 mL, 0.145 mmol, 3.0 equiv) was added dropwise. After 6.5 h, the reaction was cooled to 0 °C and quenched with 1M HCl (3 mL). The reaction was extracted with ethyl acetate (2 x 5 mL). The combined organic extracts were washed with brine, dried ( $\text{Na}_2\text{SO}_4$ ), and concentrated *in vacuo*. The crude product was purified by flash chromatography (98:2:0.3 dichloromethane:methanol:acetic acid). The residue obtained was taken up in ethyl acetate (10 mL) and washed with water (5 x 8 mL), brine (5 mL), dried ( $\text{Na}_2\text{SO}_4$ ) and concentrated *in vacuo* to give acid **16b** (13.7 mg, 0.036 mmol, 73%, 14:1 dr) as a clear oil. Analytical data for **16b**:  $^1\text{H NMR}$  (600 MHz, Acetone- $d_6$ )  $\delta$  7.67 (d,  $J = 1.5$  Hz, 1H), 7.09 (dd,  $J = 8.3, 2.1$  Hz, 1H), 7.02 (d,  $J = 2.0$  Hz, 1H), 6.92 – 6.85 (m, 3H), 6.82 (d,  $J =$

8.2 Hz, 1H), 6.00 (dd,  $J = 7.3, 1.1$  Hz, 2H), 4.82 (s, 2H), 3.66 (s, 3H).  $^{13}\text{C}$  NMR (150 MHz,  $\text{CDCl}_3$ ):  $\delta$  172.1, 171.5, 150.0, 149.5, 148.3, 148.2, 140.5, 135.2, 127.2, 126.4, 122.2, 121.3, 116.1, 114.2, 109.6, 108.1, 102.4, 81.8, 56.2, 48.8; IR (thin film,  $\text{cm}^{-1}$ ): 3502, 2917, 2360, 1749, 1716, 1636, 1518, 1254, 1163, 1036, 817; TLC (94.5:5:0.1  $\text{CH}_2\text{Cl}_2$ :MeOH:AcOH)  $R_f$  : 0.27; HRMS (ESI): Calculated for  $[\text{M}+\text{H}]^+$   $\text{C}_{20}\text{H}_{17}\text{O}_8$ : 385.0923, Found: 385.0919;  $[\alpha]_D^{25}$  +222.6 ( $c = 0.17$ , MeOH).

### Preparation of Shimobashiric Acid A 1b

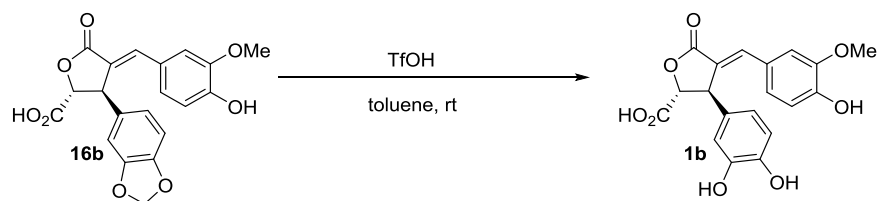

To a solution of acid **16b** (9.6 mg, 0.025 mmol) in toluene (2.0 mL) at room temperature was added trifluoromethanesulfonic acid (excess, ~20 drops). After 2 min, the reaction was diluted with water (5 mL) and extracted with ethyl acetate (2 x 5 mL). The combined organic extracts were washed with brine, dried ( $\text{Na}_2\text{SO}_4$ ) and concentrated. A portion of the crude product (5/6) was purified by semi-preparative HPLC (A: 10 mM  $\text{NH}_4\text{OAc}$  in water, B: 90:10 acetonitrile:10 mM  $\text{NH}_4\text{OAc}$  in water; A:B 90:10 to 50:50 over 41 min). The fractions collected were concentrated on rotatory evaporator to remove acetonitrile and extracted with ethyl acetate (10 mL). The aqueous layer was brought to pH=0 with concentrated sulfuric acid and extracted with ethyl acetate (2 x 10 mL). The combined organic extracts (excluding the first) were washed with brine, dried ( $\text{Na}_2\text{SO}_4$ ) and concentrated to yield shimobashiric acid A **1b** (4.5 mg, 0.012 mmol, 48%) as a colorless oil. Analytical data for **1b**:  $^1\text{H}$  NMR (600 MHz, MeOD):  $\delta$  7.68 (d,  $J = 2.0$  Hz, 1H), 6.98 (dd,  $J = 8.3, 2.0$  Hz, 1H), 6.88 (d,  $J = 2.0$  Hz, 1H), 6.77 – 6.75 (m, 2H), 6.75 (d,  $J = 6.6$  Hz, 1H), 6.66 (dd,  $J = 8.2, 2.2$  Hz, 1H), 4.78 (d,  $J = 2.3$  Hz, 1H), 4.54 (d,  $J = 2.3$  Hz, 1H), 3.55 (s, 3H);  $^{13}\text{C}$  NMR (150 MHz, MeOD)  $\delta$  174.4, 173.2, 150.7, 149.0, 147.3, 146.3, 141.8, 132.9, 128.0, 126.7, 122.0, 119.2, 117.1, 116.4, 114.9, 114.1, 83.1, 56.3, 49.7; IR (thin film,  $\text{cm}^{-1}$ ): 3392, 2919, 2849, 1734, 1635, 1597, 1518, 1289, 1204, 1179, 1059, 820; HRMS (ESI): Calculated for  $[\text{M}+\text{Na}]^+$   $\text{C}_{19}\text{H}_{16}\text{NaO}_8$ : 395.0743, Found: 395.0740;  $[\alpha]_D^{26}$  +295.6 ( $c = 0.20$ , MeOH).

| Comparison of Physicochemical Properties for Shimobashiric Acid A |                                                                                                                                                                                                                                                                                                                                                               |                                                                                                                                                                                                                                                                                                                                                |                                                                                                                                                                                                                                                                                                                                  |
|-------------------------------------------------------------------|---------------------------------------------------------------------------------------------------------------------------------------------------------------------------------------------------------------------------------------------------------------------------------------------------------------------------------------------------------------|------------------------------------------------------------------------------------------------------------------------------------------------------------------------------------------------------------------------------------------------------------------------------------------------------------------------------------------------|----------------------------------------------------------------------------------------------------------------------------------------------------------------------------------------------------------------------------------------------------------------------------------------------------------------------------------|
| Data Type                                                         | Data Reported in Isolation Paper                                                                                                                                                                                                                                                                                                                              | Our Synthetic Sample                                                                                                                                                                                                                                                                                                                           | Obtained Natural Sample                                                                                                                                                                                                                                                                                                          |
| <sup>1</sup> H NMR (MeOD)                                         | <sup>1</sup> H NMR (400 MHz, MeOD)<br>3.56 (s, 3H)<br>4.55 (bs, 1H)<br>4.78 (overlapped, 1H)<br>6.67 (dd, <i>J</i> = 8.0, 2.0 Hz, 1H)<br>6.75 (d, <i>J</i> = 8.5 Hz, 1H)<br>6.77 (d, <i>J</i> = 2.0 Hz, 1H)<br>6.77 (d, <i>J</i> = 8.0 Hz, 1H)<br>6.89 (d, <i>J</i> = 2.0 Hz, 1H)<br>6.99 (dd, <i>J</i> = 8.5, 2.0 Hz, 1H)<br>7.68 (d, <i>J</i> = 2.0 Hz, 1H) | <sup>1</sup> H NMR (600 MHz, MeOD)<br>3.55 (s, 3H)<br>4.54 (d, <i>J</i> = 2.3 Hz, 1H)<br>4.78 (d, <i>J</i> = 2.3 Hz, 1H)<br>6.66 (dd, <i>J</i> = 8.2, 2.2 Hz, 1H)<br>6.75 (d, <i>J</i> = 6.6 Hz, 1H)<br>6.77 – 6.75 (m, 2H)<br><br>6.88 (d, <i>J</i> = 2.0 Hz, 1H)<br>6.98 (dd, <i>J</i> = 8.3, 2.0 Hz, 1H)<br>7.68 (d, <i>J</i> = 2.0 Hz, 1H) | <sup>1</sup> H NMR (600 MHz, MeOD)<br>3.55 (s, 3H)<br>4.52 (s, 1H)<br>4.59 (d, <i>J</i> = 2.2 Hz, 1H)<br>6.68 (dd, <i>J</i> = 8.1, 2.2 Hz, 1H)<br>6.73 (s, 1H)<br>6.74 (s, 1H)<br>6.81 (d, <i>J</i> = 2.2 Hz, 1H)<br>6.90 (d, <i>J</i> = 2.0 Hz, 1H)<br>6.96 (dd, <i>J</i> = 8.1, 2.0 Hz, 1H)<br>7.61 (d, <i>J</i> = 2.1 Hz, 1H) |
| <sup>13</sup> C NMR (MeOD)                                        | <sup>13</sup> C NMR (100 MHz, MeOD)<br>174.5, 173.7, 150.7, 149.1,<br>147.4, 146.3, 141.7, 133.7,<br>128.0, 126.9, 122.5, 119.4,<br>117.2, 116.4, 115.1, 114.3,<br>83.6, 56.4, 49.5                                                                                                                                                                           | <sup>13</sup> C NMR (150 MHz, MeOD)<br>174.4, 173.2, 150.7, 149.0,<br>147.3, 146.3, 141.8, 132.9,<br>128.0, 126.7, 122.0, 119.2,<br>117.1, 116.4, 114.9, 114.1,<br>83.1, 56.3, 49.7                                                                                                                                                            | NA                                                                                                                                                                                                                                                                                                                               |
| Rotation (MeOH)                                                   | +205.0 (c 0.16)                                                                                                                                                                                                                                                                                                                                               | +295.6 (c 0.20)                                                                                                                                                                                                                                                                                                                                | NA                                                                                                                                                                                                                                                                                                                               |
| IR                                                                | Not Reported                                                                                                                                                                                                                                                                                                                                                  | 3392, 2919, 2849, 1734, 1635,<br>1597, 1518, 1289, 1204, 1179,<br>1059, 820                                                                                                                                                                                                                                                                    | NA                                                                                                                                                                                                                                                                                                                               |
| MS                                                                | 373.0928                                                                                                                                                                                                                                                                                                                                                      | 373.0921 (M+H = 373.0923)                                                                                                                                                                                                                                                                                                                      | NA                                                                                                                                                                                                                                                                                                                               |

The data reported by Murata and coworkers for natural shimobashiric acid A agrees well with data obtained with our synthetic sample. We obtained a natural sample of shimobashiric acid A (~0.16 mg) from Murata and the <sup>1</sup>H NMR spectrum of this sample varied significantly for several resonances relative to those reported in its isolation (e.g. 4.58 ppm vs 4.78 ppm). Postulating the presence of concentration dependent shifts, we analyzed an equal mixture of natural (0.08 mg) and synthetic shimobashiric acid A (0.08 mg) by <sup>1</sup>H NMR spectroscopy. This analysis clearly showed coalescence of the resonances in question, indicating concentration dependent changes in NMR resonances. This feature may be relevant in the analysis of megacerotonic acid (*vide supra*).



## Preparation of $\gamma$ -Butyrolactone 4

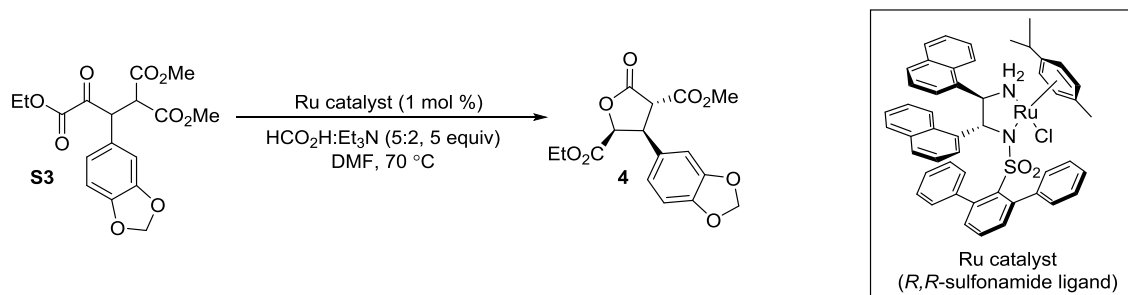

To a flame-dried 250 mL round-bottomed flask equipped with magnetic stir bar were added [RuCl<sub>2</sub>(p-cymene)]<sub>2</sub> (65.6 mg, 0.107 mmol, 0.005 equiv), ligand **L1** (259 mg, 0.428 mmol, 0.02 equiv), and anhydrous DMF (30 mL). The resulting solution was stirred under a N<sub>2</sub> atmosphere at 70 °C. After 1 h, the reaction solution was cooled to room temperature and a solution of  $\alpha$ -keto- $\beta$ -aryl ester **S3** (7.85 g, 21.4 mmol, 1.0 equiv) in DMF (20 mL) was added. The reaction solution was diluted with DMF (57 mL) and formic acid:triethylamine azeotrope (5:2, 9.3 mL, 107 mmol, 5.0 equiv) was added. The resulting solution was heated to 70 °C. After 20 h, the reaction was cooled to room temperature and diluted with water (200 mL) and extracted with ethyl acetate (250 mL, 50 mL). The combined organic extracts were washed with water (2 x 150 mL), brine (75 mL), dried (Na<sub>2</sub>SO<sub>4</sub>) and concentrated to give crude  $\gamma$ -butyrolactone **4** as a 19:1 mixture of diastereomers. The diastereomer ratio was determined by <sup>1</sup>H NMR spectroscopic analysis of the crude reaction mixture by comparison of the integration of resonances at  $\delta$  5.11 (major diastereomer) and  $\delta$  4.82 (minor diastereomer). **HPLC Analysis:** Chiralpak IB column, 15% Isopropanol/Hexanes, 1.0 mL/min, 210 nm;  $t_{\text{major}} = 15.2$  min  $t_{\text{minor}} = 18.4$  min, 90:10 er.

The crude product was eluted over a plug of silica gel with a mixture of ethyl acetate/hexanes (30/70, 300 mL). The resulting oil was recrystallized from diethyl ether/hexanes to yield  $\gamma$ -butyrolactone **4** (3.55 g, 10.6 mmol, 49% yield, >20:1 dr) as white crystalline solid. Analytical data for **4**: **<sup>1</sup>H NMR** (600 MHz, CDCl<sub>3</sub>):  $\delta$  6.76 (d,  $J = 7.8$  Hz, 1H), 6.68-6.66 (m, 2H), 5.95 (s, 2H), 5.12 (d,  $J = 8.5$  Hz, 1H), 4.41 (dd,  $J = 11.5, 8.5$  Hz, 1H), 4.13 (d,  $J = 11.5$  Hz, 1H), 4.00-3.94 (m, 1H), 3.92-3.87 (m, 1H), 3.79 (s, 3H), 0.97 (t,  $J = 7.1$  Hz, 3H); **<sup>13</sup>C NMR** (150 MHz, CDCl<sub>3</sub>):  $\delta$  170.3, 167.7, 167.2, 148.2, 147.8, 126.1, 120.9, 108.6, 107.8, 101.4, 78.9, 61.8, 53.3, 49.1, 47.6, 13.7; **IR** (thin film, cm<sup>-1</sup>): 1793, 1741, 1507, 1143, 1038; **m.p.** 85-87 °C; **TLC** (30% EtOAc/hexanes)  $R_f$ : 0.26; **HRMS** (ESI): Calculated for [M+Na]<sup>+</sup> C<sub>16</sub>H<sub>16</sub>NaO<sub>8</sub>: 359.0743, Found: 359.0738; **HPLC Analysis:** Chiralpak IB column, 15% Isopropanol/Hexanes, 1.0 mL/min, 210 nm;  $t_{\text{major}} = 15.2$  min  $t_{\text{minor}} = 18.4$  min, 93:7 er;  $[\alpha]_D^{25} +195.8$  ( $c = 0.25$ , MeOH).

## Preparation of $\gamma$ -Butyrolactone 5

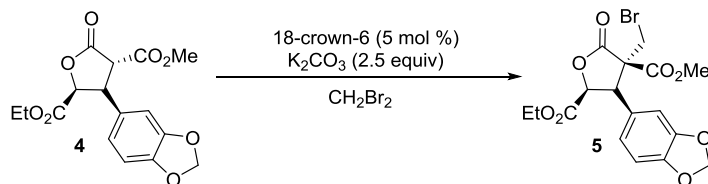

To a 1-dram vial were added  $\gamma$ -butyrolactone **4**, potassium carbonate (51.4 mg, 0.372 mmol, 2.5 equiv), 18-crown-6 (2.0 mg, 0.007 mmol, 0.05 equiv), and dibromomethane (0.5 mL). The resulting slurry was stirred vigorously. After 4.5 days, the reaction was partitioned between ethyl acetate (5 mL) and water (5 mL). The aqueous layer was separated and extracted with ethyl acetate (5 mL). The combined organic extracts were washed with brine (5 mL), dried (Na<sub>2</sub>SO<sub>4</sub>) and concentrated to give crude  $\gamma$ -butyrolactone **5** as a single diastereomer. Flash chromatography (25-30% ethyl acetate/hexanes) provided  $\gamma$ -butyrolactone **5** (55.8 mg, 0.130 mmol, 87% yield) as white solid. Analytical data for **5**: <sup>1</sup>H NMR (600 MHz, CDCl<sub>3</sub>):  $\delta$  6.71-6.69 (m, 1H), 6.64-6.63 (m, 2H), 5.93 (d,  $J$  = 1.3 Hz, 1H), 5.36 (d,  $J$  = 8.4 Hz, 1H), 4.14 (d,  $J$  = 8.4 Hz, 1H), 4.02-3.94 (m, 3H), 3.90 (d,  $J$  = 10.8 Hz, 1H), 3.43 (s, 3H), 0.97 (t,  $J$  = 7.1 Hz, 3H); <sup>13</sup>C NMR (150 MHz, CDCl<sub>3</sub>):  $\delta$  170.3, 166.3, 166.2, 147.8, 147.6, 127.3, 122.8, 109.2, 108.1, 101.4, 78.1, 61.7, 61.6, 52.9, 52.3, 33.1, 13.7; IR (thin film, cm<sup>-1</sup>): 2983, 1799, 1742, 1490, 1447, 1038, 736; m.p. 130-132 °C; TLC (30% EtOAc/hexanes) R<sub>f</sub> : 0.21; HRMS (ESI): Calculated for [M+Na]<sup>+</sup> C<sub>17</sub>H<sub>17</sub>BrNaO<sub>8</sub>: 451.0004, Found: 451.0001; [ $\alpha$ ]<sub>D</sub><sup>25</sup> +110.3 ( $c$  = 0.20, MeOH).

## Preparation of $\alpha$ -Methylidene- $\gamma$ -Butyrolactone 2

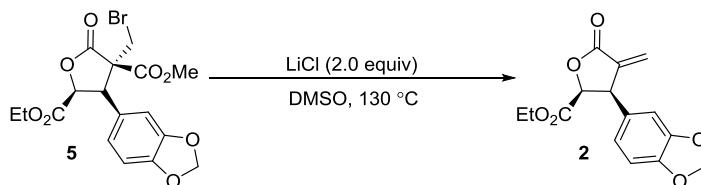

To a 20 mL scintillation vial were added  $\gamma$ -butyrolactone **5** (639.5 mg, 1.49 mmol, 1.0 equiv), lithium chloride (126 mg, 2.98 mmol, 2.0 equiv), and anhydrous DMSO (10 mL). The reaction vial was purged with N<sub>2</sub> and heated to 130 °C. After 5.5 h the reaction was cooled to room temperature and partitioned between ethyl acetate (25 mL) and water (25 mL). The aqueous layer was separated and extracted with ethyl acetate (15 mL). The combined organic extracts were washed with water (10 mL), brine (10 mL), dried (Na<sub>2</sub>SO<sub>4</sub>) and concentrated. Flash chromatography (20-30% ethyl acetate/hexanes) provided  $\alpha$ -methylidene- $\gamma$ -butyrolactone **2** (245 mg, 0.844 mmol, 57% yield) as a viscous very pale orange oil. Analytical data for **2**: <sup>1</sup>H NMR (600 MHz, CDCl<sub>3</sub>):  $\delta$  6.77 (d,  $J$  = 8.0 Hz, 1H), 6.68 (dd,  $J$  = 8.0, 1.8 Hz, 1H), 6.64 (d,  $J$  = 1.8 Hz, 1H), 6.51 (d,  $J$  = 3.3 Hz, 1H), 5.95 (d,  $J$  = 1.8 Hz, 2H), 5.62 (d,  $J$  = 3.0 Hz, 1H), 5.13 (d,  $J$  = 9.3 Hz, 1H), 4.52 (dt,  $J$  = 9.3, 3.1 Hz, 1H), 3.94-3.89 (m, 1H), 3.84-3.79 (m, 1H), 0.97 (t,  $J$  = 7.2 Hz, 3H); <sup>13</sup>C NMR (150 MHz, CDCl<sub>3</sub>):  $\delta$  169.2, 167.7, 148.0, 147.6, 135.9, 128.6, 125.0, 122.7, 108.9, 108.4, 101.3, 78.4, 61.6, 48.3, 13.7; IR (thin film, cm<sup>-1</sup>): 2985, 2904, 1780, 1746,

1490, 1446, 1095, 1068, 1038, 736; **TLC** (30% EtOAc/hexanes)  $R_f$  : 0.26; **HRMS** (ESI): Calculated for  $[M+H]^+$   $C_{15}H_{15}O_6$ : 291.0869, Found: 291.0864  $[\alpha]_D^{25} +256.2$  ( $c = 0.13$ , MeOH).

### **Preparation of $\alpha$ -Benzylidene- $\gamma$ -Butyrolactone 6a Via Heck Coupling**

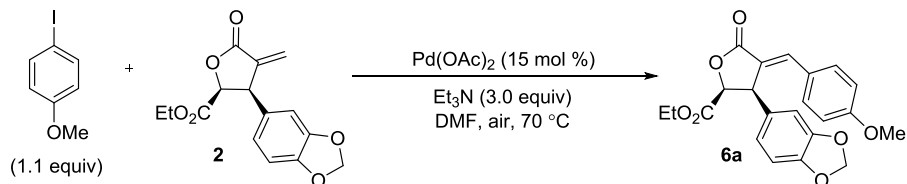

To a flame-dried 1-dram vial equipped with magnetic stir bar were added  $\alpha$ -methylene- $\gamma$ -butyrolactone **2** (26 mg, 0.09 mmol, 1.0 equiv), 4-iodoanisole (23.4 mg, 0.10 mmol, 1.1 equiv), palladium(II) acetate (3.0 mg, 0.013 mmol, 15 mol %) and DMF (400  $\mu$ L) under an atmosphere of air. Triethylamine (38  $\mu$ L, 0.27 mmol, 3.0 equiv) was added and the resulting mixture heated to 70 °C. After 20 h, the reaction was cooled to rt and diluted with ethyl acetate (5 mL), washed with water (2 x 5 mL), brine (5 mL), dried (Na<sub>2</sub>SO<sub>4</sub>) and concentrated. The crude product was purified by flash chromatography to yield **6a** (6.6 mg, 0.017 mmol, 19%) as a clear oil. Analytical data for **6a** matched that reported above.

### **Attempt 1 at Preparation of $\alpha$ -Benzylidene- $\gamma$ -Butyrolactone 6a Via Cross Metathesis**

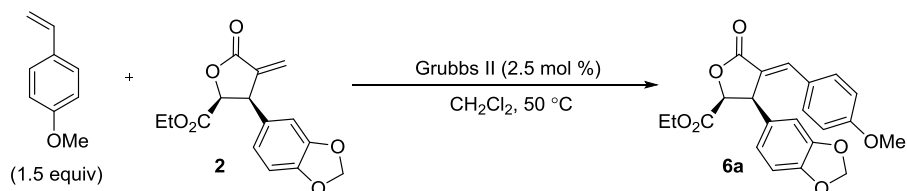

To a flame-dried 1-dram vial sealed with Teflon puncture cap under N<sub>2</sub> equipped with magnetic stir bar containing Grubbs second generation catalyst (1.8 mg, 0.002 mmol, 2.5 mol %) was added a solution of  $\alpha$ -methylene- $\gamma$ -butyrolactone **2** (25 mg, 0.09 mmol, 1.0 equiv) and 4-vinylanisole (17  $\mu$ g, 0.13 mmol, 1.5 equiv) in dichloromethane (200  $\mu$ L) at room temperature. The resulting solution was heated to 50 °C. After 20 h the reaction was concentrated on rotary evaporator. <sup>1</sup>H NMR of the crude product showed no conversion of  $\alpha$ -methylene- $\gamma$ -butyrolactone **2** to desired product **6a**.

### **Attempt 2 at Preparation of $\alpha$ -Benzylidene- $\gamma$ -Butyrolactone 6a Via Cross Metathesis**

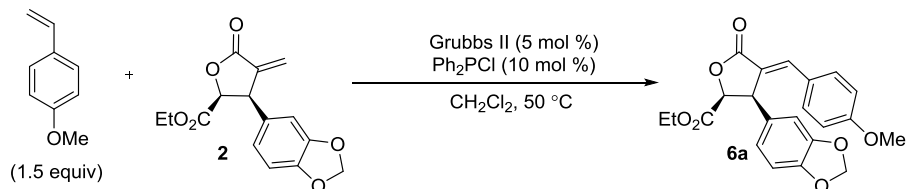

To a flame-dried 1-dram vial sealed with Teflon puncture cap under N<sub>2</sub> equipped with magnetic stir bar containing Grubbs second generation catalyst (3.6 mg, 0.004 mmol, 5.0 mol %) and

chlorodiphenylphosphine (1.2  $\mu\text{L}$ , 0.10 mmol, 10 mol %) was added a solution of  $\alpha$ -methylene- $\gamma$ -butyrolactone **2** (25 mg, 0.09 mmol, 1.0 equiv) and 4-vinylanisole (17  $\mu\text{g}$ , 0.13 mmol, 1.5 equiv) in dichloromethane (200  $\mu\text{L}$ ) at room temperature. The resulting solution was heated to 50  $^{\circ}\text{C}$ . After 20 h the reaction was concentrated on rotary evaporator.  $^1\text{H}$  NMR of the crude product showed no conversion of  $\alpha$ -methylene- $\gamma$ -butyrolactone **2** to desired product **6a**.

### Preparation of $\gamma$ -Butyrolactone 7

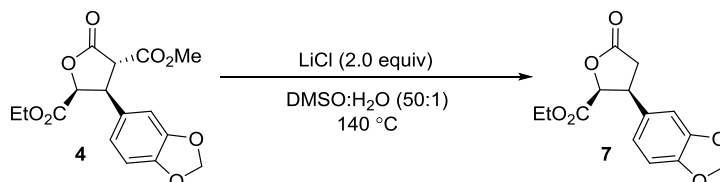

To a 100 mL round-bottomed flask were added  $\gamma$ -butyrolactone **4** (1.00 g, 2.97 mmol, 1.0 equiv), lithium chloride (252 mg, 5.95 mmol, 2.0 equiv), anhydrous DMSO (30 mL), and water (0.6 mL). The reaction flask was purged with N<sub>2</sub> and heated to 140  $^{\circ}\text{C}$ . After 19 h, the reaction was cooled to room temperature and partitioned between ethyl acetate (50 mL) and water (50 mL). The aqueous layer was separated and extracted with ethyl acetate (25 mL). The combined organic extracts were washed with water (2 x 20 mL), brine (15 mL), dried (Na<sub>2</sub>SO<sub>4</sub>) and concentrated. Flash chromatography (30% ethyl acetate/hexanes) provided  $\gamma$ -butyrolactone **7** (723 mg, 2.60 mmol, 87% yield) as a pale yellow solid. Analytical data for **7**:  $^1\text{H}$  NMR (600 MHz, CDCl<sub>3</sub>):  $\delta$  6.75 (d,  $J$  = 7.9 Hz, 1H), 6.68-6.65 (m, 2H), 5.94 (s, 2H), 5.07 (d,  $J$  = 8.2 Hz, 1H), 4.03-3.98 (m, 2H), 3.98-3.92 (m, 1H), 3.90-3.85 (m, 1H), 2.98 (dd,  $J$  = 17.3, 10.1 Hz, 1H), 2.81 (dd,  $J$  = 17.3, 8.7 Hz, 1H), 0.97 (t,  $J$  = 7.1 Hz, 3H);  $^{13}\text{C}$  NMR (150 MHz, CDCl<sub>3</sub>):  $\delta$  175.1, 167.9, 148.0, 147.4, 128.4, 120.8, 108.4, 107.8, 101.3, 80.1, 61.4, 43.8, 32.5, 13.7; IR (thin film, cm<sup>-1</sup>): 2984, 2904, 1793, 1742, 1506, 1447, 1038, 818; m.p. 80-81  $^{\circ}\text{C}$ ; TLC (30% EtOAc/hexanes) R<sub>f</sub>: 0.21; HRMS (ESI): Calculated for [M+H]<sup>+</sup> C<sub>14</sub>H<sub>15</sub>O<sub>6</sub>: 279.0869, Found: 279.0866; [ $\alpha$ ]<sub>D</sub><sup>25</sup> +118.5 ( $c$  = 0.22, MeOH).

### Preparation of $\gamma$ -Butyrolactone 8a Via Aldol Reaction

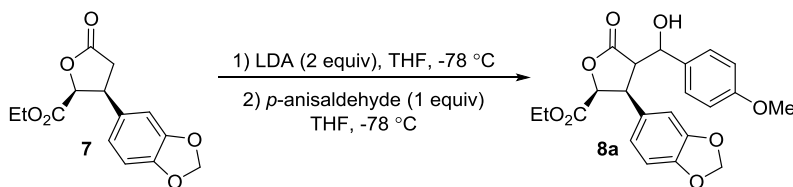

To a flame-dried 1 dram vial equipped with magnetic stir bar containing diisopropylamine (53  $\mu\text{L}$ , 0.38 mmol, 2.1 equiv) at 0  $^{\circ}\text{C}$  was added a solution of *n*-butyl lithium in hexanes (0.21 mL, 2.0 equiv). After 15 min, tetrahydrofuran (0.4 mL) was added. The resulting solution was cooled to -78  $^{\circ}\text{C}$  and a solution of  $\gamma$ -butyrolactone **7** (50 mg, 0.180 mmol, 1.0 equiv) in tetrahydrofuran (1.0 mL) was added dropwise. After 15 min, neat *p*-anisaldehyde (22  $\mu\text{L}$ , 0.180 mmol, 1.0 equiv) was added dropwise. After 10 min, the reaction was quenched with aqueous saturated ammonium chloride (2 mL) and allowed to warm to room temperature. The resulting mixture

was diluted with water (2 mL) and extracted with ethyl acetate (2 x 5 mL). The combined organic extracts were washed with brine, dried (Na<sub>2</sub>SO<sub>4</sub>) and concentrated. Flash chromatography (20-40% ethyl acetate/hexanes) provided **8a** (33 mg, 0.079 mmol, 44%) as a 2:1 mixture of diastereomers.

### Preparation of $\alpha$ -Benzylidene- $\gamma$ -Butyrolactone **6a** Via Elimination

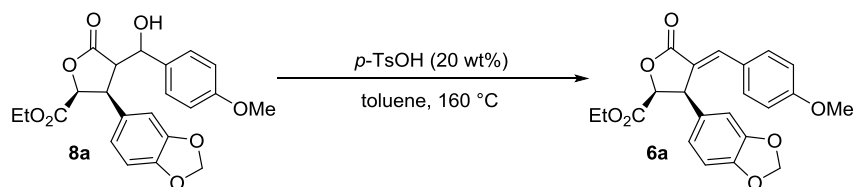

To a solution of alcohol **8a** (27 mg, 0.065 mmol, 1.0 equiv) in toluene (5 mL) was added *p*-toluenesulfonic acid (5 mg, 20 wt%). The resulting mixture was heated to 160 °C under nitrogen. After 1 h the reaction was cooled to room temperature and concentrated. Flash chromatography (30% ethyl acetate/hexanes) provided **6a** (13.4 mg, 0.034 mmol, 52%, >20:1 *E:Z*) as a clear oil. Analytical data for **6a** matched that shown above.

### References

- (1) Evans, D. A.; Burgey, C. S.; Paras, N. A.; Vojkovsky, T.; Tregay, S. W. *J. Am. Chem. Soc.* **1998**, *120*, 5824.
- (2) Kim, H.; Nguyen, Y.; Yen, C. P.-H.; Chagal, L.; Lough, A. J.; Kim, B. M.; Chin, J. *J. Am. Chem. Soc.* **2008**, *130*, 12184.
- (3) Steward, K. M.; Gentry, E. C.; Johnson, J. S. *J. Am. Chem. Soc.* **2012**, *134*, 7329.
- (4) Chiaradia, L. D.; Mascarello, A.; Purificacao, M.; Vernal, J.; Cordeiro, M. N. S.; Zenteno, M. E.; Villarino, A.; Nunes, R. J.; Yunes, R. A.; Terenzi, H. *Bioorg. Med. Chem. Lett.* **2008**, *18*, 6227.
- (5) Brown, E.; Dhal, R.; Papin, N. *Tetrahedron* **1995**, *51*, 13061.

# X. NMR Spectra

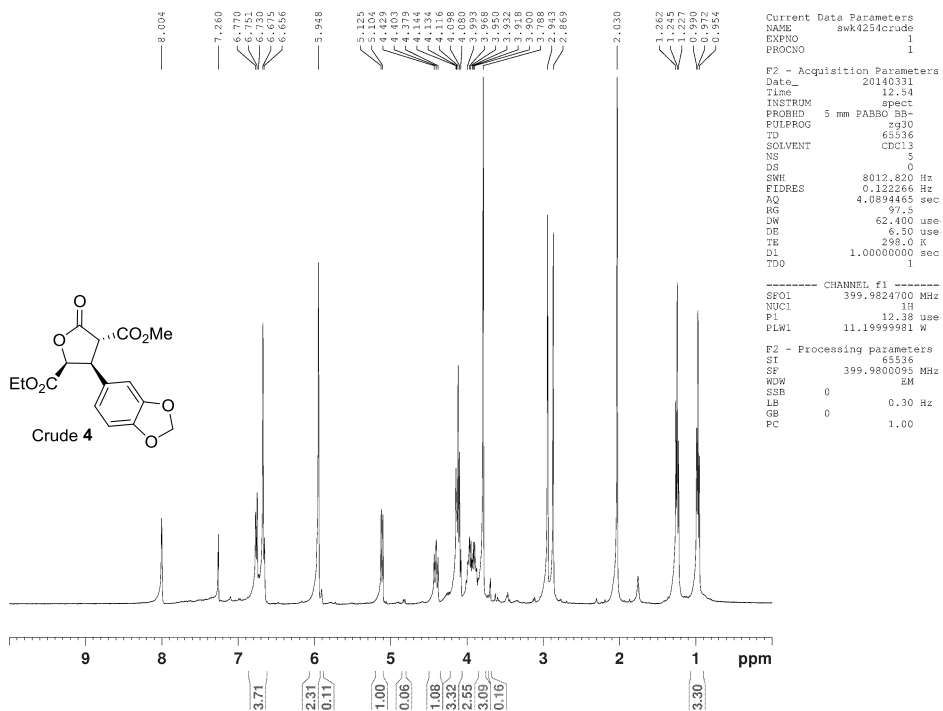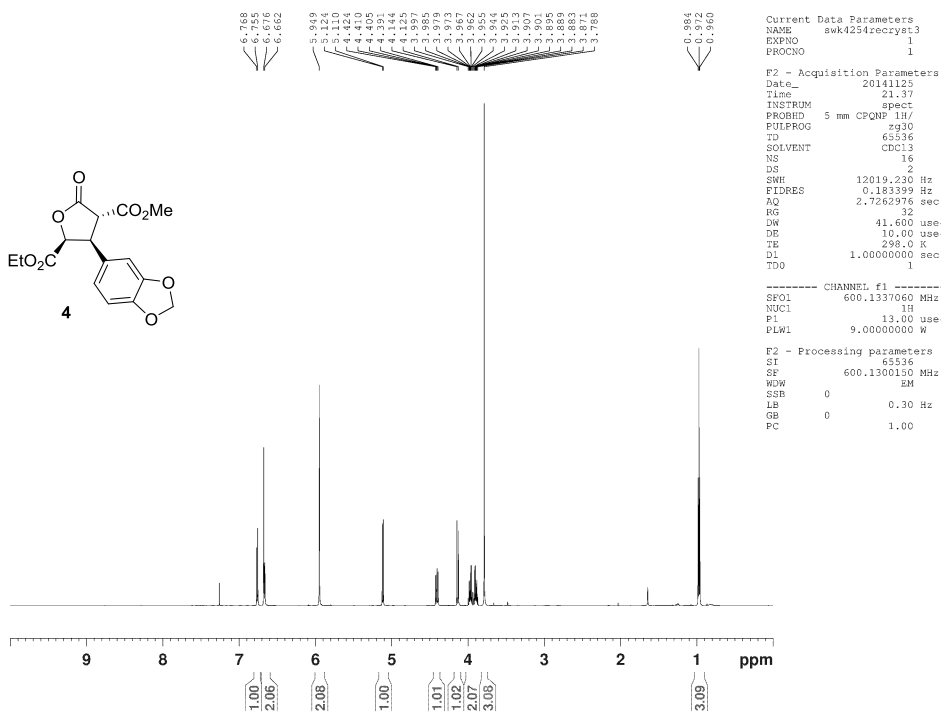

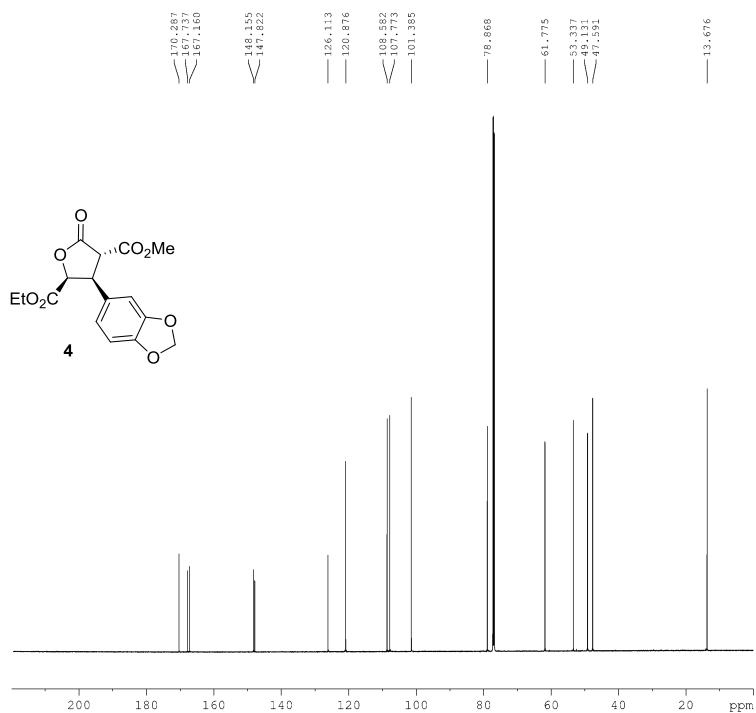

Current Data Parameters  
 NAME swk4254recryst3  
 EXPNO 2  
 PROCNO 1

F2 - Acquisition Parameters  
 Date\_ 20141125  
 Time 21.51  
 INSTRUM spect  
 PROBHD 5 mm CPQNP 1H/  
 PULPROG zgpg30  
 TD 65536  
 SOLVENT CDCl3  
 NS 256  
 DS 4  
 SWH 36057.691 Hz  
 FIDRES 0.550197 Hz  
 AQ 0.9087659 sec  
 RG 203  
 DW 13.867 usec  
 DE 18.00 usec  
 TE 298.0 K  
 D1 2.0000000 sec  
 D11 0.0300000 sec  
 TDO 1

----- CHANNEL f1 -----  
 SFO1 150.9178981 MHz  
 NUC1 13C  
 P1 11.93 usec  
 PLW1 30.0000000 W

----- CHANNEL f2 -----  
 SFO2 600.1324005 MHz  
 NUC2 1H  
 CPDPRG2 waltz16  
 PCPD2 80.00 usec  
 PLW2 9.0000000 W  
 PLW12 0.26587000 W  
 PLW13 0.17016000 W

F2 - Processing parameters  
 SI 32768  
 SF 150.9028184 MHz  
 WDW EM  
 SSB 0  
 LB 1.00 Hz  
 GB 0  
 PC 1.40

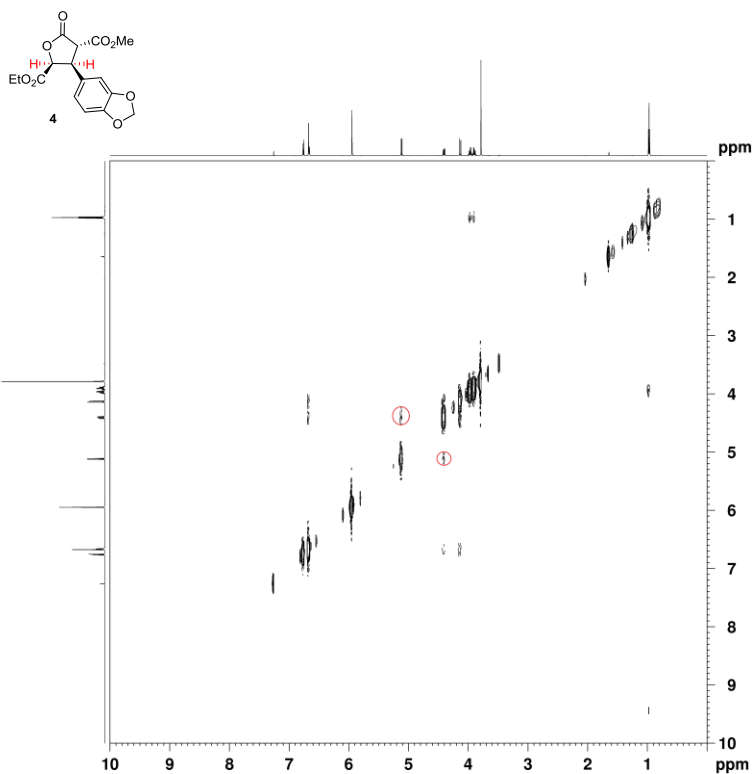

Current Data Parameters  
 NAME swk4254recryst3  
 EXPNO 3  
 PROCNO 1

F2 - Acquisition Parameters  
 Date\_ 20141125  
 Time 21.52  
 INSTRUM spect  
 PROBHD 5 mm CPQNP 1H/  
 PULPROG noesypphpg  
 TD 2048  
 SOLVENT CDCl3  
 NS 4  
 DS 32  
 SWH 6009.615 Hz  
 FIDRES 2.934382 Hz  
 AQ 0.1703936 sec  
 RG 64  
 DW 83.200 usec  
 DE 10.00 usec  
 TE 298.0 K  
 D0 0.0000665 sec  
 D1 2.0000000 sec  
 D8 0.3000001 sec  
 D11 0.0300000 sec  
 D12 0.0000200 sec  
 D16 0.0000200 sec  
 LNO 0.0001640 sec

----- CHANNEL f1 -----  
 SFO1 600.1327625 MHz  
 NUC1 1H  
 P1 13.00 usec  
 P2 26.00 usec  
 P17 2500.00 usec  
 PLW1 9.0000000 W  
 PLW10 2.2500000 W

----- GRADIENT CHANNEL -----  
 GPNAM111 SMSG10.100  
 GP1 40.00 %  
 P16 1000.00 usec

F1 - Acquisition parameters  
 TD 128  
 SFO1 600.1328 MHz  
 FIDRES 46.950119 Hz  
 SW 10.014 ppm  
 F0MODE States-TFPI

F2 - Processing parameters  
 SI 1024  
 SF 600.1300108 MHz  
 WDW QSINE  
 SSB 2  
 LB 0 Hz  
 GB 0  
 PC 1.00

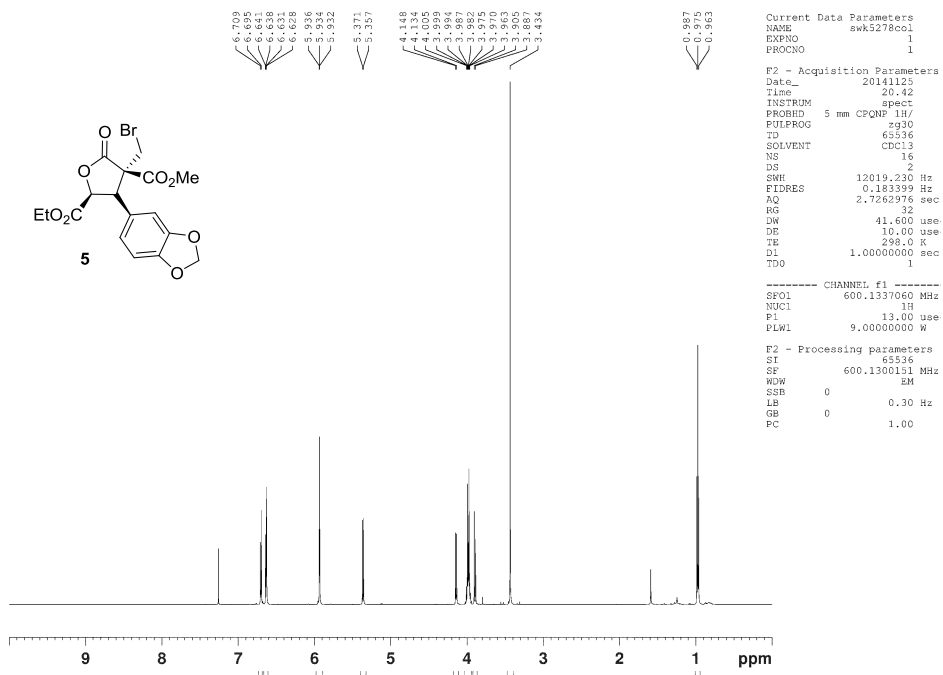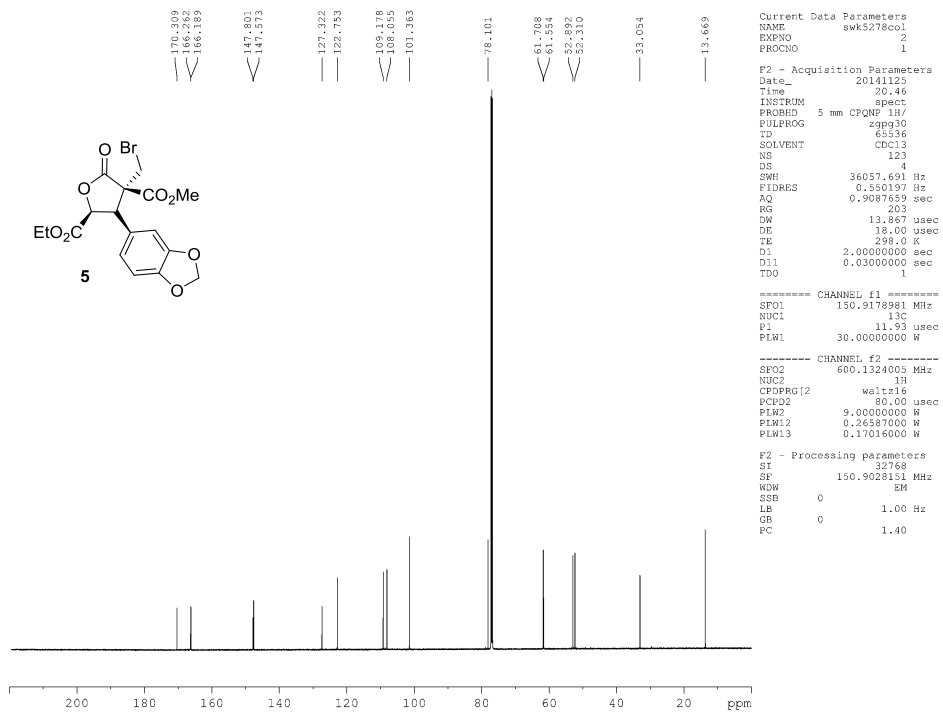



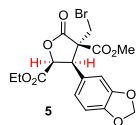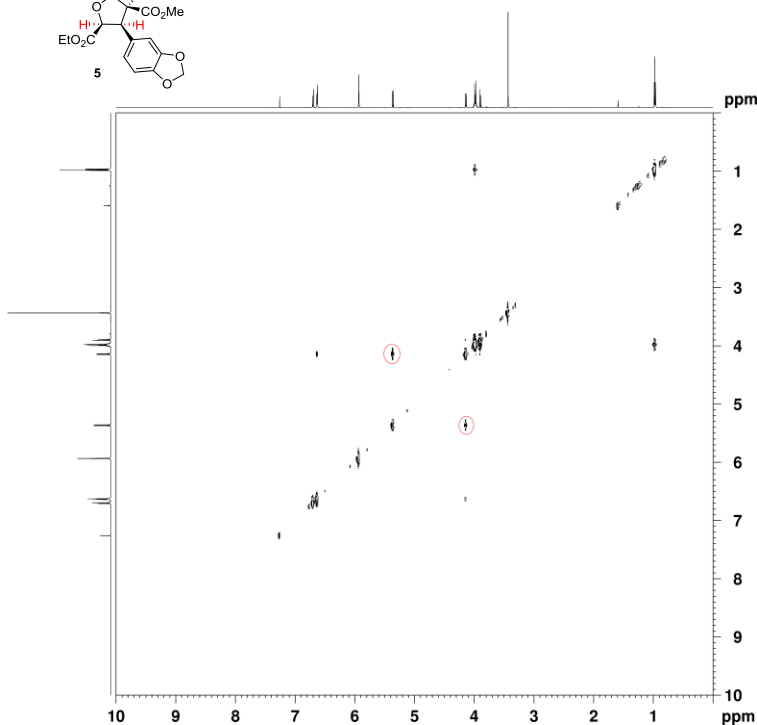

```

Current Data Parameters
Date_ 20141125
Time 20.52
INSTRUM spect
PROBHD 5 mm CPQNP 1H/
PULPROG noesypphpgp
TD 2048
SOLVENT CDCl3
NS 4
DS 32
SWH 6009.619 Hz
FIDRES 2.934382 Hz
AQ 0.1703936 sec
RG 144
DW 83.200 usec
DE 10.00 usec
TE 298.0 K
D0 0.00006665 sec
D1 2.00000000 sec
D8 0.30000001 sec
D11 0.03000000 sec
D12 0.00002000 sec
D16 0.00020000 sec
INO 0.00016640 sec

----- CHANNEL f1 -----
SF01 600.1327625 MHz
NUC1 1H
P1 13.00 usec
P2 26.00 usec
P17 2500.00 usec
PLM1 9.00000000 W
PLM10 2.25000000 W

----- GRADIENT CHANNEL ---
GPMAM[1] SMSQ10.100
GP21 40.00 %
P16 1000.00 usec

F1 - Acquisition parameters:
TD 256
SF01 600.1328 MHz
FIDRES 23.475060 Hz
SW 10.014 ppm
FhMODE States=HF1

F2 - Processing parameters:
SI 1024
SF 600.1300115 MHz
WDW EM
SSB 0
LB 0 Hz
GB 0
PC 1.00
  
```

6.774  
6.692  
6.689  
6.686  
6.642  
6.639  
6.545  
3.985  
3.930  
3.947  
3.520  
3.133  
3.118  
4.528  
4.523  
4.513  
4.508  
3.932  
3.924  
3.918  
3.916  
3.906  
3.900  
3.880  
3.828  
3.822  
3.810  
3.804  
3.786  
0.983  
0.971

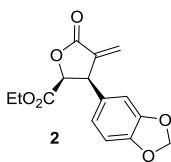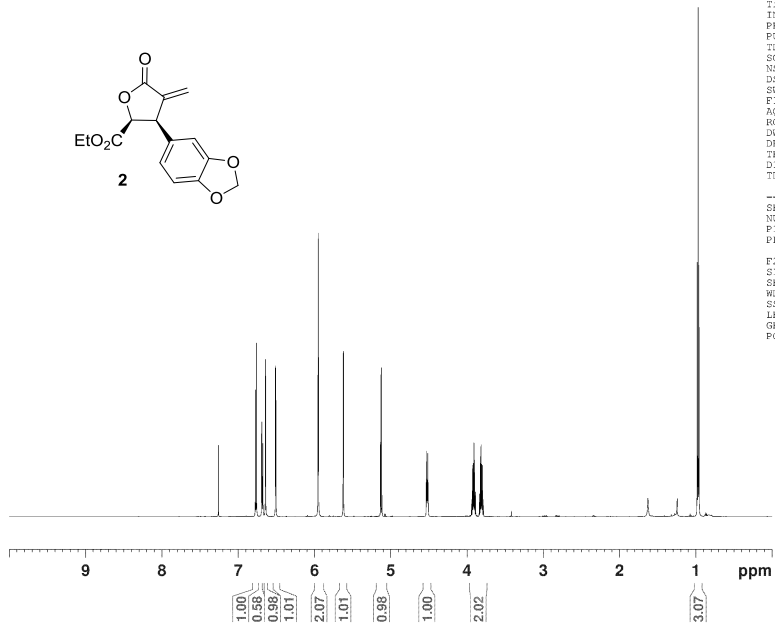

```

Current Data Parameters
NAME New folder
EXPNO 1
PROCNO 1

F2 - Acquisition Parameters
Date_ 20141125
Time 22.17
INSTRUM spect
PROBHD 5 mm CPQNP 1H/
PULPROG zg30
TD 65536
SOLVENT CDCl3
NS 16
DS 2
SWH 12019.230 Hz
FIDRES 0.183399 Hz
AQ 2.7262976 sec
RG 32
DW 41.600 usec
DE 10.00 usec
TE 298.0 K
D1 1.00000000 sec
TD0 1

----- CHANNEL f1 -----
SF01 600.1337060 MHz
NUC1 1H
P1 13.00 usec
PLW1 9.00000000 W

F2 - Processing parameters:
SI 65536
SF 600.1300150 MHz
WDW EM
SSB 0
LB 0.30 Hz
GB 0
PC 1.00
  
```

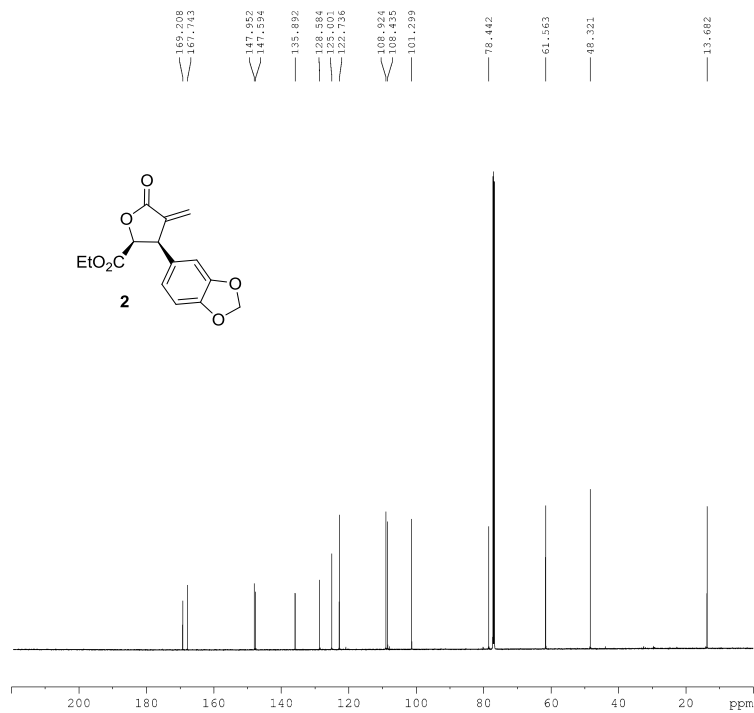

Current Data Parameters  
 NAME swk429ccol  
 EXPNO 2  
 PROCNO 1

F2 - Acquisition Parameters  
 Date\_ 20141125  
 Time 22.30  
 INSTRUM spect  
 PROBHD 5 mm CPQNP 1H/  
 PULPROG zgpg30  
 TD 65536  
 SOLVENT CDCl3  
 NS 256  
 DS 4  
 SMH 36057.691 Hz  
 FIDRES 0.550197 Hz  
 AQ 0.9087659 sec  
 RG 203  
 DM 13.867 usec  
 DE 18.00 usec  
 TE 298.0 K  
 D1 2.0000000 sec  
 D11 0.0300000 sec  
 TDO 1

----- CHANNEL f1 -----  
 SFO1 150.9178981 MHz  
 NUC1 13C  
 P1 11.93 usec  
 PLW1 30.0000000 W

----- CHANNEL f2 -----  
 SFO2 600.1324005 MHz  
 NUC2 1H  
 CPDPRG2 waltz16  
 PCPD2 80.00 usec  
 PLW2 9.0000000 W  
 PLW12 0.26587000 W  
 PLW13 0.17016000 W

F2 - Processing parameters  
 SI 32768  
 SF 150.9028162 MHz  
 MDW EM  
 SSB 0  
 LB 1.00 Hz  
 GB 0  
 PC 1.40

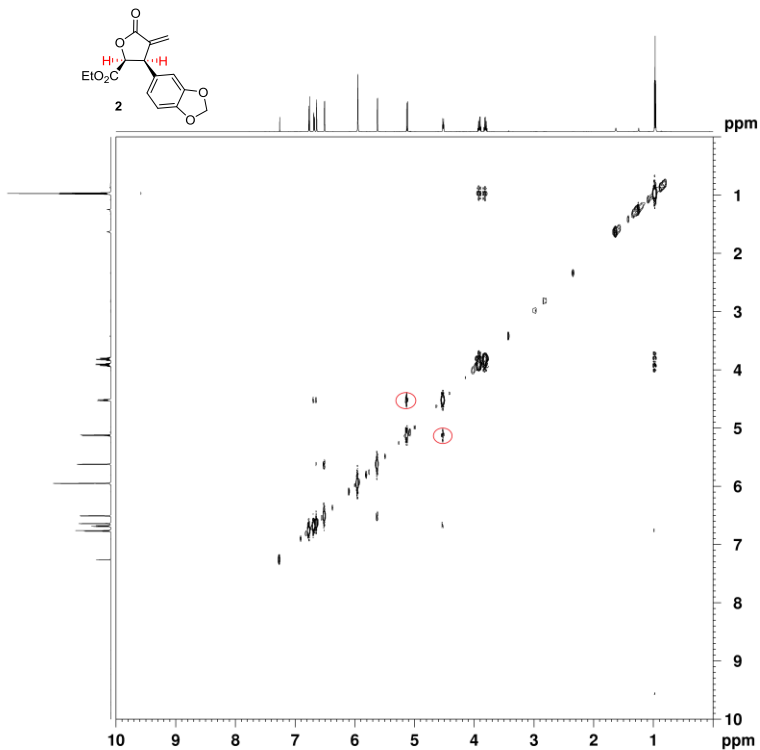

Current Data Parameters  
 NAME swk429ccol  
 EXPNO 3  
 PROCNO 1

F2 - Acquisition Parameters  
 Date\_ 20141125  
 Time 22.32  
 INSTRUM spect  
 PROBHD 5 mm CPQNP 1H/  
 PULPROG noesypphpgp  
 TD 2048  
 SOLVENT CDCl3  
 NS 4  
 DS 32  
 SMH 600.9132 Hz  
 FIDRES 2.934382 Hz  
 AQ 0.1703936 sec  
 RG 144  
 DM 83.200 usec  
 DE 10.00 usec  
 TE 298.0 K  
 D0 0.0000665 sec  
 D1 2.0000000 sec  
 D8 0.3000001 sec  
 D11 0.0300000 sec  
 D12 0.0002000 sec  
 D16 0.0002000 sec  
 LNO 0.0001640 sec

----- CHANNEL f1 -----  
 SFO1 600.1327625 MHz  
 NUC1 1H  
 P1 13.00 usec  
 P2 36.00 usec  
 P17 2500.00 usec  
 PLW1 9.0000000 W  
 PLW10 2.2500000 W

----- GRADIENT CHANNEL -----  
 GPNAM111 SMSCLD.100  
 GP1 40.00 %  
 P16 1000.00 usec

F1 - Acquisition parameters  
 TD 219  
 SFO1 600.1328 MHz  
 FIDRES 27.441166 Hz  
 SW 10.014 ppm  
 F0MODE States-TFPI

F2 - Processing parameters  
 SI 1324  
 SF 600.1300108 MHz  
 MDW QSINE  
 SSB 2  
 LB 0 Hz  
 GB 0  
 PC 1.00

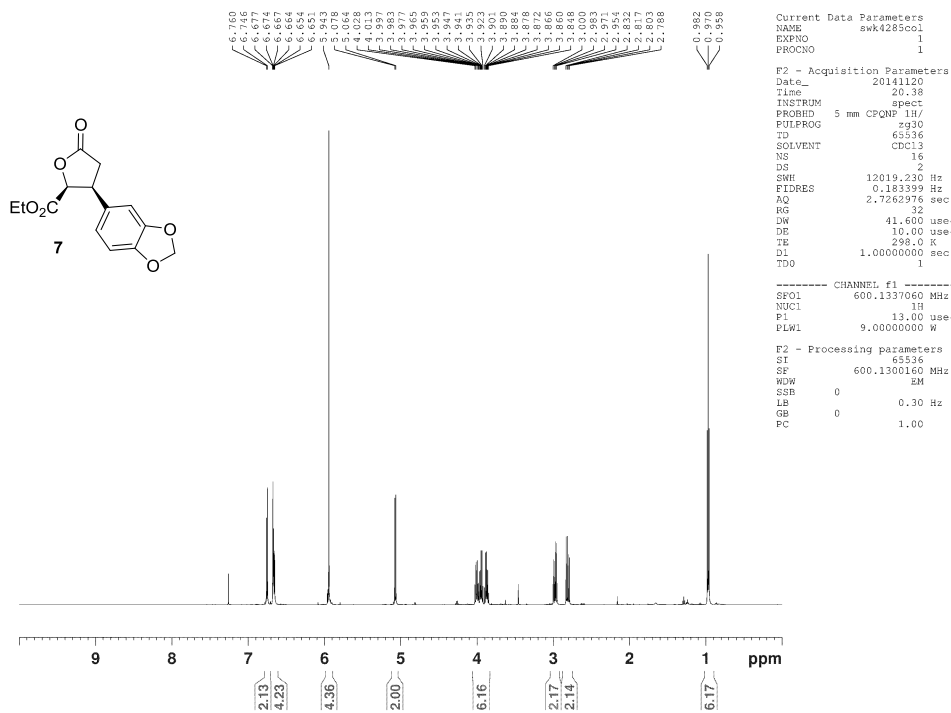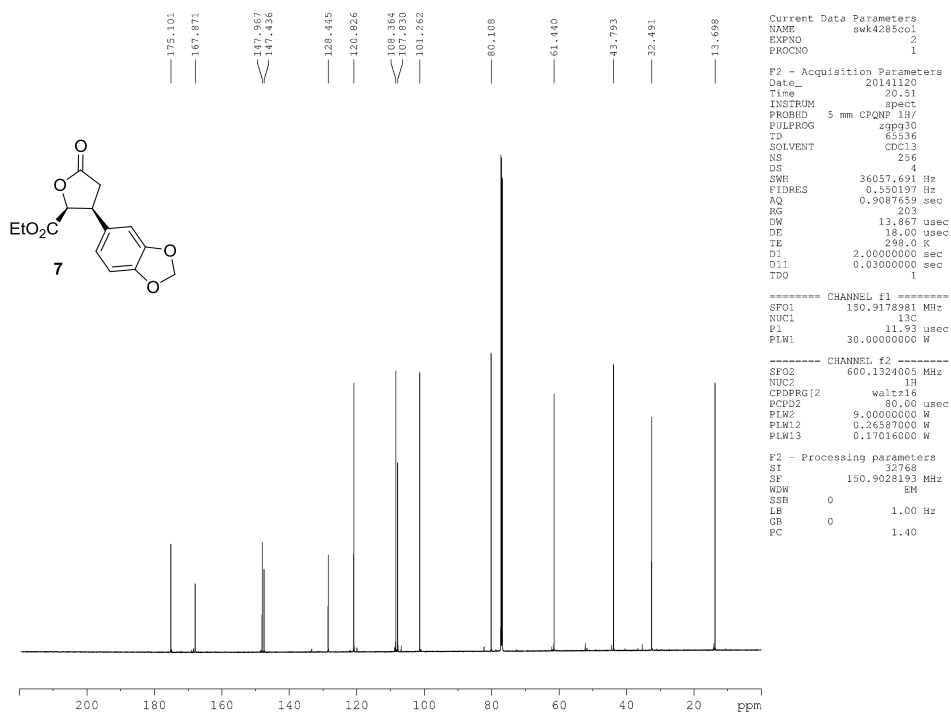

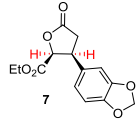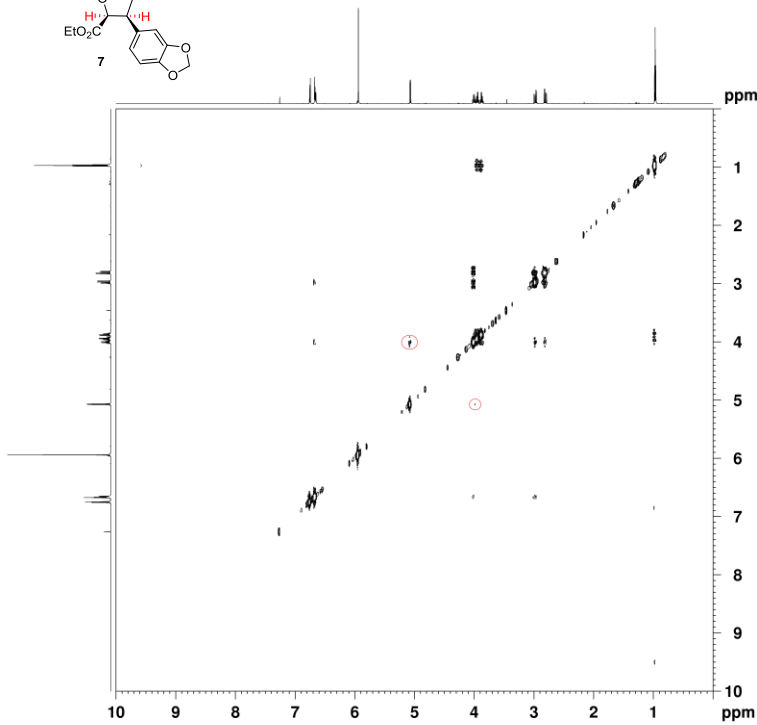

```

Current Data Parameters
Date_ 20141120
EXPNO 3
PROCNO 1

F2 - Acquisition Parameters
Date_ 20141120
Time 20:53
INSTRUM spect
PROBHD 5 mm CPQNP 1H/
PULPROG noesypphpgp
TD 2048
SOLVENT CDCl3
NS 4
DS 32
SWH 6009.619 Hz
FIDRES 2.934382 Hz
AQ 0.1703936 sec
RG 64
DW 83.200 usec
DE 10.00 usec
TE 298.0 K
D0 0.00006665 sec
D1 2.00000000 sec
DS 0.30000001 sec
D11 0.03000000 sec
D12 0.00002000 sec
D15 0.00020000 sec
INO 0.00016640 sec

----- CHANNEL f1 -----
SF01 600.1327625 MHz
NUC1 1H
P1 13.00 usec
P2 26.00 usec
P17 2500.00 usec
PLM1 9.00000000 W
PLM10 2.25000000 W

----- GRADIENT CHANNEL ---
GPMAM[1] SMSQ10.100
GP21 40.00 %
P16 1000.00 usec

F1 - Acquisition parameters:
TD 256
SF01 600.1328 MHz
FIDRES 23.475060 Hz
SW 10.014 ppm
FhMODE States=1891

F2 - Processing parameters
SI 1024
SF 600.1300110 MHz
WDW QSINE
SSB 2
LB 0 Hz
GB 0
PC 1.00

```

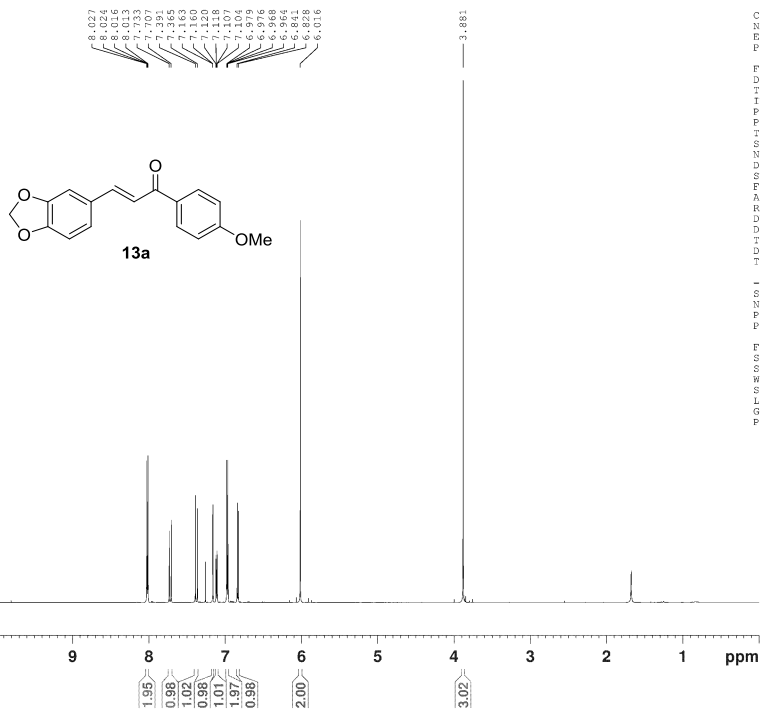

```

Current Data Parameters
NAME swk4288crudeH
EXPNO 1
PROCNO 1

F2 - Acquisition Parameters
Date_ 20140928
Time 9:00
INSTRUM spect
PROBHD 5 mm CPQCT 1H/
PULPROG zg30
TD 65536
SOLVENT CDCl3
NS 16
DS 2
SWH 12019.230 Hz
FIDRES 0.183399 Hz
AQ 2.7262976 sec
RG 12.7
DW 41.600 usec
DE 10.00 usec
TE 298.0 K
D1 1.00000000 sec
TD0 1

----- CHANNEL f1 -----
SF01 600.1337060 MHz
NUC1 1H
P1 10.35 usec
PLW1 13.00000000 W

F2 - Processing parameters
SI 65536
SF 600.1300151 MHz
WDW EM
SSB 0
LB 0.30 Hz
GB 0
PC 1.00

```





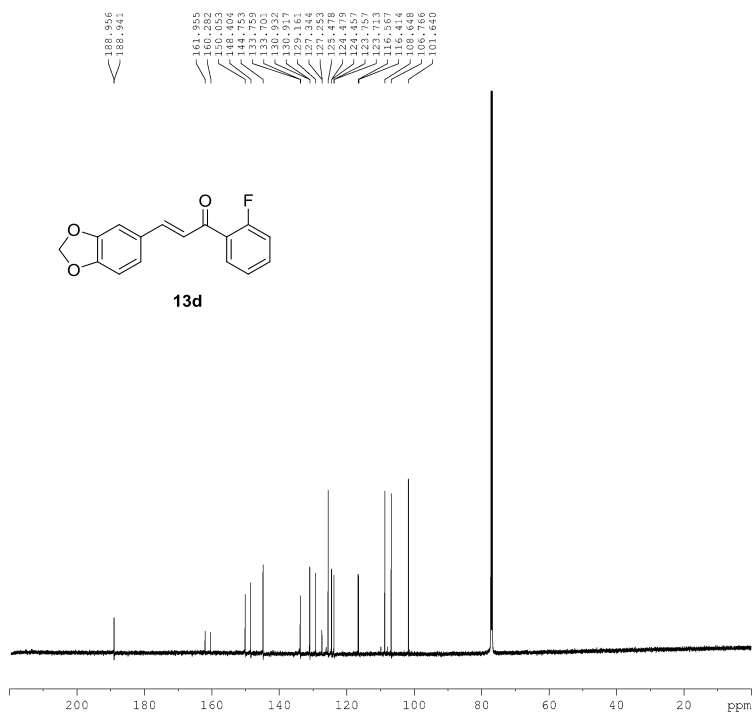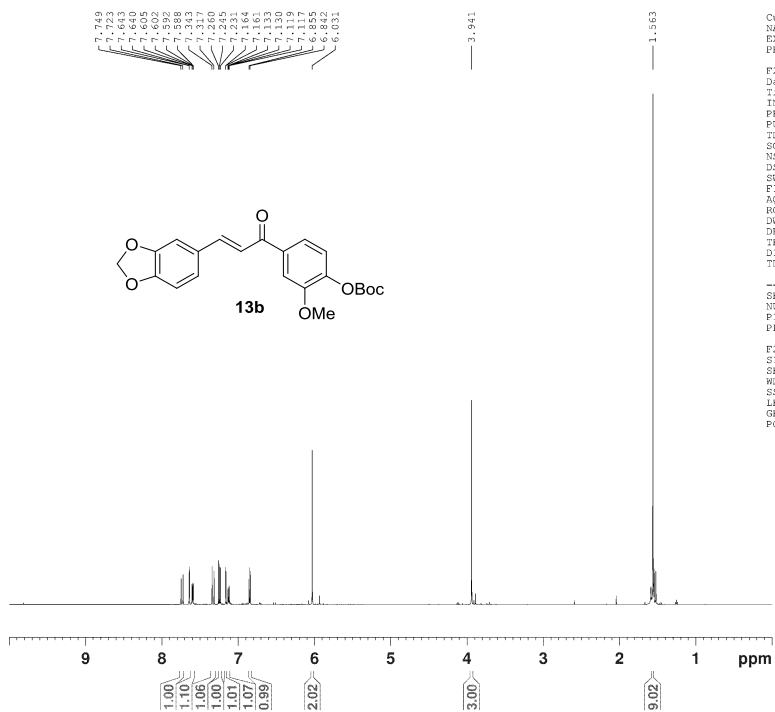

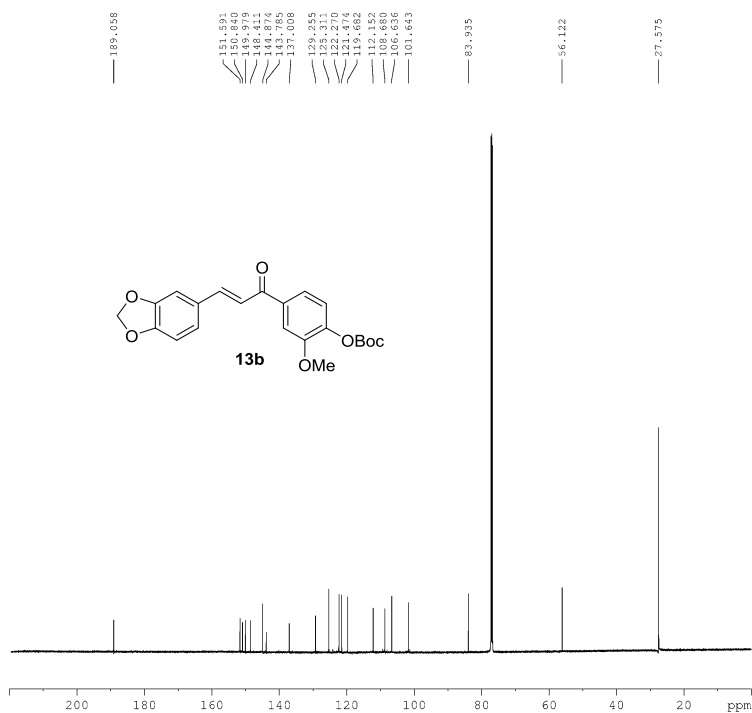

Current Data Parameters  
 NAME swk5143crude  
 EXPNO 3  
 PROCNO 1

F2 - Acquisition Parameters  
 Date\_ 20140710  
 Time 0.13  
 INSTRUM spect  
 PROBHD 5 mm CPQCI 1H/  
 PULPROG zgpg30  
 TD 65536  
 SOLVENT CDCl3  
 NS 512  
 DS 4  
 SMH 36057.691 Hz  
 FIDRES 0.550197 Hz  
 AQ 0.9087659 sec  
 RG 203  
 DW 13.867 usec  
 DE 18.00 usec  
 TE 298.2 K  
 D1 2.00000000 sec  
 D11 0.03000000 sec  
 TDO 1

----- CHANNEL f1 -----  
 SFO1 150.9178981 MHz  
 NUC1 13C  
 P1 11.35 usec  
 PLW1 230.0000000 W

----- CHANNEL f2 -----  
 SFO2 600.1324005 MHz  
 NUC2 1H  
 CPDPRG2 waltz16  
 PCPD2 90.00 usec  
 PLW2 13.00000000 W  
 PLW12 0.23498000 W  
 PLW13 0.19033000 W

F2 - Processing parameters  
 SI 32768  
 SF 150.9028140 MHz  
 WDW EM  
 SSB 0  
 LB 1.00 Hz  
 GB 0  
 PC 1.40

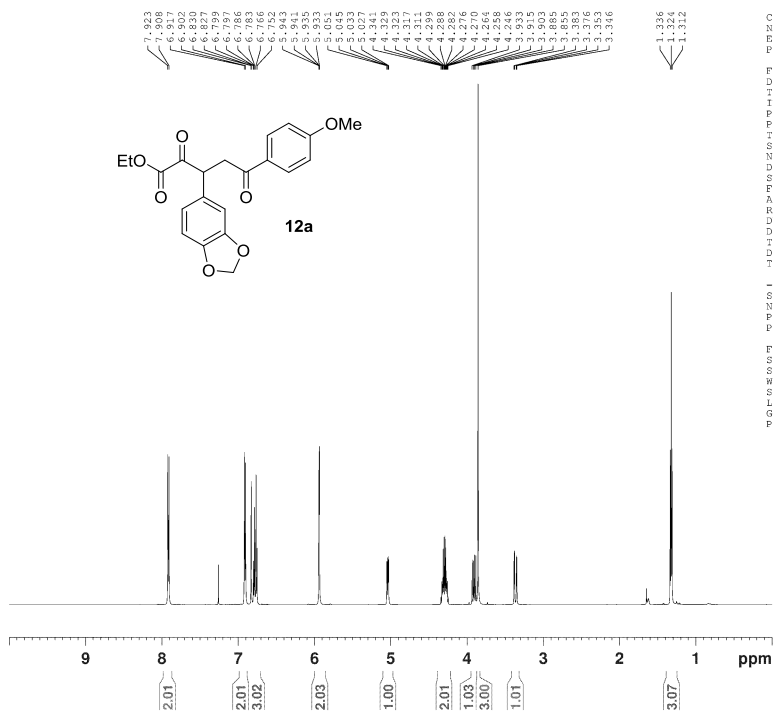

Current Data Parameters  
 NAME awk5081fr40-42  
 EXPNO 1  
 PROCNO 1

F2 - Acquisition Parameters  
 Date\_ 20141108  
 Time 8.29  
 INSTRUM spect  
 PROBHD 5 mm CPQNF 1H/  
 PULPROG zg30  
 TD 65536  
 SOLVENT CDCl3  
 NS 6  
 DS 0  
 SMH 12019.230 Hz  
 FIDRES 0.183399 Hz  
 AQ 2.7262976 sec  
 RG 32  
 DW 41.600 usec  
 DE 10.00 usec  
 TE 298.0 K  
 D1 1.00000000 sec  
 TDO 1

----- CHANNEL f1 -----  
 SFO1 600.1337060 MHz  
 NUC1 1H  
 P1 13.00 usec  
 PLW1 9.00000000 W

F2 - Processing parameters  
 SI 65536  
 SF 600.1300141 MHz  
 WDW EM  
 SSB 0  
 LB 0.30 Hz  
 GB 0  
 PC 1.00



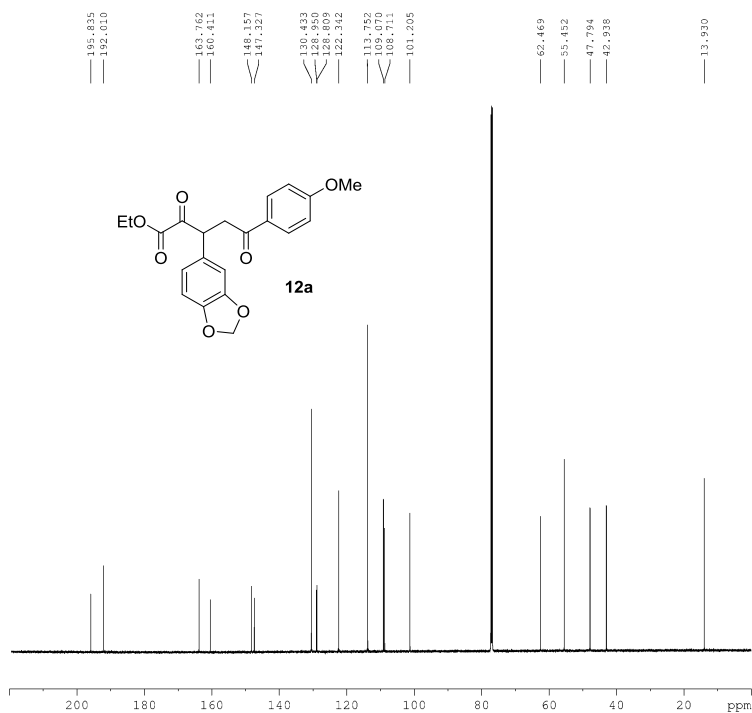

Current Data Parameters  
 NAME swk5081f40-42  
 EXPNO 2  
 PROCNO 1

F2 - Acquisition Parameters  
 Date\_ 20141108  
 Time 8.31  
 INSTRUM spect  
 PROBHD 5 mm CPQNP 1H/  
 PULPROG zgpg30  
 TD 65536  
 SOLVENT CDCl3  
 NS 36  
 DS 0  
 SWH 36057.691 Hz  
 FIDRES 0.550197 Hz  
 AQ 0.9087659 sec  
 RG 203  
 DW 13.867 usec  
 DE 18.00 usec  
 TE 298.0 K  
 D1 2.00000000 sec  
 D11 0.03000000 sec  
 TDO 1

----- CHANNEL f1 -----  
 SF01 150.9178981 MHz  
 NUC1 13C  
 P1 11.93 usec  
 PLW1 30.00000000 W

----- CHANNEL f2 -----  
 SF02 600.1324005 MHz  
 NUC2 1H  
 CPDPRG2 waltz16  
 PCPD2 80.00 usec  
 PLW2 9.00000000 W  
 PLW12 0.26587000 W  
 PLW13 0.17016000 W

F2 - Processing parameters  
 SI 32768  
 SF 150.9028173 MHz  
 WDW EM  
 SSB 0  
 LB 1.00 Hz  
 GB 0  
 PC 1.40

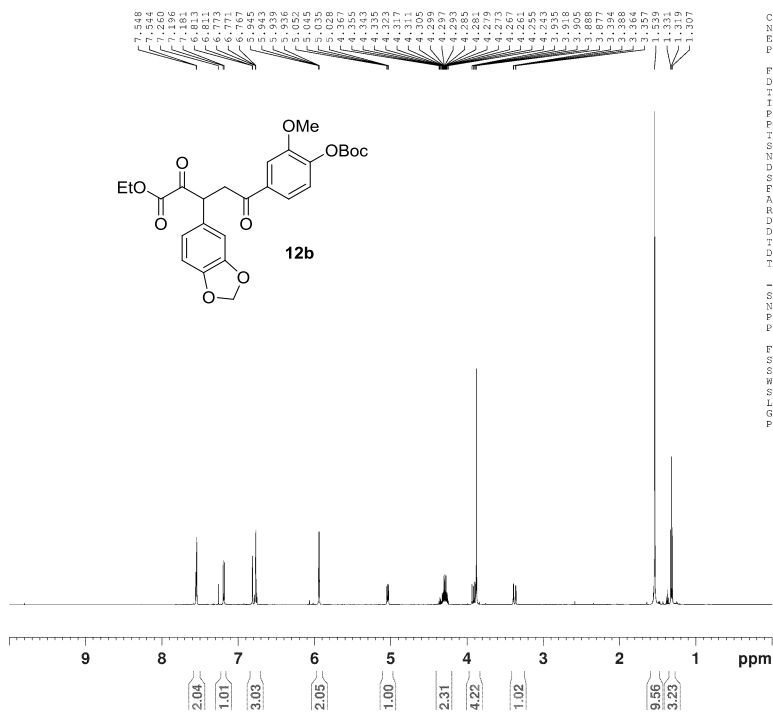

Current Data Parameters  
 NAME swk5193crude  
 EXPNO 1  
 PROCNO 1

F2 - Acquisition Parameters  
 Date\_ 20140925  
 Time 19.08  
 INSTRUM spect  
 PROBHD 5 mm CPOCT 1H/  
 PULPROG zg30  
 TD 65536  
 SOLVENT CDCl3  
 NS 16  
 DS 2  
 SWH 12019.230 Hz  
 FIDRES 0.183399 Hz  
 AQ 2.7262976 sec  
 RG 22.6  
 DW 41.600 usec  
 DE 10.00 usec  
 TE 298.0 K  
 D1 1.00000000 sec  
 TDO 1

----- CHANNEL f1 -----  
 SF01 600.1337060 MHz  
 NUC1 1H  
 P1 10.35 usec  
 PLW1 13.00000000 W

F2 - Processing parameters  
 SI 65536  
 SF 600.1300151 MHz  
 WDW EM  
 SSB 0  
 LB 0.30 Hz  
 GB 0  
 PC 1.00



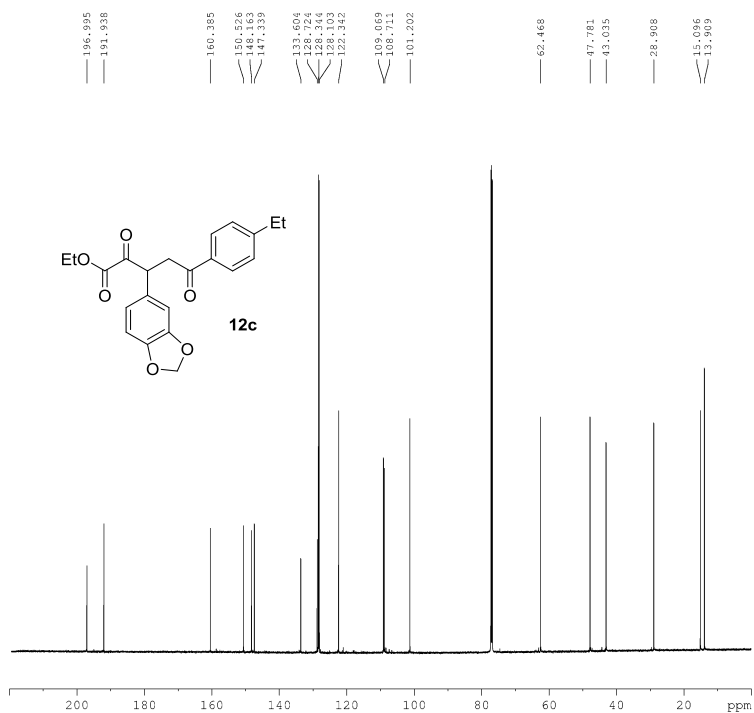

Current Data Parameters  
 NAME swk5107col  
 EXPNO 3  
 PROCNO 1

F2 - Acquisition Parameters  
 Date\_ 20140710  
 Time 2.46  
 INSTRUM spect  
 PROBHD 5 mm CPQCI 1H/  
 PULPROG zgpg30  
 TD 65536  
 SOLVENT CDCl3  
 NS 512  
 DS 4  
 SMH 36057.691 Hz  
 FIDRES 0.550197 Hz  
 AQ 0.9087659 sec  
 RG 203  
 DW 13.867 usec  
 DE 18.00 usec  
 TE 298.1 K  
 D1 2.00000000 sec  
 D11 0.03000000 sec  
 TDO 1

----- CHANNEL f1 -----  
 SF01 150.9178981 MHz  
 NUC1 13C  
 P1 11.35 usec  
 PLW1 230.00000000 W

----- CHANNEL f2 -----  
 SF02 600.1324005 MHz  
 NUC2 1H  
 CPDPRG2 waltz16  
 PCPD2 90.00 usec  
 PLW2 13.00000000 W  
 PLW12 0.23498000 W  
 PLW13 0.19033000 W

F2 - Processing parameters  
 SI 32768  
 SF 150.9028195 MHz  
 WDW EM  
 SSB 0  
 LB 1.00 Hz  
 GB 0  
 PC 1.40

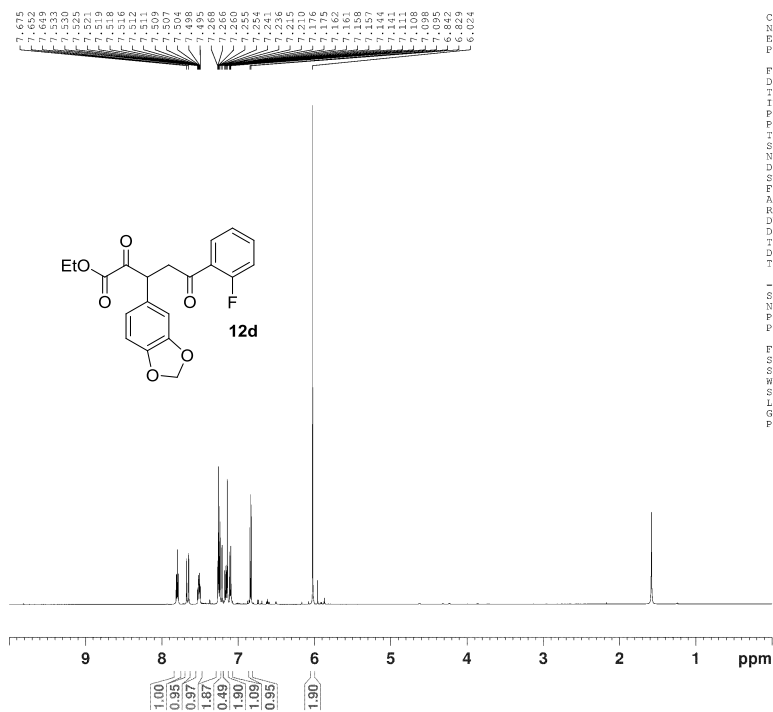

Current Data Parameters  
 NAME swk5149crude  
 EXPNO 1  
 PROCNO 1

F2 - Acquisition Parameters  
 Date\_ 20140709  
 Time 21.37  
 INSTRUM spect  
 PROBHD 5 mm CPQCI 1H/  
 PULPROG zg30  
 TD 65536  
 SOLVENT CDCl3  
 NS 16  
 DS 0  
 SMH 12019.230 Hz  
 FIDRES 0.183399 Hz  
 AQ 2.7262976 sec  
 RG 18  
 DW 41.600 usec  
 DE 10.00 usec  
 TE 298.1 K  
 D1 1.00000000 sec  
 TDO 1

----- CHANNEL f1 -----  
 SF01 600.1337060 MHz  
 NUC1 1H  
 P1 12.10 usec  
 PLW1 13.00000000 W

F2 - Processing parameters  
 SI 65536  
 SF 600.1300140 MHz  
 WDW EM  
 SSB 0  
 LB 0.30 Hz  
 GB 0  
 PC 1.00



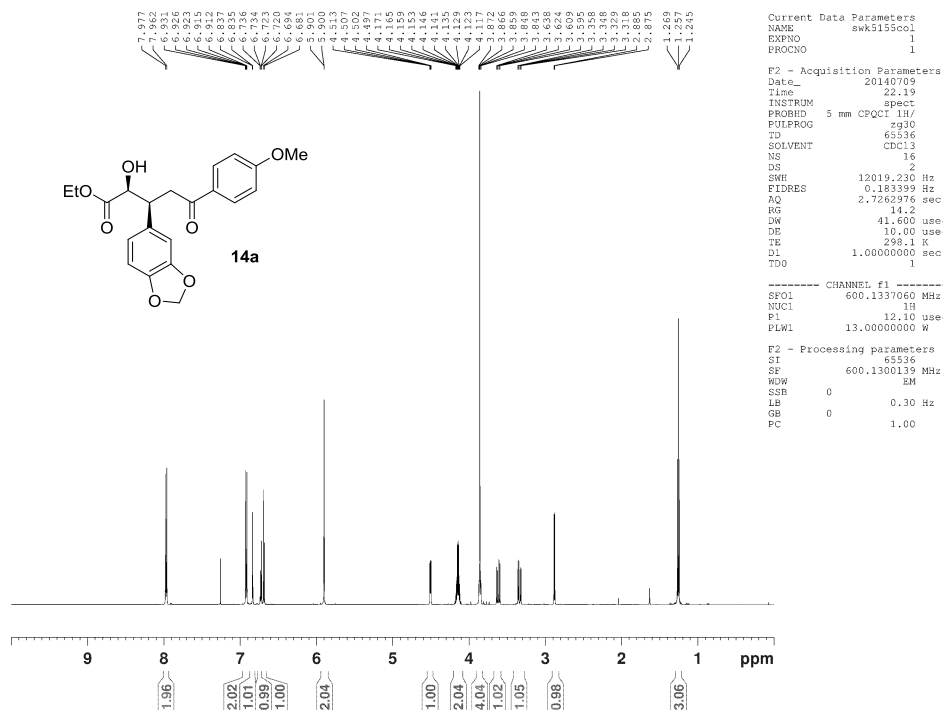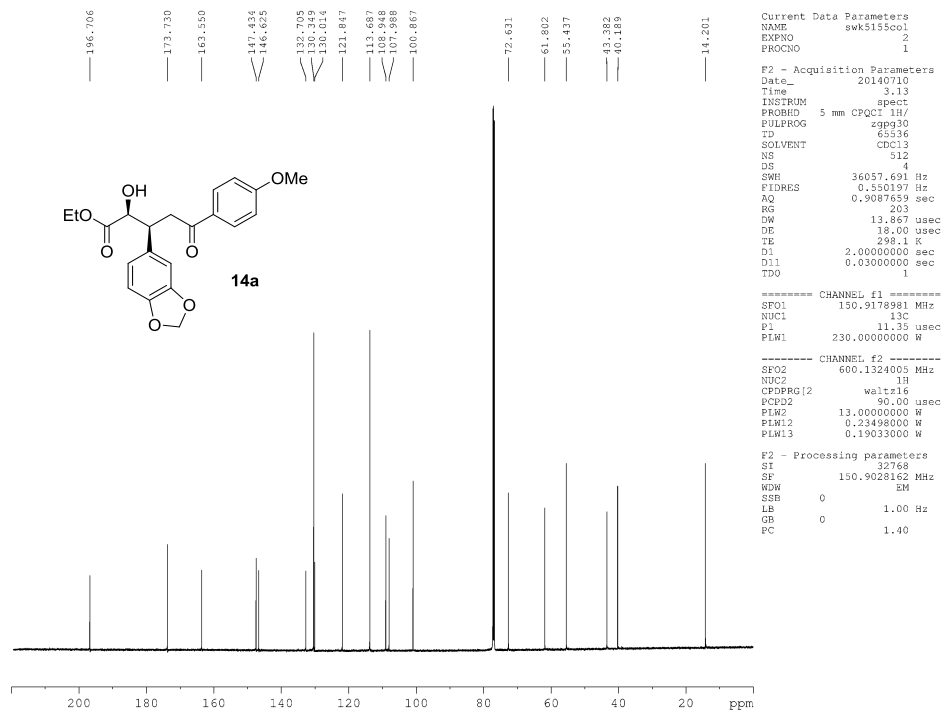

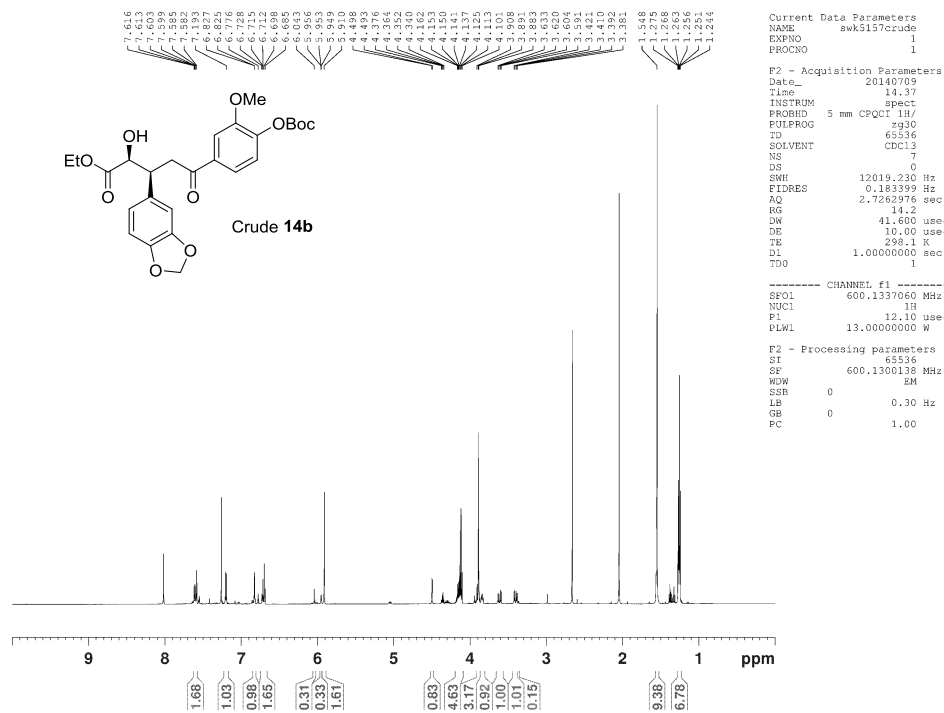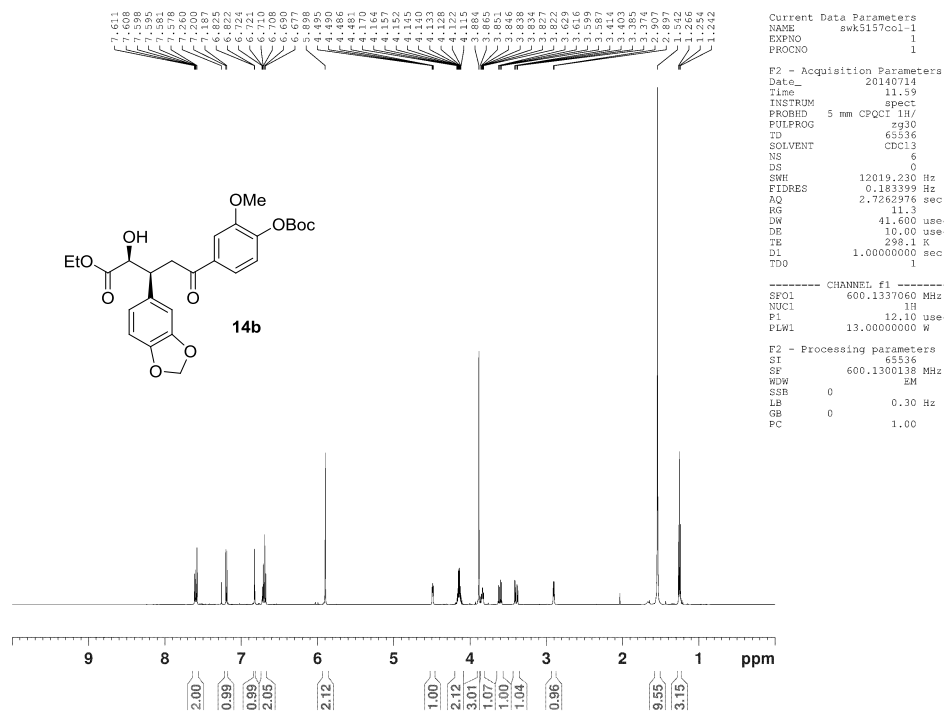









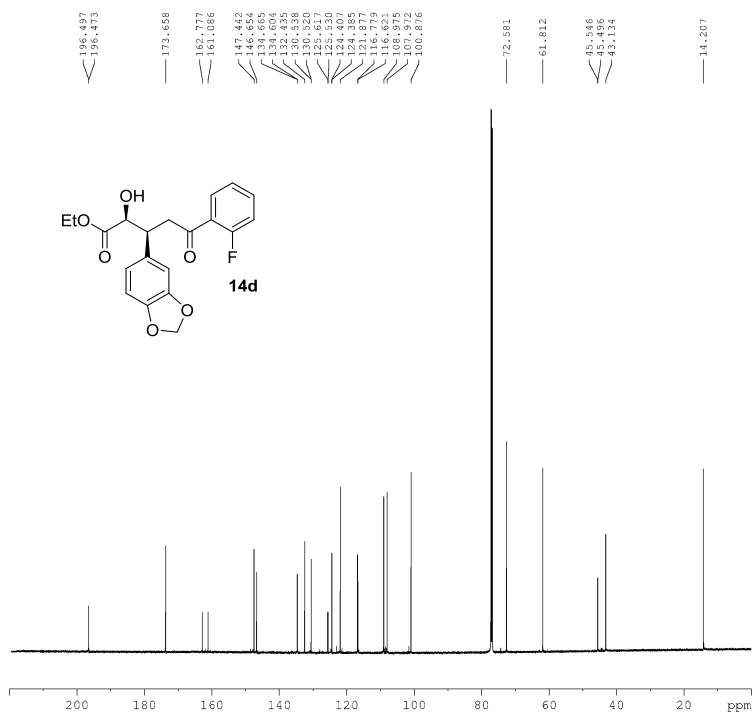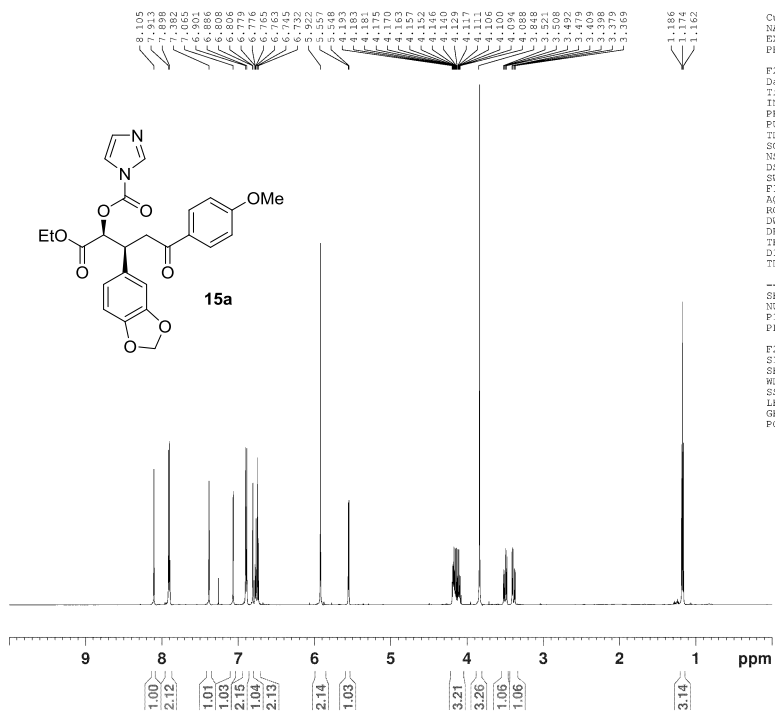

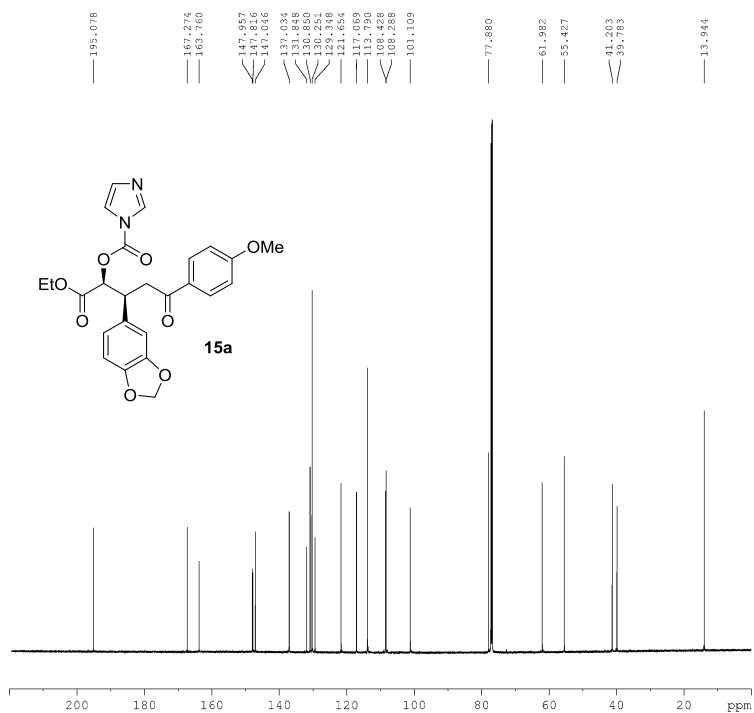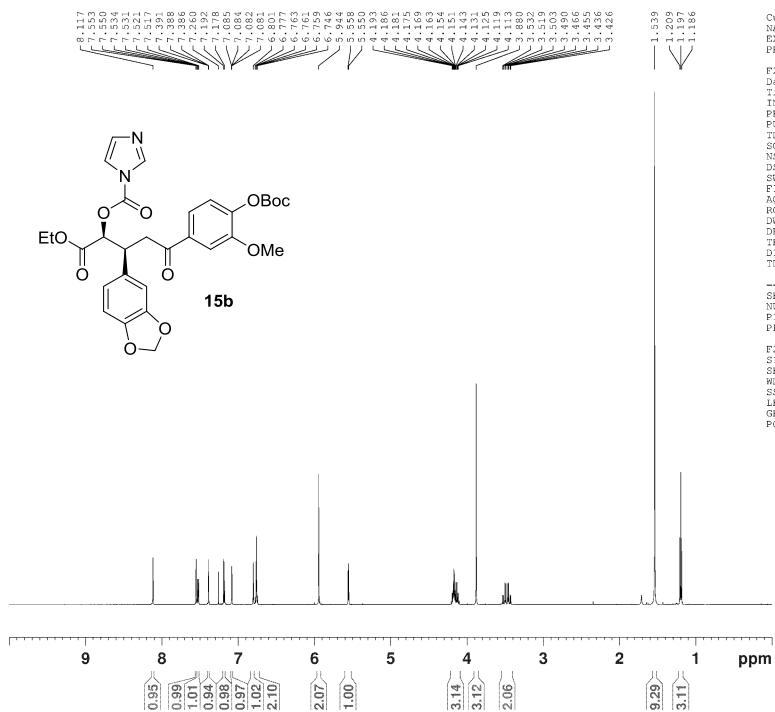

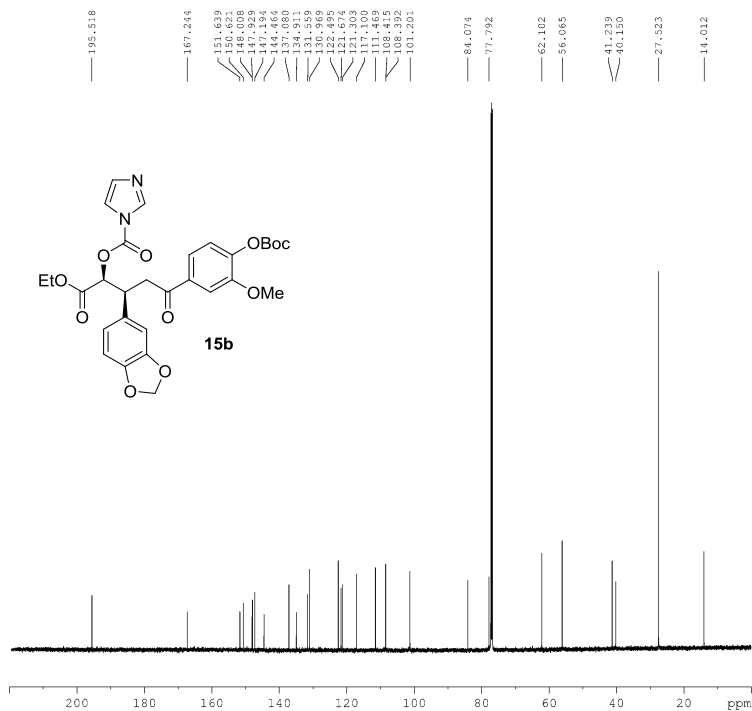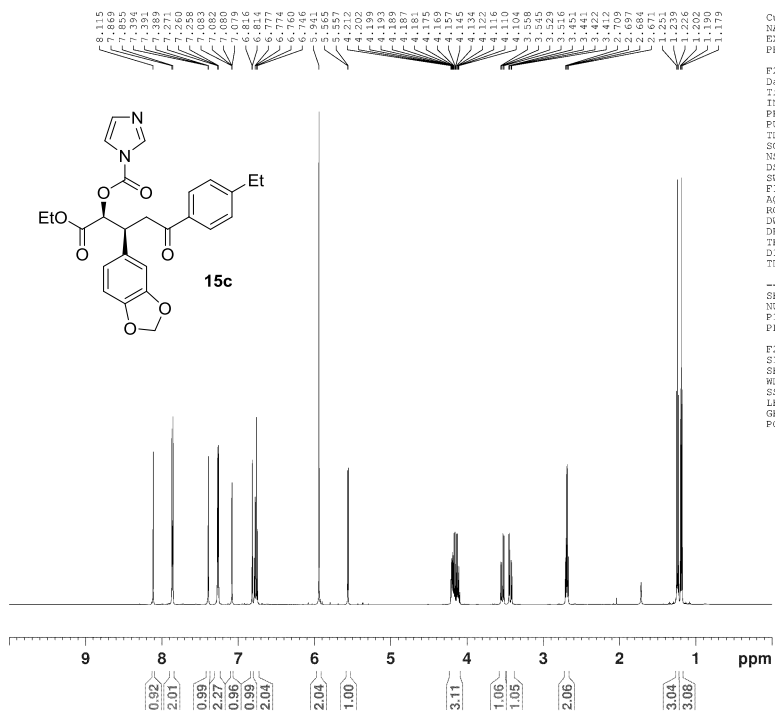

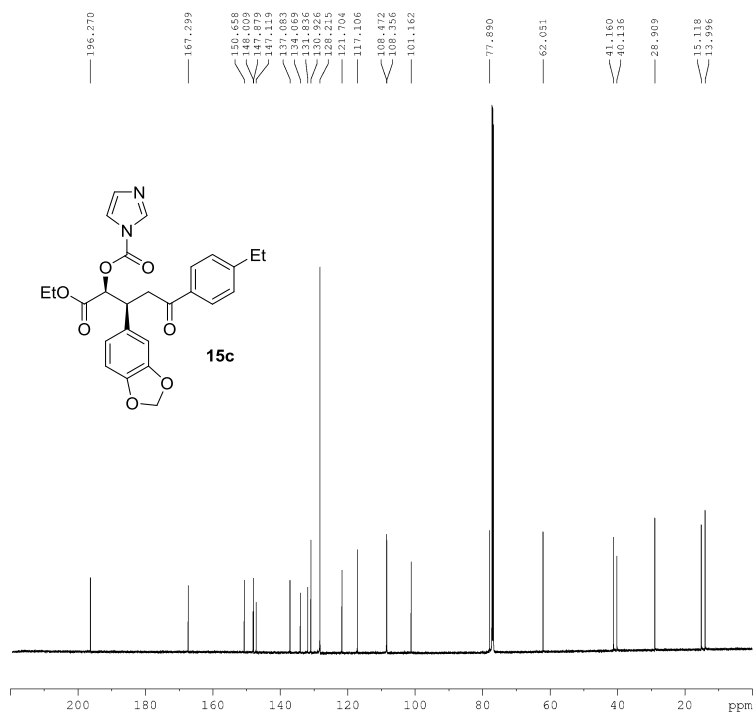

Current Data Parameters  
 NAME swk5147col  
 EXPNO 2  
 PROCNO 1

F2 - Acquisition Parameters  
 Date\_ 20140710  
 Time 0.40  
 INSTRUM spect  
 PROBHD 5 mm CPQCI 1H/  
 PULPROG zgpg30  
 TD 65536  
 SOLVENT CDCl3  
 NS 512  
 DS 4  
 SMH 36057.691 Hz  
 FIDRES 0.550197 Hz  
 AQ 0.9087659 sec  
 RG 203  
 DW 13.867 usec  
 DE 18.00 usec  
 TE 298.2 K  
 D1 2.00000000 sec  
 D11 0.03000000 sec  
 TDO 1

----- CHANNEL f1 -----  
 SFO1 150.9178981 MHz  
 NUC1 13C  
 P1 11.35 usec  
 PLW1 230.00000000 W

----- CHANNEL f2 -----  
 SFO2 600.1324005 MHz  
 NUC2 1H  
 CPDPRG2 waltz16  
 KCPD2 90.00 usec  
 PLW2 13.00000000 W  
 PLW12 0.23498000 W  
 PLW13 0.19033000 W

F2 - Processing parameters  
 SI 32768  
 SF 150.9028162 MHz  
 WDW EM  
 SSB 0  
 LB 1.00 Hz  
 GB 0  
 PC 1.40

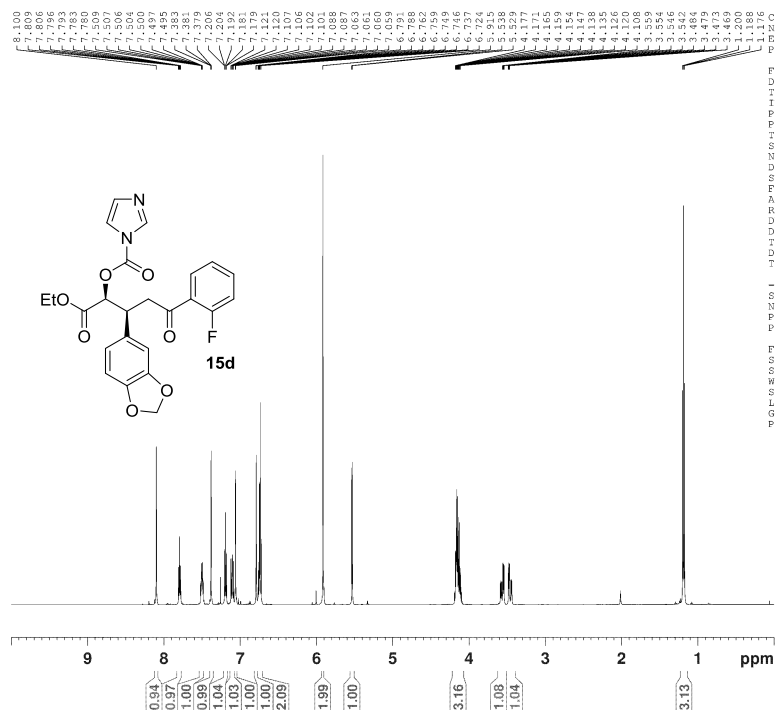

Current Data Parameters  
 NAME swk5161col-1  
 EXPNO 1  
 PROCNO 1

F2 - Acquisition Parameters  
 Date\_ 20140711  
 Time 11.13  
 INSTRUM spect  
 PROBHD 5 mm CPQCI 1H/  
 PULPROG zg30  
 TD 65536  
 SOLVENT CDCl3  
 NS 8  
 DS 2  
 SMH 12019.230 Hz  
 FIDRES 0.183399 Hz  
 AQ 2.7262976 sec  
 RG 9  
 DW 41.600 usec  
 DE 10.00 usec  
 TE 298.2 K  
 D1 1.00000000 sec  
 TDO 1

----- CHANNEL f1 -----  
 SFO1 600.1337060 MHz  
 NUC1 1H  
 P1 12.10 usec  
 PLW1 13.00000000 W

F2 - Processing parameters  
 SI 65536  
 SF 600.1300137 MHz  
 WDW EM  
 SSB 0  
 LB 0.30 Hz  
 GB 0  
 PC 1.00

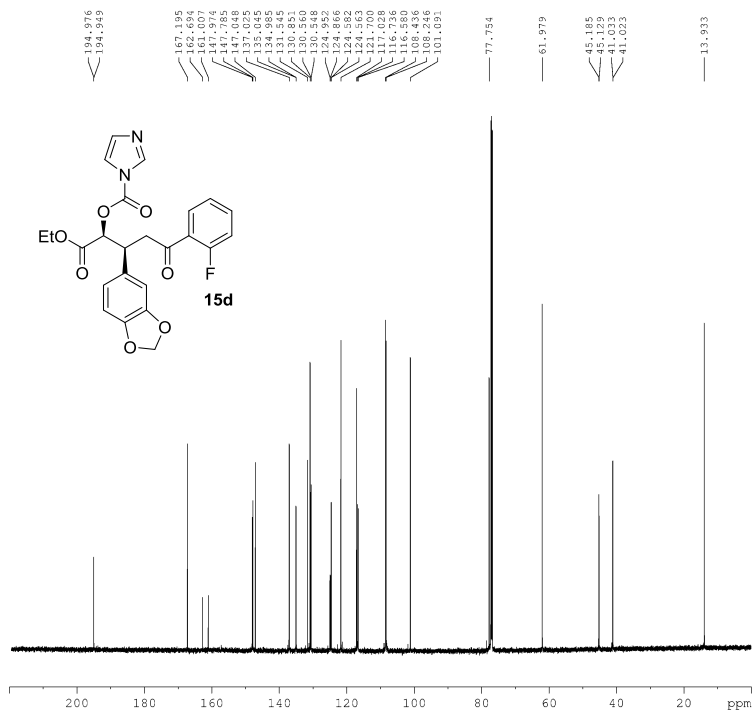

Current Data Parameters  
 NAME swk5161col-1  
 EXPNO 2  
 PROCNO 1

F2 - Acquisition Parameters  
 Date\_ 20140711  
 Time 11.17  
 INSTRUM spect  
 PROBHD 5 mm CPQCI 1H/  
 PULPROG zgpg30  
 TD 65536  
 SOLVENT CDCl3  
 NS 63  
 DS 4  
 SWH 36057.691 Hz  
 FIDRES 0.550197 Hz  
 AQ 0.9087659 sec  
 RG 203  
 DW 13.867 usec  
 DE 18.00 usec  
 TE 298.2 K  
 D1 2.00000000 sec  
 D11 0.03000000 sec  
 TDO 1

----- CHANNEL f1 -----  
 SFO1 150.9178981 MHz  
 NUC1 13C  
 P1 11.35 usec  
 PLW1 230.0000000 W

----- CHANNEL f2 -----  
 SFO2 600.1324005 MHz  
 NUC2 1H  
 CPDPRG2 waltz16  
 PCPD2 90.00 usec  
 PLW2 13.0000000 W  
 PLW12 0.23498000 W  
 PLW13 0.19033000 W

F2 - Processing parameters  
 SI 32768  
 SF 150.9028250 MHz  
 WDW EM  
 SSB 0  
 LB 1.00 Hz  
 GB 0  
 PC 1.40

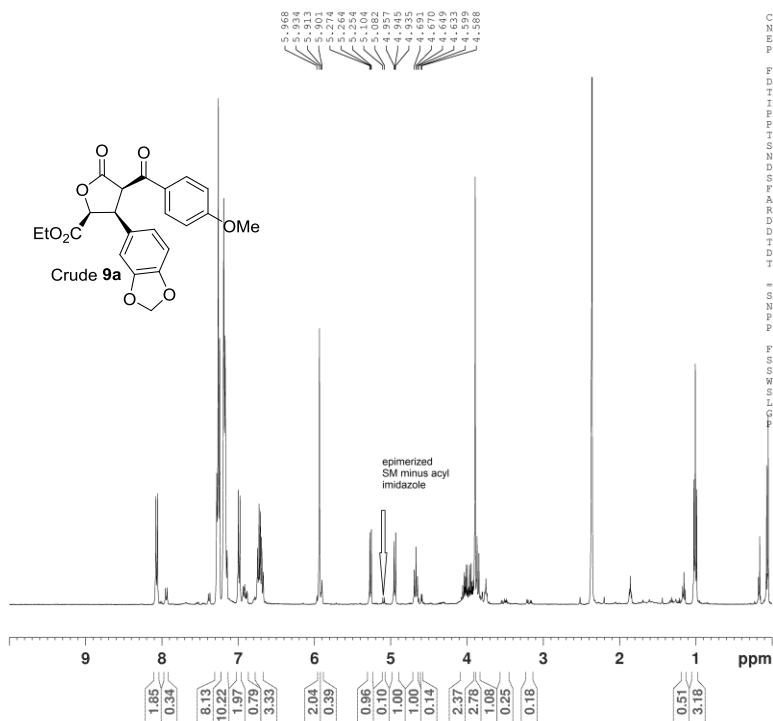

Current Data Parameters  
 NAME swk5064crude  
 EXPNO 1  
 PROCNO 1

F2 - Acquisition Parameters  
 Date\_ 20140515  
 Time 21.56  
 INSTRUM spect  
 PROBHD 5 mm PABBO BB-  
 PULPROG zg30  
 TD 65536  
 SOLVENT CDCl3  
 NS 9  
 DS 0  
 SWH 8012.820 Hz  
 FIDRES 0.122266 Hz  
 AQ 4.0894465 sec  
 RG 120.26  
 DW 62.400 usec  
 DE 6.50 usec  
 TE 295.5 K  
 D1 1.00000000 sec  
 TDO 1

----- CHANNEL f1 -----  
 SFO1 399.9824700 MHz  
 NUC1 1H  
 P1 12.38 usec  
 PLW1 11.19999981 W

F2 - Processing parameters  
 SI 65536  
 SF 399.9800098 MHz  
 WDW EM  
 SSB 0  
 LB 0.30 Hz  
 GB 0  
 PC 1.00



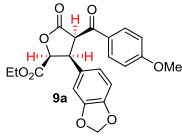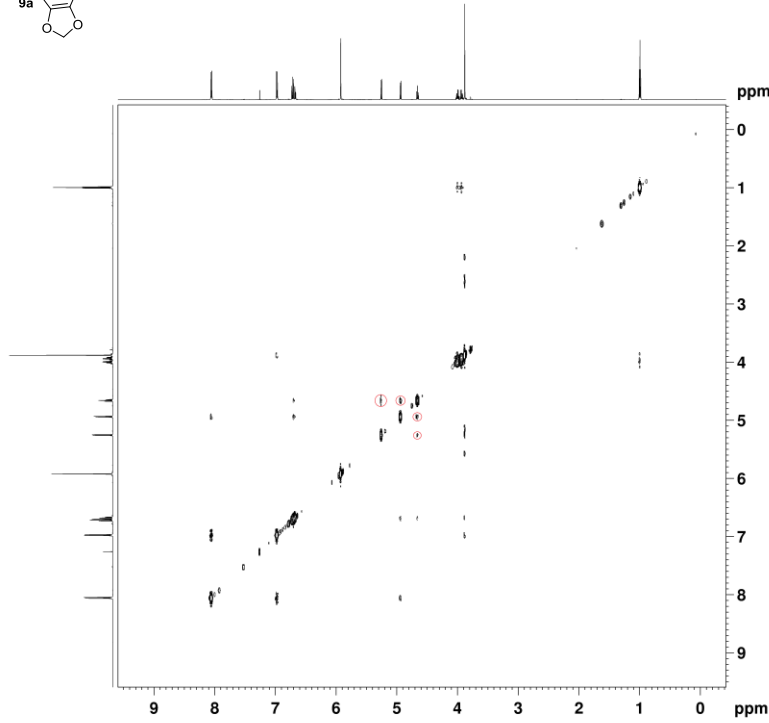

```

Current Data Parameters
NAME      swk5064fr27-48
EXPNO     3
PROCNO    1

F2 - Acquisition Parameters
Date_     20140710
Time      1.37
INSTRUM   spect
PROBHD    5 mm CQCI 1H/
PULPROG   noesygpppp
TD         2048
SOLVENT   CDCl3
NS         4
DS         32
SWH        6009.615 Hz
FIDRES     2.934382 Hz
AQ         0.1703936 sec
RG         64
DW         83.200 use
DE         10.00 use
TE         298.2 K
D0         0.00006779 sec
D1         2.00000000 sec
D8         0.30000001 sec
D11        0.03000000 sec
D12        0.00002000 sec
D16        0.00002000 sec
INO        0.00016640 sec

----- CHANNEL f1 -----
SFO1      600.1327625 MHz
NUC1      1H
P1        12.10 use
P2        24.20 use
P17       2500.00 use
PLW1      13.00000000 W
PLW10     2.81559992 W

----- GRADIENT CHANNEL ---
GPNAM[1]  SMSQ10.100
GPE1      40.00 %
P16       1000.00 use

F1 - Acquisition parameters
TD         256
SFO1      600.1328 MHz
FIDRES     23.475060 Hz
SW         10.014 ppm
FHM0DE    States=1F1

F2 - Processing parameters
SI         1024
SF         600.1300108 MHz
WDW        QSINE
SSB        2
LB         0 Hz
GB         0
PC         1.00
  
```

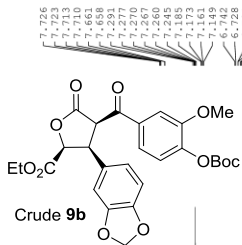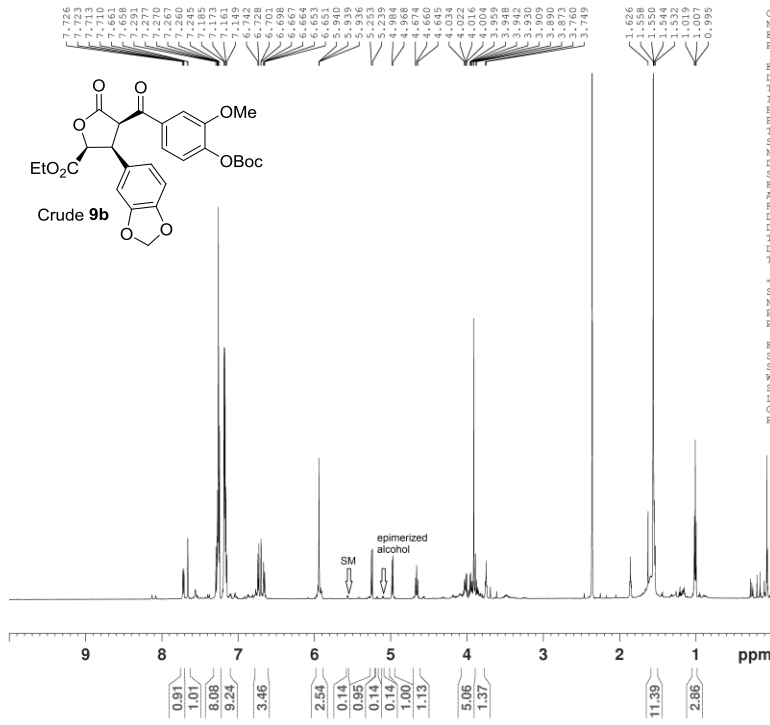

```

Current Data Parameters
NAME      swk5206crude
EXPNO     1
PROCNO    1

F2 - Acquisition Parameters
Date_     20140827
Time      15.16
INSTRUM   spect
PROBHD    5 mm CQCI 1H/
PULPROG   zg30
TD         65536
SOLVENT   CDCl3
NS         6
DS         0
SWH        12019.230 Hz
FIDRES     0.183399 Hz
AQ         2.7262976 sec
RG         18
DW         41.600 use
DE         10.00 use
TE         298.2 K
D1         1.00000000 sec
TDO        1

----- CHANNEL f1 -----
SFO1      600.1337060 MHz
NUC1      1H
P1        10.35 use
PLW1      13.00000000 W

F2 - Processing parameters
SI         65536
SF         600.1300136 MHz
WDW        EM
SSB        0
LB         0.30 Hz
GB         0
PC         1.00
  
```



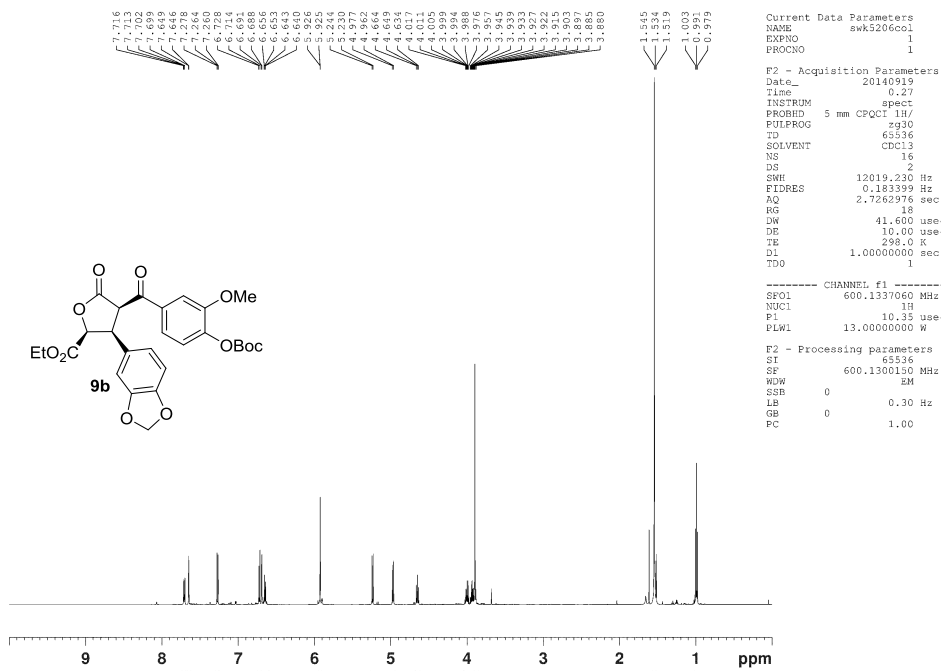

Current Data Parameters  
 NAME swk5206c01  
 EXPNO 1  
 PROCNO 1

F2 - Acquisition Parameters  
 Date\_ 20140919  
 Time 0.27  
 INSTRUM spect  
 PROBHD 5 mm CPQCI 1H/  
 PULPROG zg30  
 TD 65536  
 SOLVENT CDCl3  
 NS 16  
 DS 2  
 SMH 12019.230 Hz  
 FIDRES 0.183399 Hz  
 AQ 2.7262976 sec  
 RG 18  
 DW 41.600 usec  
 DE 10.00 usec  
 TE 298.0 K  
 D1 1.00000000 sec  
 TDO 1

----- CHANNEL f1 -----  
 SF01 600.137060 MHz  
 NUC1 1H  
 P1 10.35 usec  
 PLW1 13.00000000 W

F2 - Processing parameters  
 SI 55536  
 SF 600.1300150 MHz  
 WDW EM  
 SSB 0  
 LB 0.30 Hz  
 GB 0  
 FC 1.00

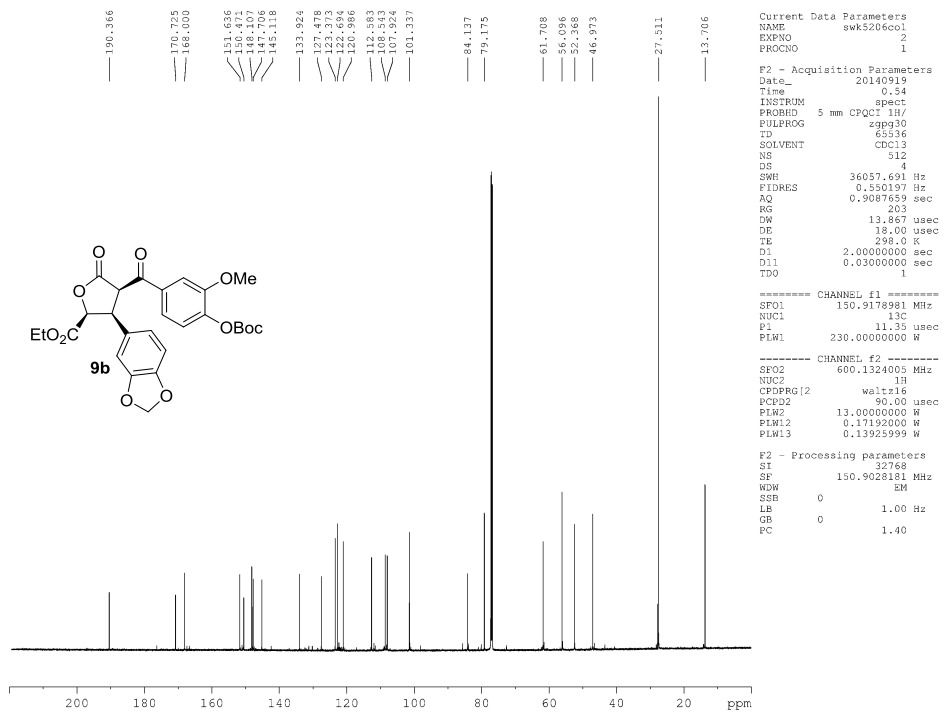

Current Data Parameters  
 NAME swk5206c01  
 EXPNO 2  
 PROCNO 1

F2 - Acquisition Parameters  
 Date\_ 20140919  
 Time 0.54  
 INSTRUM spect  
 PROBHD 5 mm CPQCI 1H/  
 PULPROG zgpg30  
 TD 65536  
 SOLVENT CDCl3  
 NS 512  
 DS 4  
 SMH 36057.691 Hz  
 FIDRES 0.550197 Hz  
 AQ 0.9087659 sec  
 RG 203  
 DW 13.867 usec  
 DE 18.00 usec  
 TE 298.0 K  
 D1 2.00000000 sec  
 D11 0.03000000 sec  
 TDO 1

----- CHANNEL f1 -----  
 SF01 150.9178981 MHz  
 NUC1 13C  
 P1 11.35 usec  
 PLW1 230.00000000 W

----- CHANNEL f2 -----  
 SF02 600.1324005 MHz  
 NUC2 1H  
 CPDPRG12 waltz16  
 PCPD2 90.00 usec  
 PLW2 13.00000000 W  
 PLW12 0.17192000 W  
 PLW13 0.13925999 W

F2 - Processing parameters  
 SI 32768  
 SF 150.9028181 MHz  
 WDW EM  
 SSB 0  
 LB 1.00 Hz  
 GB 0  
 FC 1.40

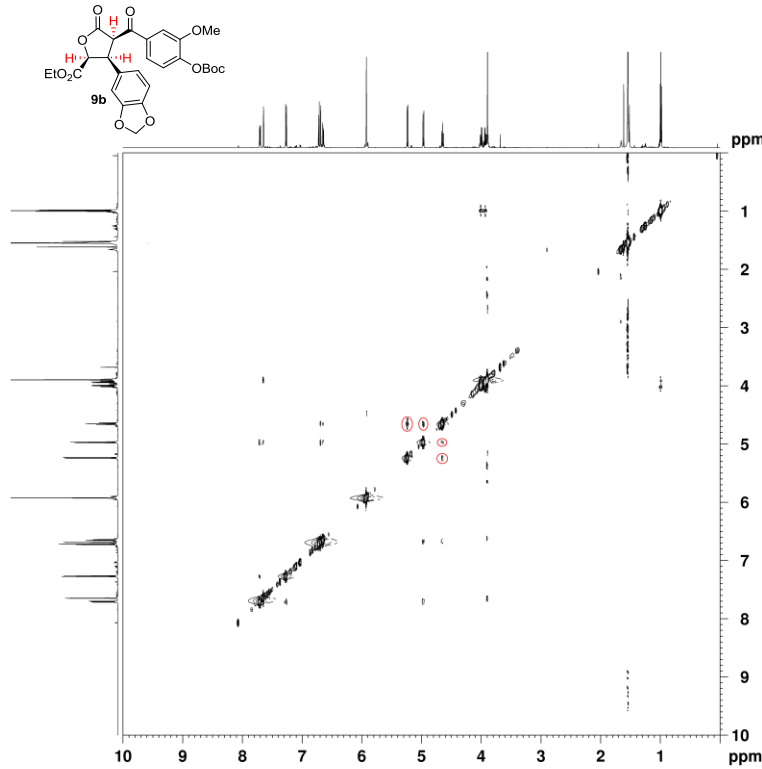

```

Current Data Parameters
NAME      swk5206col
EXPNO    3
PROCNO   1

F2 - Acquisition Parameters
Date_    20140919
Time     0.55
INSTRUM  spect
PROBHD   5 mm CPQCI 1H/
PULPROG  noesypphpp
TD        2048
SOLVENT  CDCl3
NS        4
DS        32
SWH       6009.619 Hz
FIDRES    2.934382 Hz
AQ        0.1703936 sec
RG         64
DW        83.200 usec
DE        10.00 usec
TE        298.0 K
D0        0.00007002 sec
D1        2.00000000 sec
D8        0.30000001 sec
D11       0.03000000 sec
D12       0.00002000 sec
D16       0.00020000 sec
INO       0.00016640 sec

----- CHANNEL f1 -----
SF01     600.1327625 MHz
NUC1     1H
P1       10.35 usec
P2       20.70 usec
P17      2500.00 usec
PLM1     13.00000000 W
PLW10    2.05999994 W

----- GRADIENT CHANNEL ---
GPMAM[1] SMSQ10.100
GP21     40.00 %
F16      1000.00 usec

F1 - Acquisition parameters:
TD        256
SF01     600.1328 MHz
FIDRES    23.475060 Hz
SW        10.014 ppm
FhMODE    States-TPPI

F2 - Processing parameters:
SI        1024
SF        600.1300131 MHz
WDW       QSINE
SSB       2
LB        0 Hz
GB        0
PC        1.00
  
```

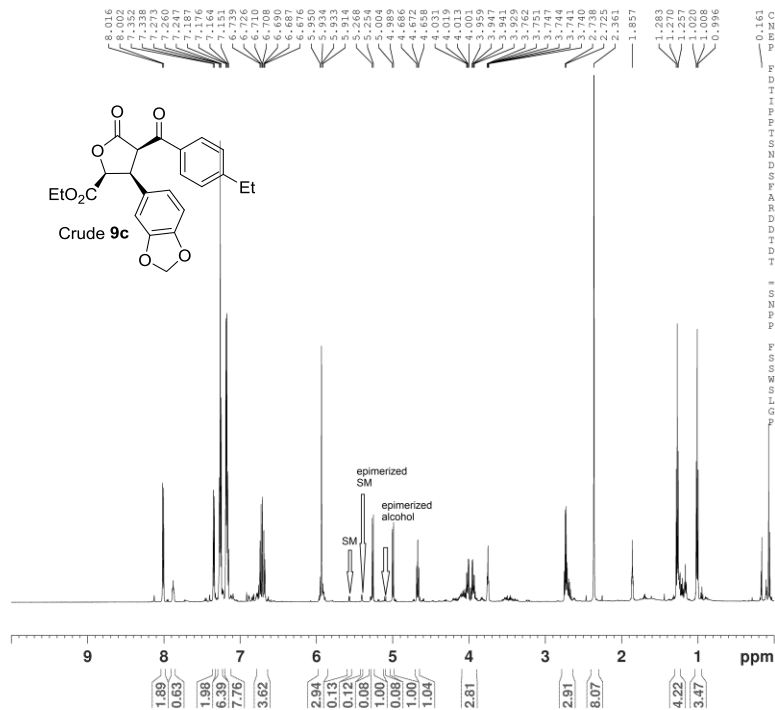

```

Current Data Parameters
NAME      swk5160crude
EXPNO    1
PROCNO   1

F2 - Acquisition Parameters
Date_    20140709
Time     14.33
INSTRUM  spect
PROBHD   5 mm CPQCI 1H/
PULPROG  zg30
TD        65536
SOLVENT  CDCl3
NS        6
DS        0
SWH       12019.230 Hz
FIDRES    0.183399 Hz
AQ        2.7262976 sec
RG         14.2
DW        41.600 usec
DE        10.00 usec
TE        298.2 K
D1        1.00000000 sec
TDO       1

----- CHANNEL f1 -----
SF01     600.1337060 MHz
NUC1     1H
P1       12.10 usec
PLW1     13.00000000 W

F2 - Processing parameters:
SI        65536
SF        600.1300131 MHz
WDW       EM
SSB       0
LB        0.30 Hz
GB        0
PC        1.00
  
```

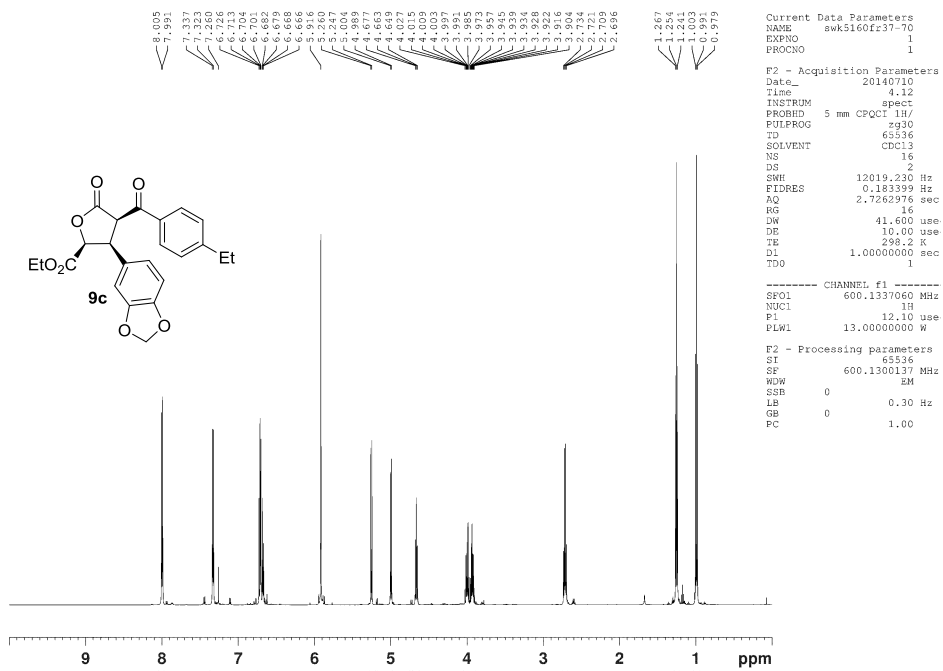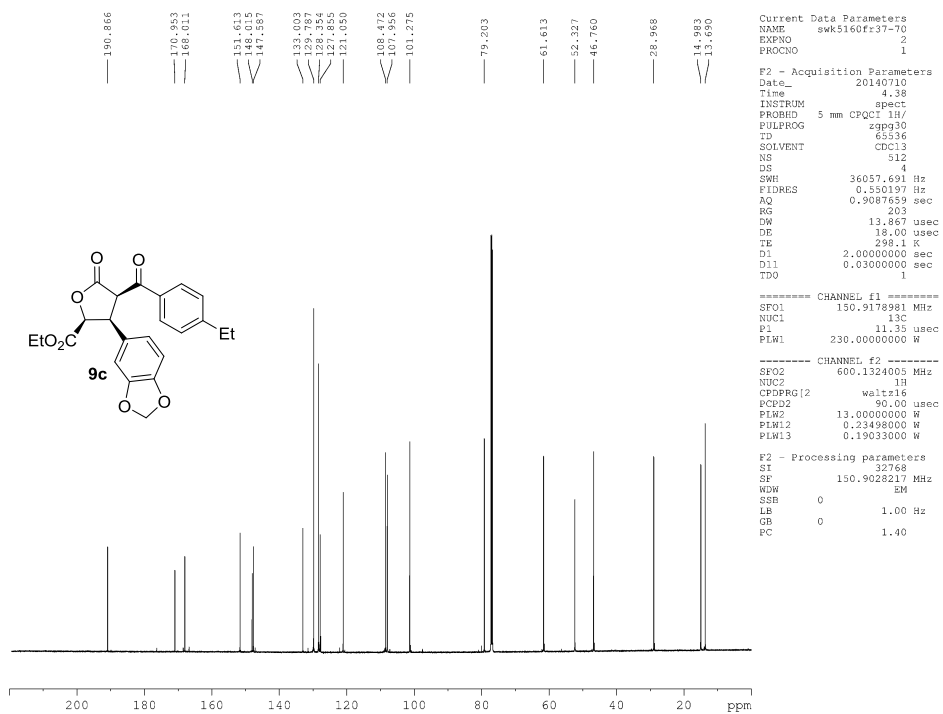

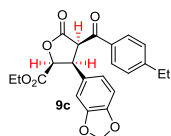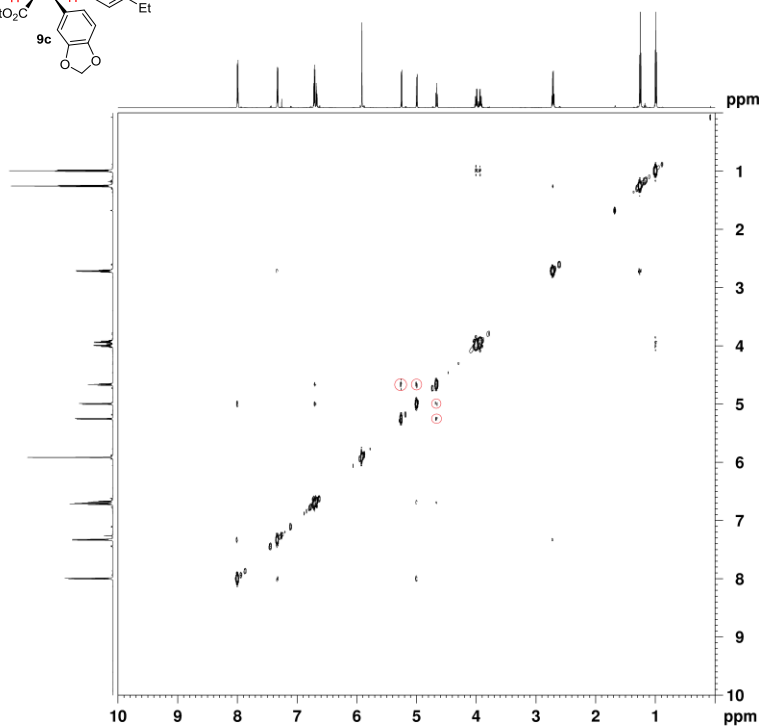

```

Current Data Parameters
NAME      swk5160fr37-70
EXPNO     3
PROCNO    1

F2 - Acquisition Parameters
Date_     20140710
Time      4.40
INSTRUM   spect
PROBHD    5 mm CPQCI 1H/
PULPROG   noesypphpgp
TD         2048
SOLVENT   CDCl3
NS         4
DS         32
SWH        6009.619 Hz
FIDRES     2.934382 Hz
AQ         0.1703936 sec
RG         36
DW         83.200 usec
DE         10.00 usec
TE         298.1 K
D0         0.00006779 sec
D1         2.00000000 sec
D8         0.30000001 sec
D11        0.03000000 sec
D12        0.00002000 sec
D16        0.00020000 sec
INO        0.00016640 sec

----- CHANNEL f1 -----
SF01      600.1327625 MHz
NUC1      1H
P1         12.10 usec
P2         24.20 usec
P17        2500.00 usec
PLM1      13.00000000 W
PLW10     2.81559992 W

----- GRADIENT CHANNEL ---
GPMAM[1]  SMSQ10.100
GP21      40.00 %
P16       1000.00 usec

F1 - Acquisition parameters:
TD         256
SF01      600.1328 MHz
FIDRES     23.475060 Hz
SW         10.014 ppm
FhMODE     States-TPP4

F2 - Processing parameters
SI         1024
SF         600.1300107 MHz
WDW        QSINE
SSB        2
LB         0 Hz
GB         0
PC         1.00
  
```

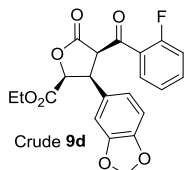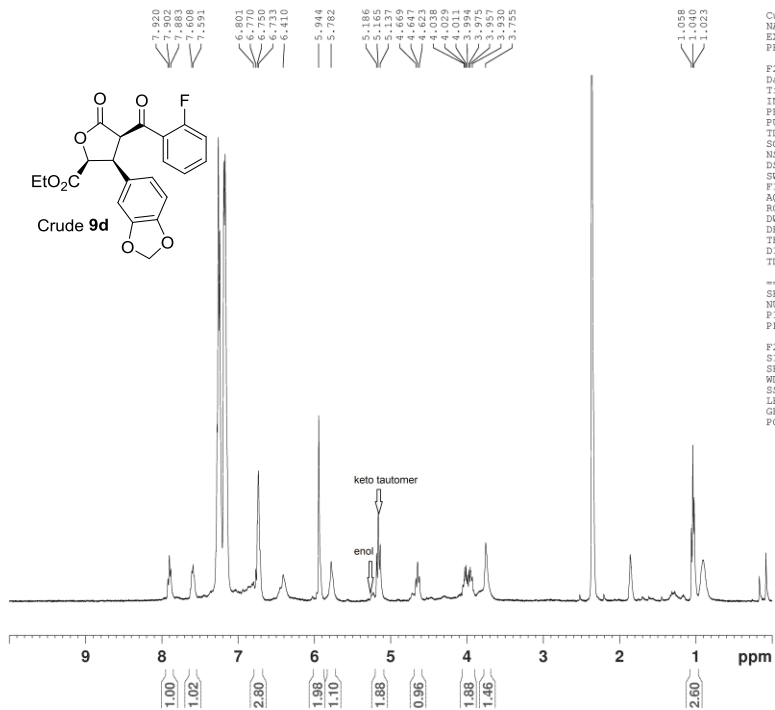

```

Current Data Parameters
NAME      swk5165crude
EXPNO     1
PROCNO    1

F2 - Acquisition Parameters
Date_     20140711
Time      21.21
INSTRUM   spect
PROBHD    5 mm PABBO BB-
PULPROG   zg30
TD         65536
SOLVENT   CDCl3
NS         8
DS         0
SWH        8012.820 Hz
FIDRES     0.122266 Hz
AQ         4.0894465 sec
RG         178.34
DW         62.400 usec
DE         6.50 usec
TE         313.5 K
D1         1.00000000 sec
TDO        1

----- CHANNEL f1 -----
SF01      399.9824700 MHz
NUC1      1H
P1         12.38 usec
PLW1      11.199999981 W

F2 - Processing parameters
SI         65536
SF         399.9800081 MHz
WDW        EM
SSB        0
LB         0.30 Hz
GB         0
PC         1.00
  
```

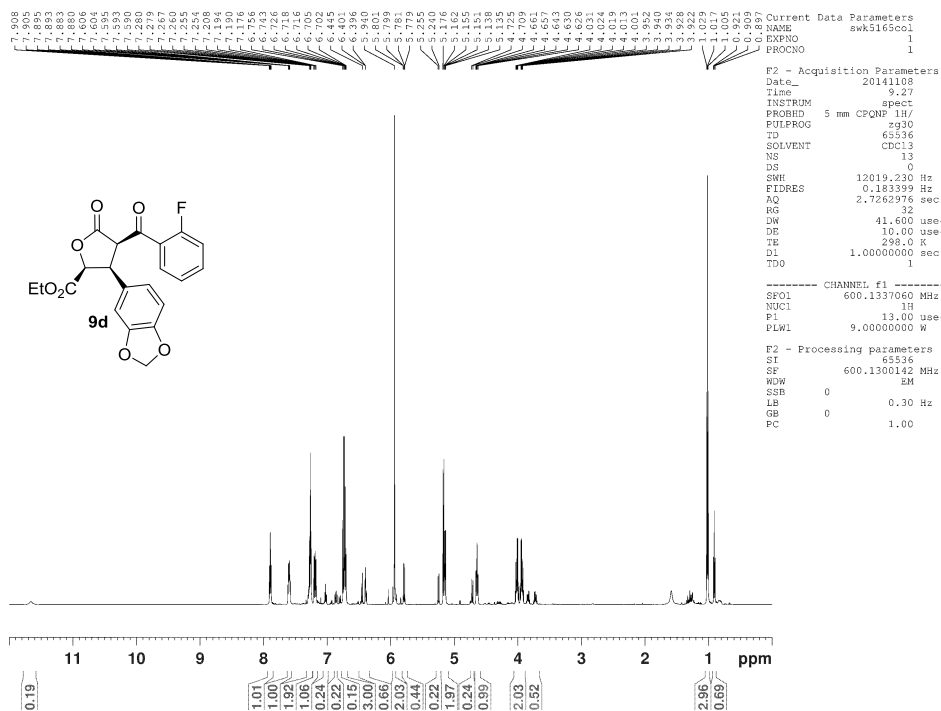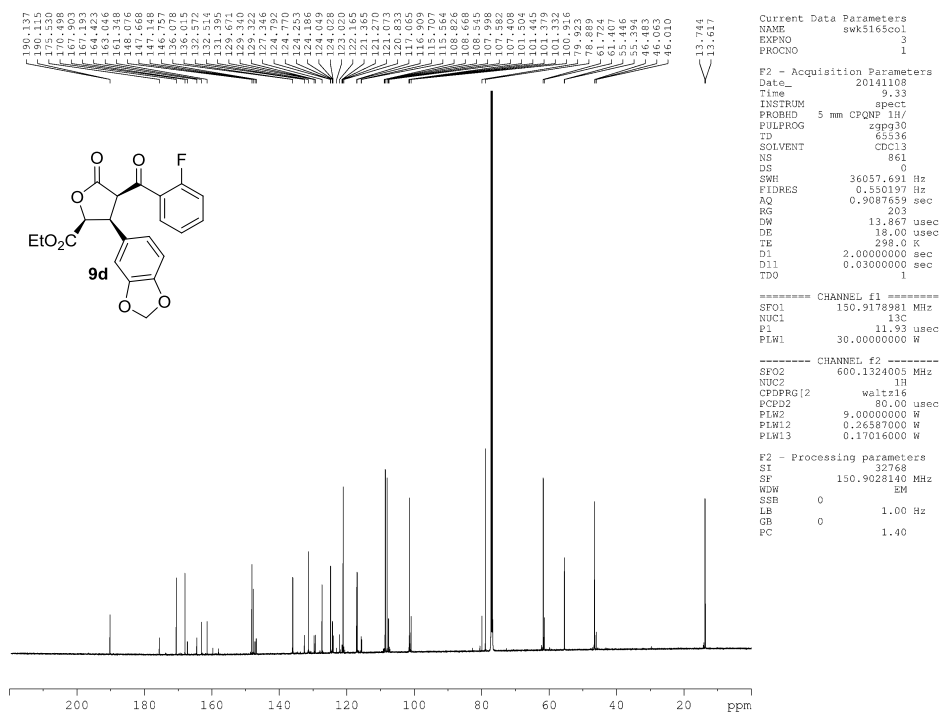

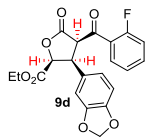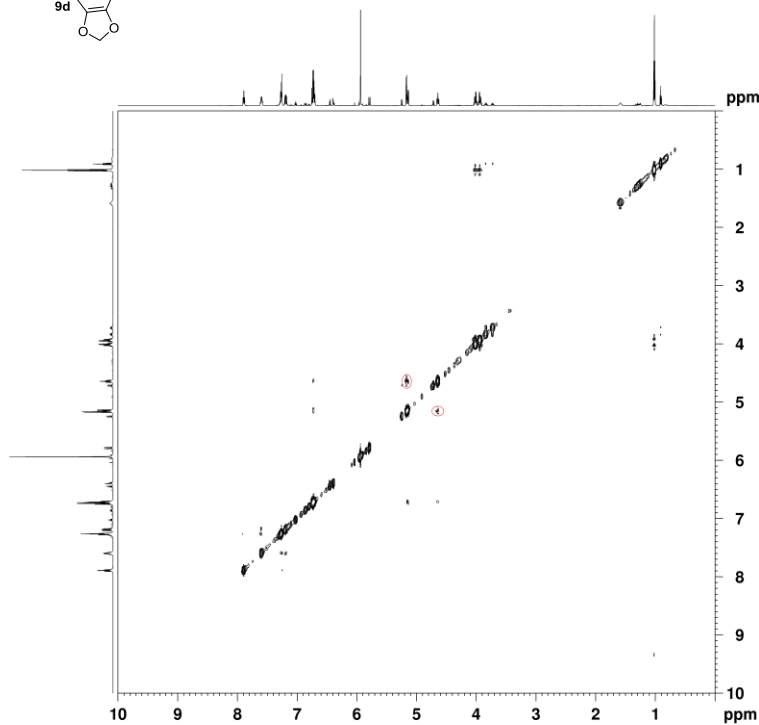

```

Current Data Parameters
NAME      swk5165col
EXPNO    4
PROCNO   1

F2 - Acquisition Parameters
Date_    20141108
Time     10.18
INSTRUM  spect
PROBHD   5 mm CPQNP 1H/
PULPROG  noesypphpgp
TD        2048
SOLVENT  CDCl3
NS        4
DS        32
SWH       6009.613 Hz
FIDRES    2.934382 Hz
AQ        0.1703936 sec
RG        203
DW        83.200 usec
DE        10.00 usec
TE        298.0 K
D0        0.00006665 sec
D1        2.00000000 sec
D8        0.30000001 sec
D11       0.03000000 sec
D12       0.00002000 sec
D16       0.00020000 sec
INO       0.00016640 sec

----- CHANNEL f1 -----
SF01     600.1327625 MHz
NUC1     1H
P1       13.00 usec
P2       26.00 usec
P17      2500.00 usec
PLM1     9.00000000 W
PLW1     2.25000000 W

----- GRADIENT CHANNEL ---
GPMAM[1] SMSQ10.100
GP21     40.00 %
F16      1000.00 usec

F1 - Acquisition parameters:
TD        256
SF01     600.1328 MHz
FIDRES    23.475060 Hz
SW        10.014 ppm
FhMODE    States-TPPI

F2 - Processing parameters
SI        1024
SF        600.1300140 MHz
WDW       QSINE
SSB       2
LB        0 Hz
GB        0
PC        1.00
  
```

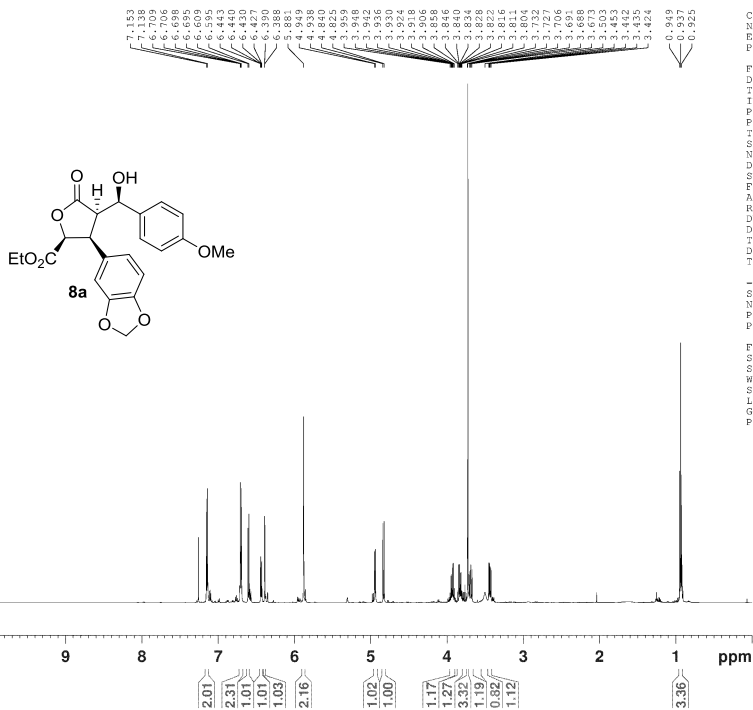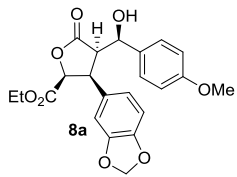

```

Current Data Parameters
NAME      swk5276curde
EXPNO    2
PROCNO   1

F2 - Acquisition Parameters
Date_    20141117
Time     21.46
INSTRUM  spect
PROBHD   5 mm CPQNP 1H/
PULPROG  zg30
TD        65536
SOLVENT  CDCl3
NS        16
DS        2
SWH       12019.230 Hz
FIDRES    0.183399 Hz
AQ        2.7262976 sec
RG        32
DW        41.600 usec
DE        10.00 usec
TE        298.0 K
D1        1.00000000 sec
TD0       1

----- CHANNEL f1 -----
SF01     600.1337060 MHz
NUC1     1H
P1       13.00 usec
PLW1     9.00000000 W

F2 - Processing parameters
SI        65536
SF        600.1300155 MHz
WDW       EM
SSB       0
LB        0.30 Hz
GB        0
PC        1.00
  
```

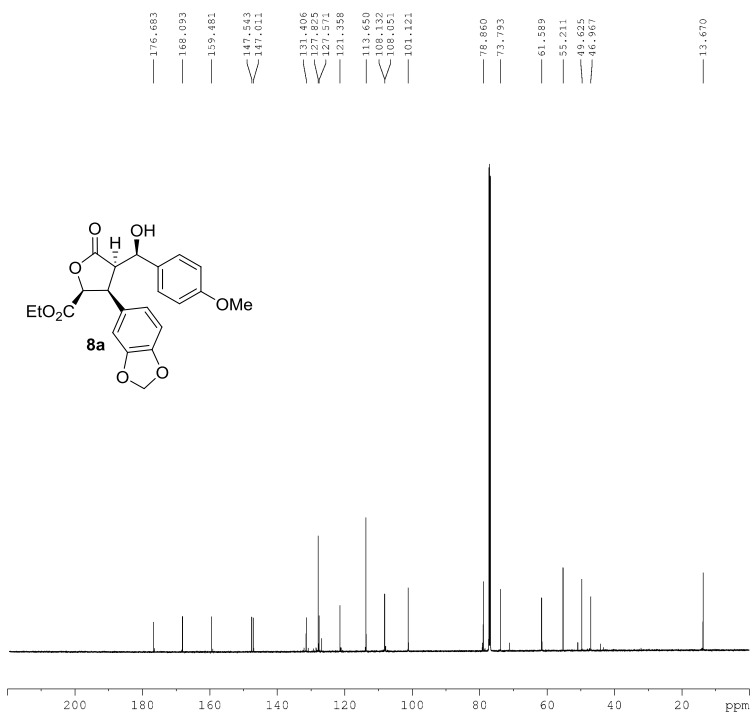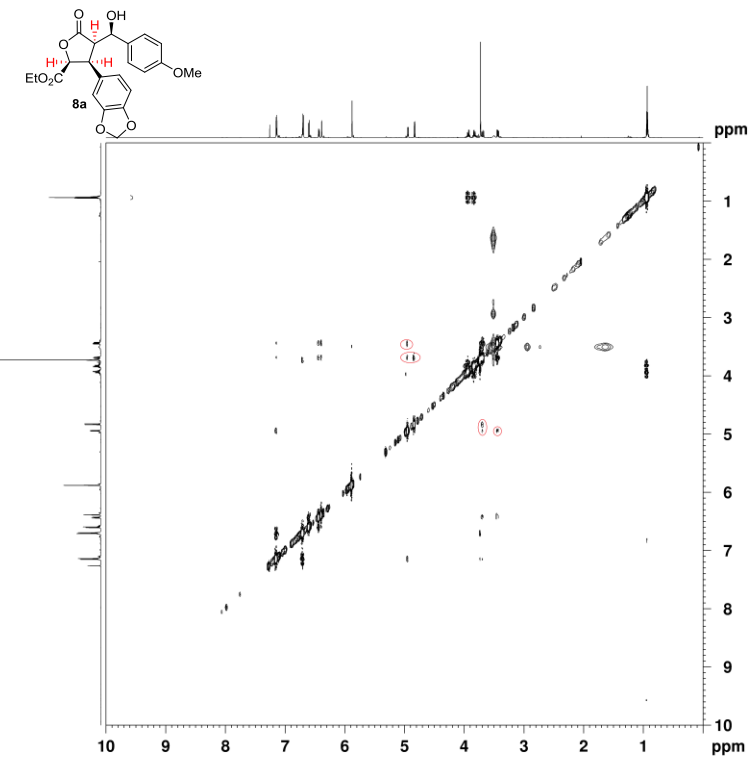

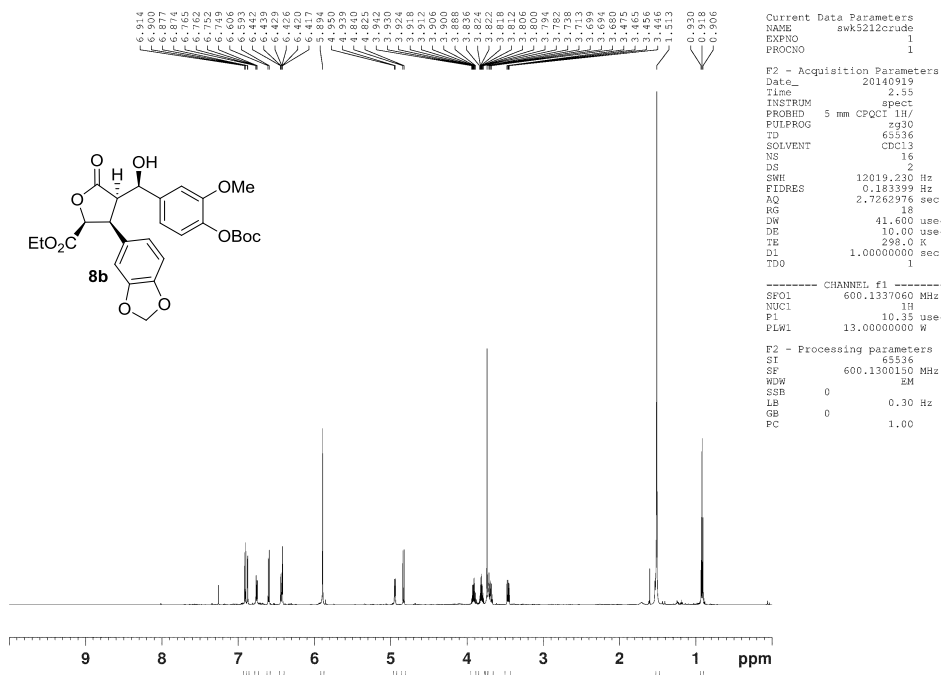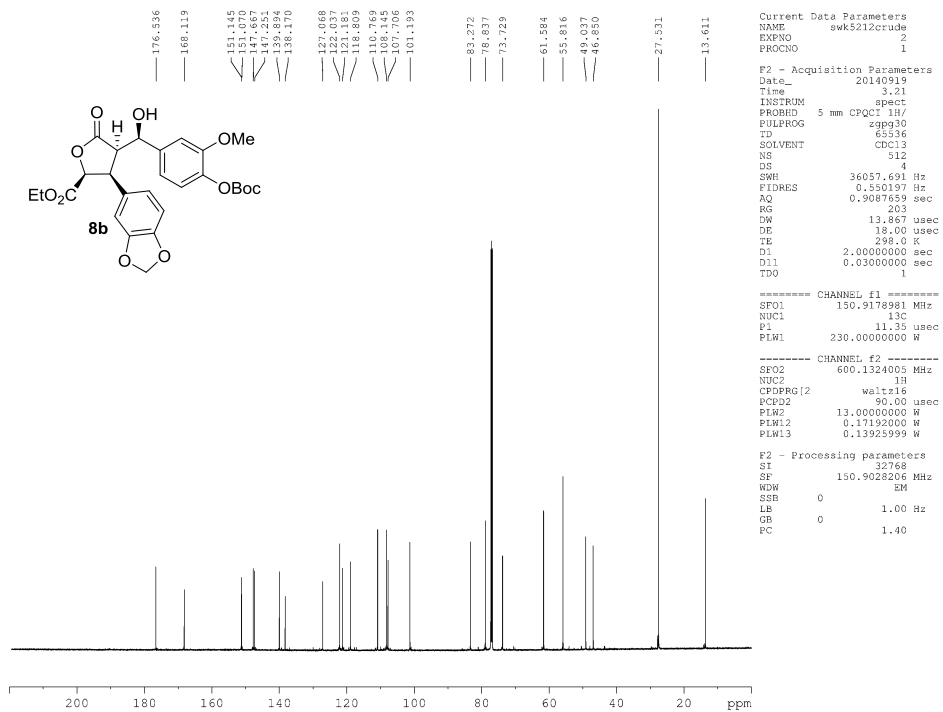



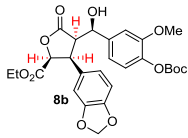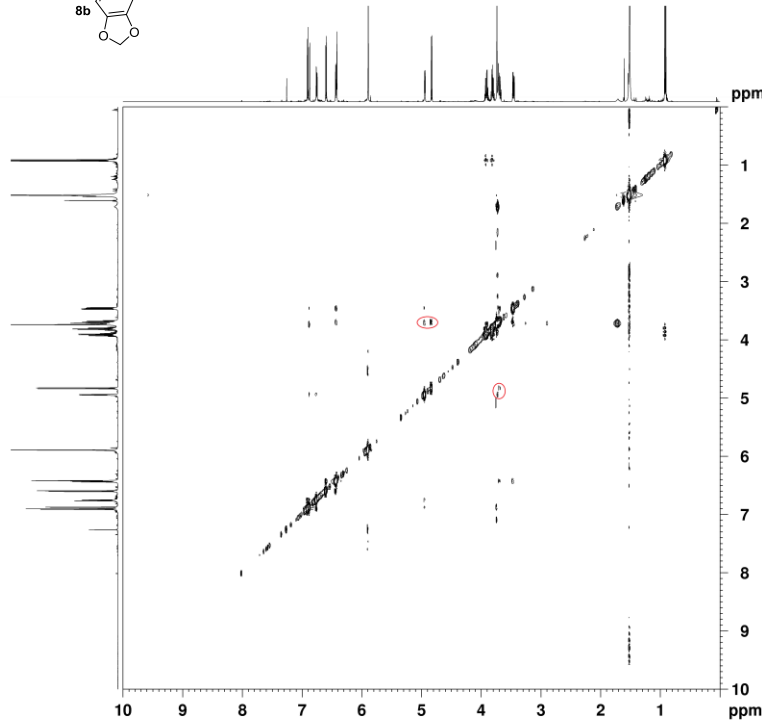

```

Current Data Parameters
Date_ 20140919
NAME swk5212crude
EXPNO 3
PROCNO 1

F2 - Acquisition Parameters
Date_ 20140919
Time 3.23
INSTRUM spect
PROBHD 5 mm CPQCI 1H/
PULPROG noesypphpgp
TD 2048
SOLVENT CDCl3
NS 4
DS 32
SWH 6009.619 Hz
FIDRES 2.934382 Hz
AQ 0.1703936 sec
RG 32
DW 83.200 usec
DE 10.00 usec
TE 298.0 K
D0 0.00007002 sec
D1 2.00000000 sec
DS 0.30000001 sec
D11 0.03000000 sec
D12 0.00002000 sec
D16 0.00020000 sec
INO 0.00016640 sec

----- CHANNEL f1 -----
SF01 600.1327625 MHz
NUC1 1H
P1 10.35 usec
P2 20.70 usec
P17 2500.00 usec
PLM1 13.00000000 W
PLW10 2.05999994 W

----- GRADIENT CHANNEL ---
GPMAM[1] SMSQ10.100
GP21 40.00 %
P16 1000.00 usec

F1 - Acquisition parameters:
TD 256
SF01 600.1328 MHz
FIDRES 23.475060 Hz
SW 10.014 ppm
FMODE States-1TPI

F2 - Processing parameters
SI 1024
SF 600.1300109 MHz
WDW QSINE
SSB 2
LB 0 Hz
GB 0
PC 1.00
  
```

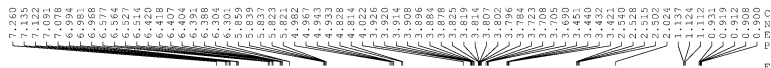

```

Current Data Parameters
Date_ 20141107
NAME swk5229c01
EXPNO 1
PROCNO 1

F2 - Acquisition Parameters
Date_ 20141107
Time 12.58
INSTRUM spect
PROBHD 5 mm CPQNF 1H/
PULPROG zg30
TD 65536
SOLVENT CDCl3
NS 16
DS 2
SWH 12019.230 Hz
FIDRES 0.183399 Hz
AQ 2.7262976 sec
RG 22.6
DW 41.600 usec
DE 10.00 usec
TE 298.0 K
D1 1.00000000 sec
TD0 1

----- CHANNEL f1 -----
SF01 600.1337060 MHz
NUC1 1H
P1 13.00 usec
PLW1 9.00000000 W

F2 - Processing parameters
SI 65536
SF 600.1300142 MHz
WDW EM
SSB 0
LB 0.30 Hz
GB 0
PC 1.00
  
```

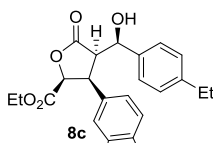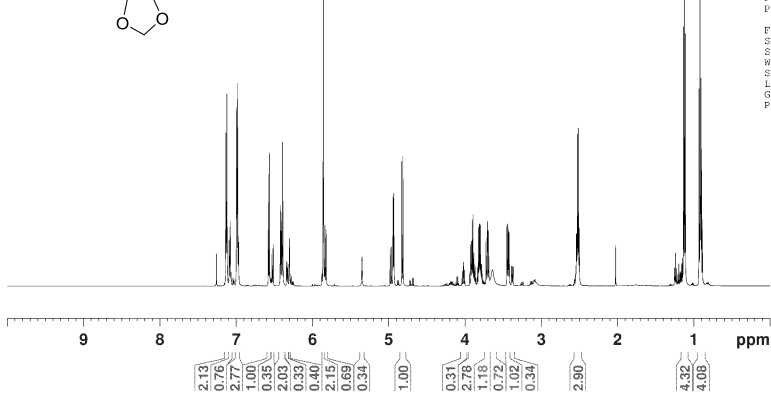

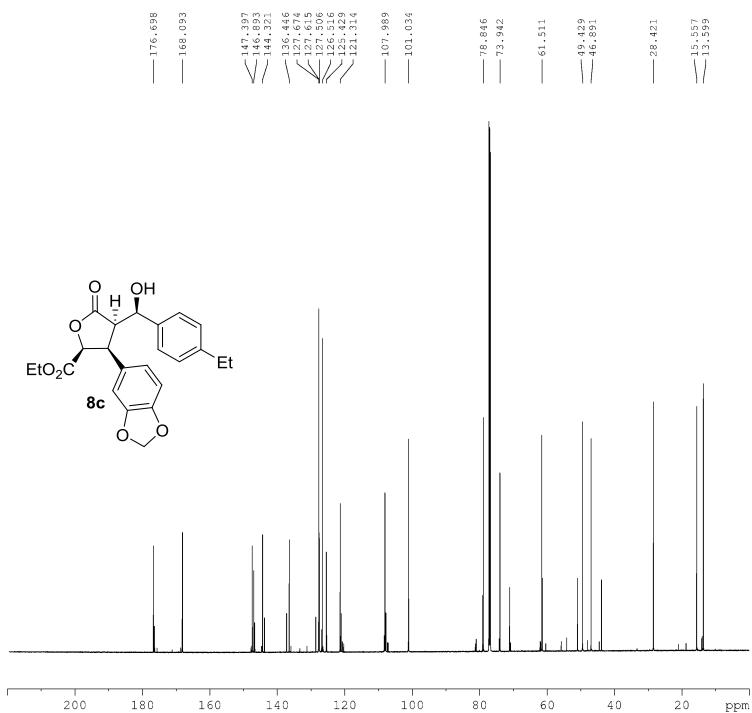

```

Current Data Parameters
NAME          swk5229c01
EXPNO        2
PROCNO       1

F2 - Acquisition Parameters
Date_        20141107
Time         13.12
INSTRUM      spect
PROBHD       5 mm CPQNP 1H/
PULPROG      zgpg30
TD           65536
SOLVENT      CDCl3
NS           256
DS           4
SWH          36057.691 Hz
FIDRES       0.550197 Hz
AQ           0.9087659 sec
RG           203
DM           13.867 usec
DE           18.00 usec
TE           298.0 K
D1           2.0000000 sec
D11          0.0300000 sec
TDO         1

----- CHANNEL f1 -----
SFO1         150.9178981 MHz
NUC1         13C
P1           11.93 usec
PLW1         30.0000000 W

----- CHANNEL f2 -----
SFO2         600.1324005 MHz
NUC2         1H
CPDPRG2      waltz16
PCPD2        80.00 usec
PLW2         9.0000000 W
PLW12        0.26587000 W
PLW13        0.17016000 W

F2 - Processing parameters
SI           32768
SF           150.9028238 MHz
WDW          EM
SSB          0
LB           1.00 Hz
GB           0
PC           1.40
  
```

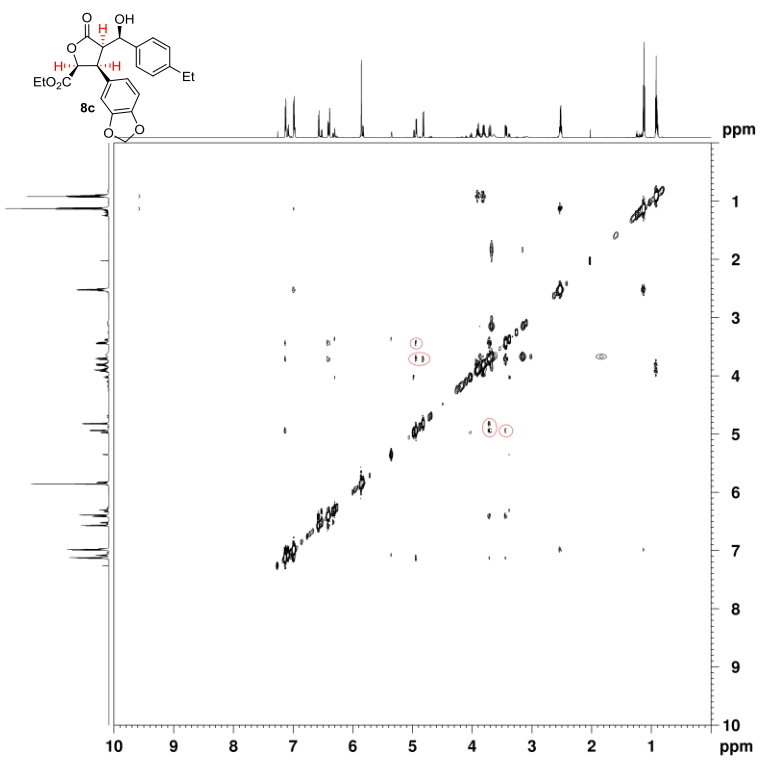

```

Current Data Parameters
NAME          swk5229c01
EXPNO        3
PROCNO       1

F2 - Acquisition Parameters
Date_        20141117
Time         22.38
INSTRUM      spect
PROBHD       5 mm CPQNP 1H/
PULPROG      noesygpppp
TD           2048
SOLVENT      CDCl3
NS           4
DS           32
SWH          6009.615 Hz
FIDRES       2.934382 Hz
AQ           0.1703936 sec
RG           28.5
DM           83.200 usec
DE           10.00 usec
TE           298.0 K
D0           0.0000665 sec
D1           2.0000000 sec
D8           0.3000001 sec
D11          0.4300000 sec
D12          0.0002000 sec
D16          0.0002000 sec
D19          0.0001640 sec

----- CHANNEL f1 -----
SFO1         600.1327625 MHz
NUC1         1H
P1           13.00 usec
P2           26.00 usec
P17          2500.00 usec
PLW1         9.0000000 W
PLW10        2.2500000 W

----- GRADIENT CHANNEL -----
GPNAM[1]     SMSG1D.100
GP1          40.00 %
P16          1000.00 usec

F1 - Acquisition parameters
TD           256
SFO1         600.1328 MHz
FIDRES       23.475060 Hz
SW           10.014 ppm
F0MODE       States-TPPI

F2 - Processing parameters
SI           1324
SF           600.1300108 MHz
WDW          QSINE
SSB          2
LB           0 Hz
GB           0
PC           1.00
  
```

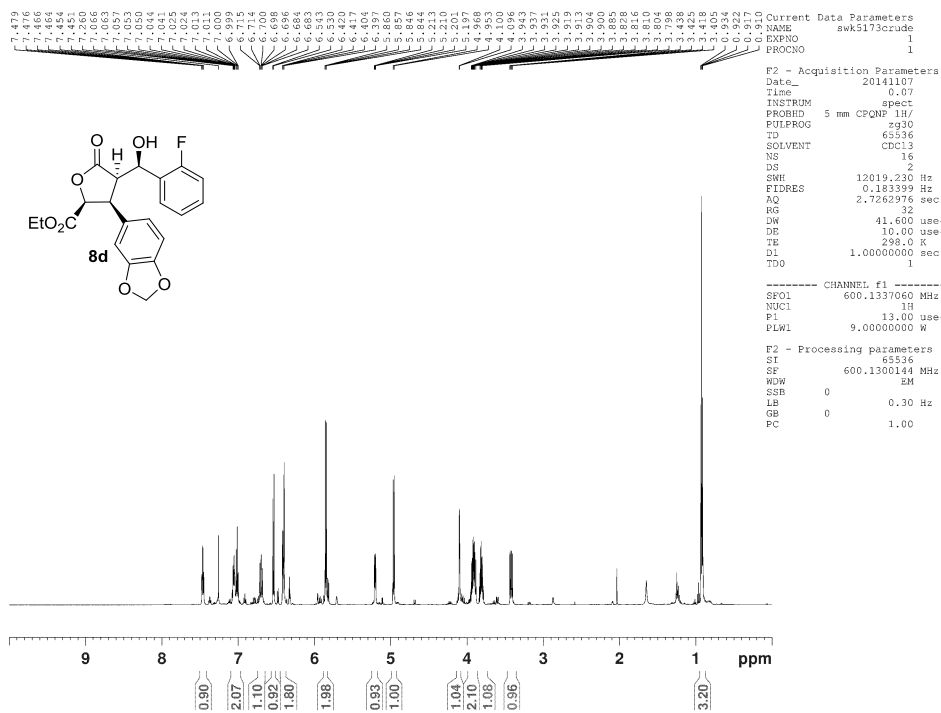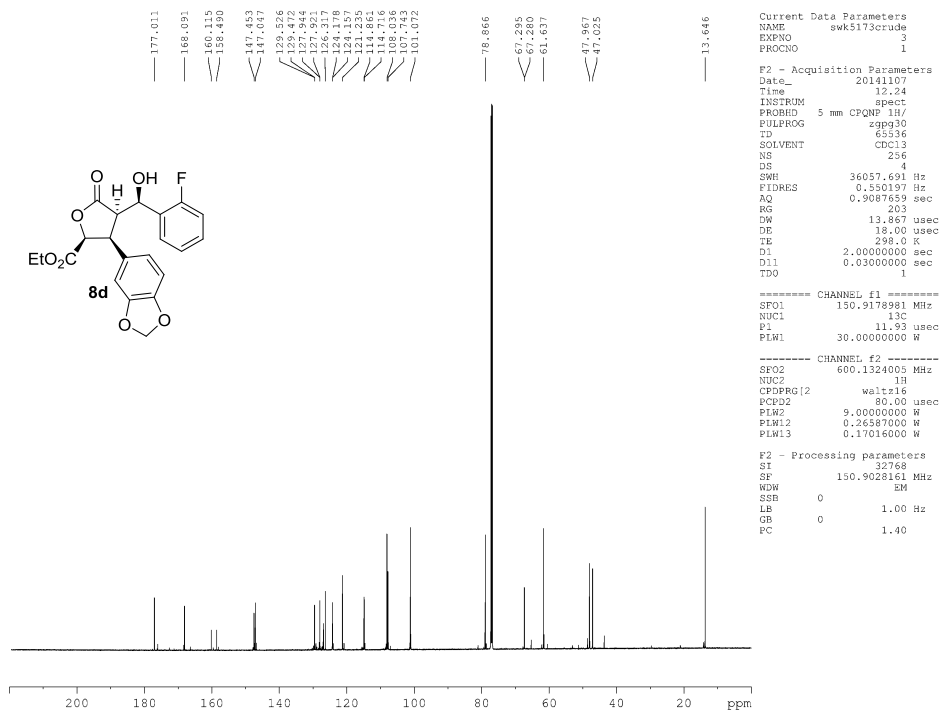

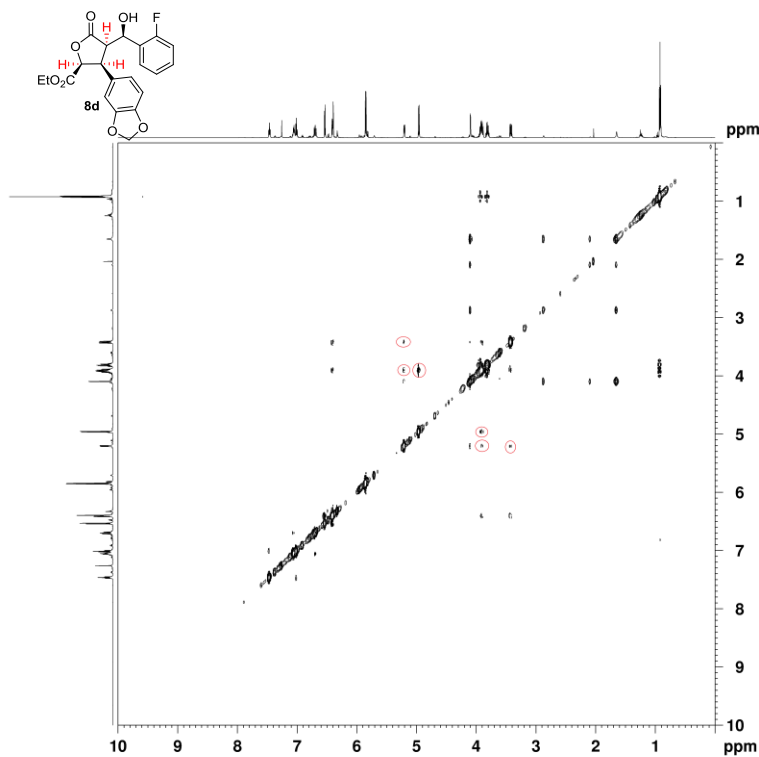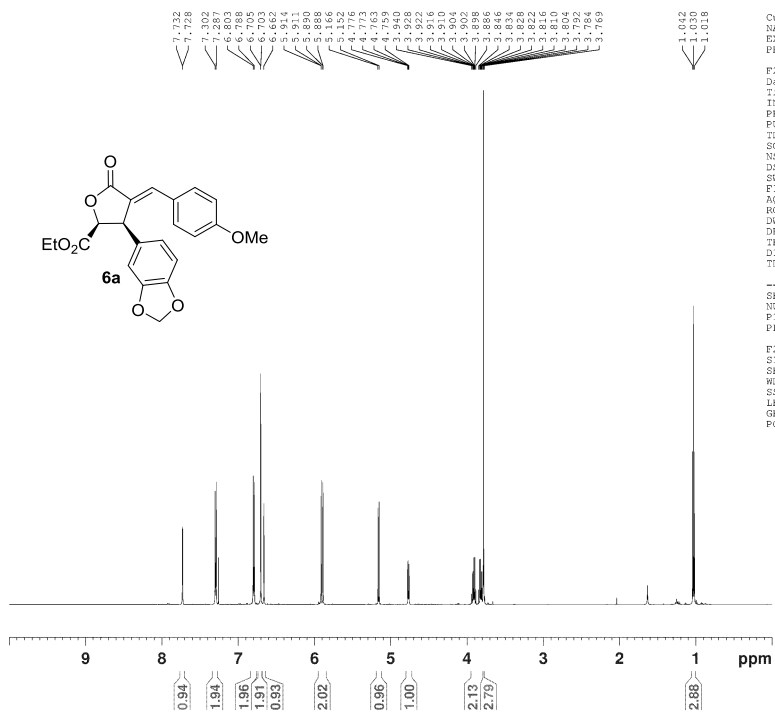

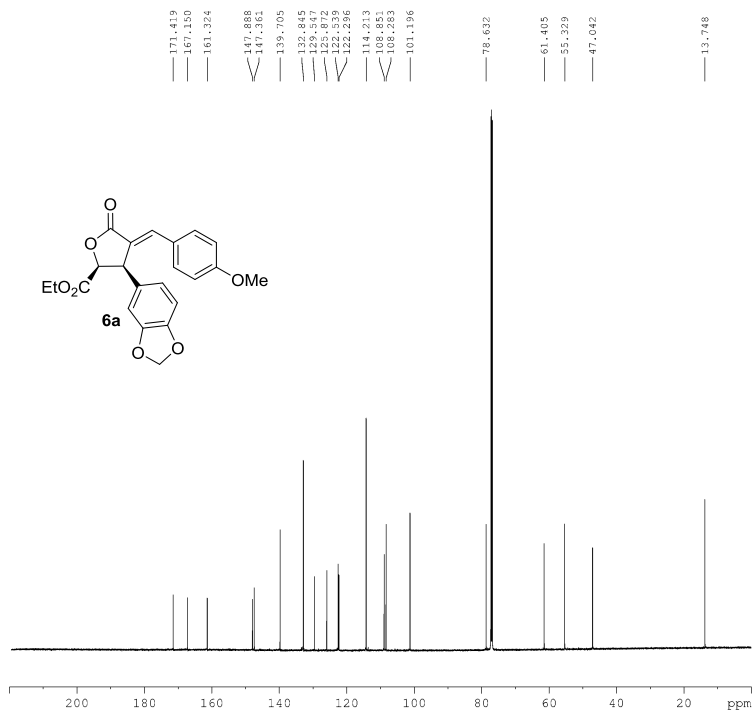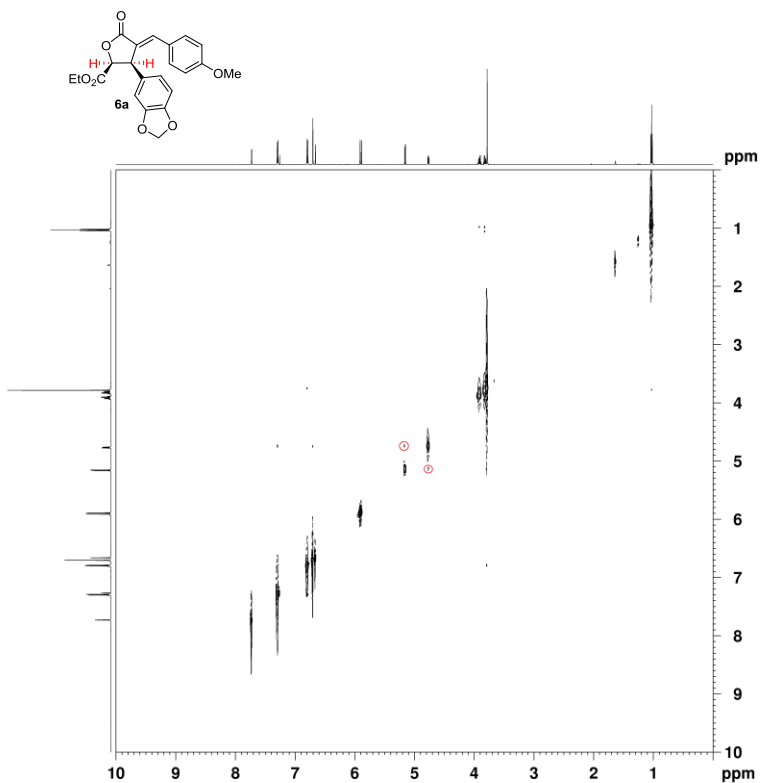





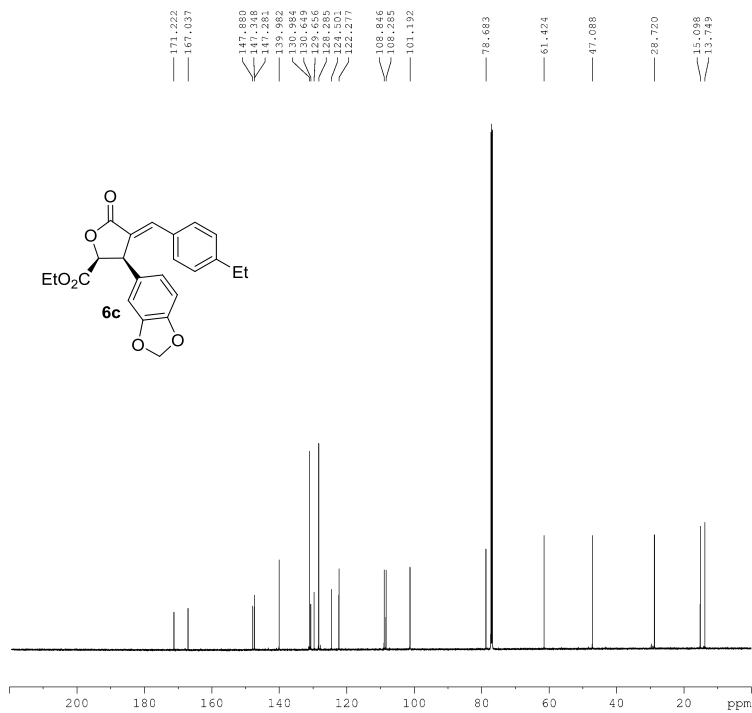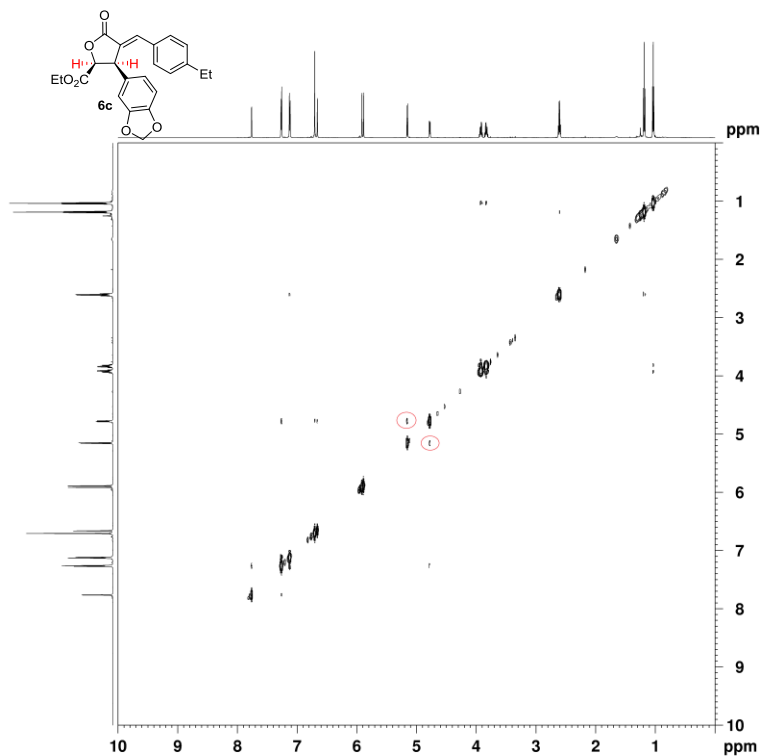



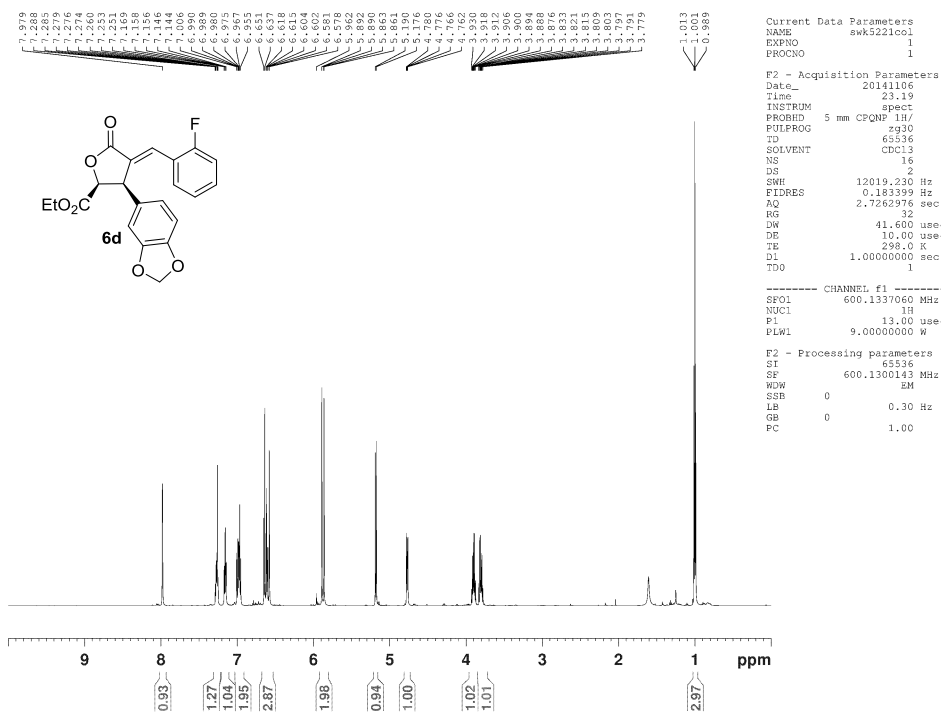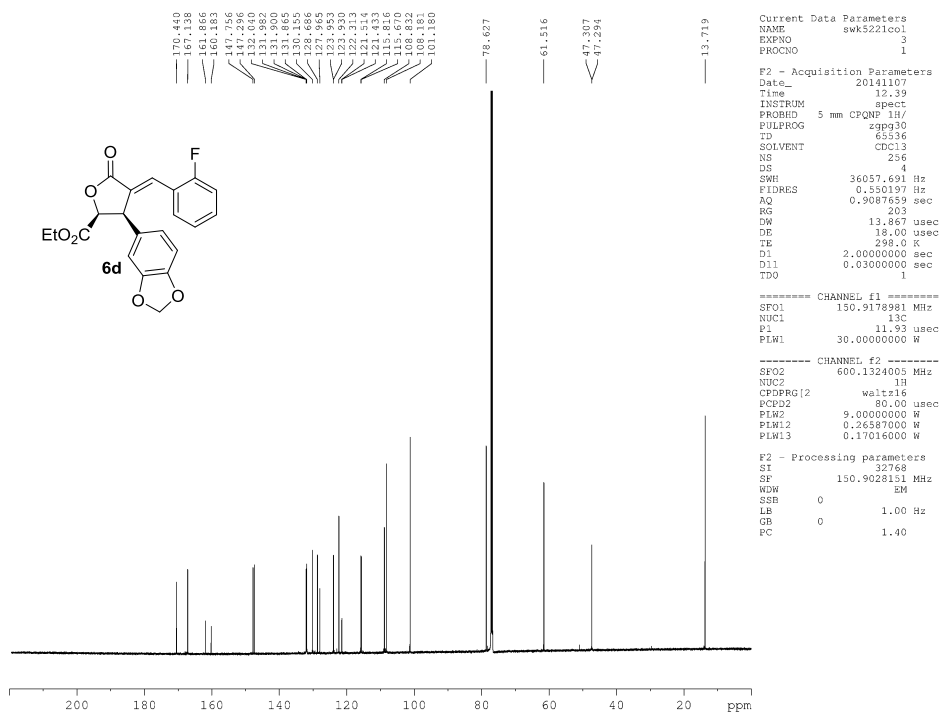

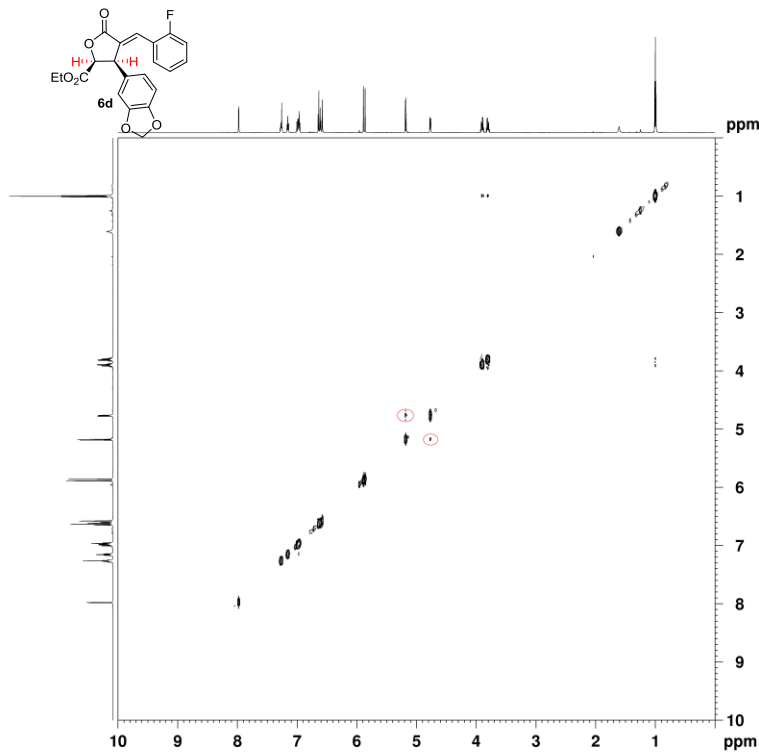

```

Current Data Parameters
NAME      swk5221col
EXPNO    2
PROCNO   1

F2 - Acquisition Parameters
Date_    20141106
Time     23.21
INSTRUM  spect
PROBHD   5 mm CPQNP 1H/
PULPROG  noesypphpgp
TD       2048
SOLVENT  CDCl3
NS       4
DS       32
SWH      6009.618 Hz
FIDRES   2.934382 Hz
AQ       0.1703936 sec
RG       203
DW       83.200 usec
DE       10.00 usec
TE       298.0 K
D0       0.00006665 sec
D1       2.00000000 sec
D8       0.30000001 sec
D11      0.03000000 sec
D12      0.00002000 sec
D16      0.00020000 sec
INO      0.00016640 sec

----- CHANNEL f1 -----
SF01    600.1327625 MHz
NUC1    1H
P1      13.00 usec
P2      26.00 usec
P17     2500.00 usec
PLM1    9.00000000 W
PLM10   2.25000000 W

----- GRADIENT CHANNEL ---
GPMAM[1] SMSQ10.100
GP21    40.00 %
P16     1000.00 usec

F1 - Acquisition parameters:
TD       256
SF01    600.1328 MHz
FIDRES   23.475060 Hz
SW       10.014 ppm
FhMODE   States-TPPI

F2 - Processing parameters
SI       1024
SF       600.1300151 MHz
WDW      QSINE
SSB      2
LB       0 Hz
GB       0
PC       1.00
  
```

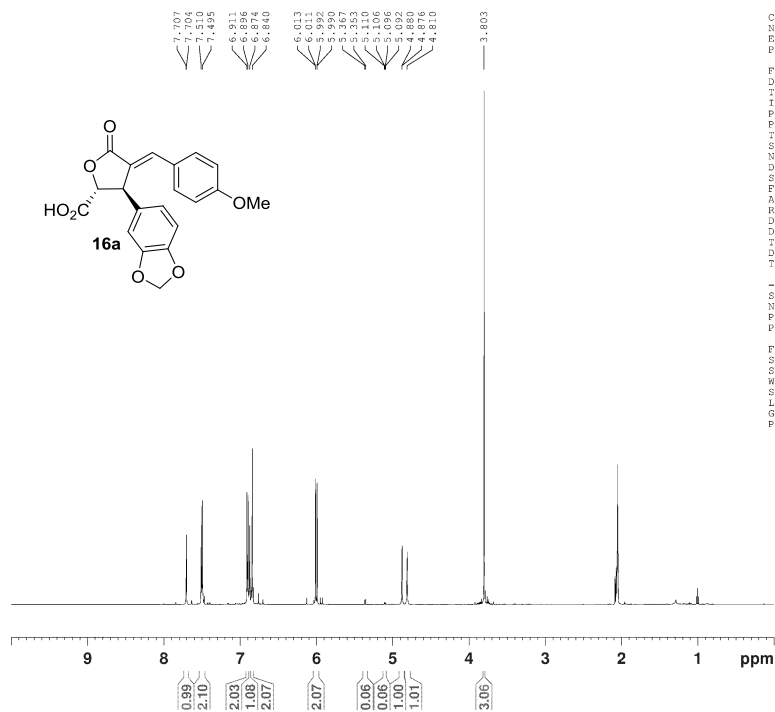

```

Current Data Parameters
NAME      swk5144wash
EXPNO    2
PROCNO   1

F2 - Acquisition Parameters
Date_    20140919
Time     4.10
INSTRUM  spect
PROBHD   5 mm CPQCT 1H/
PULPROG  zg30
TD       65536
SOLVENT  Acetone
NS       16
DS       2
SWH      12019.230 Hz
FIDRES   0.183399 Hz
AQ       2.7262976 sec
RG       25.4
DW       41.600 usec
DE       10.00 usec
TE       298.0 K
D1       1.00000000 sec
TD0      1

----- CHANNEL f1 -----
SF01    600.1337060 MHz
NUC1    1H
P1      10.35 usec
PLW1    13.00000000 W

F2 - Processing parameters
SI       65536
SF       600.1300104 MHz
WDW      EM
SSB      0
LB       0.30 Hz
GB       0
PC       1.00
  
```

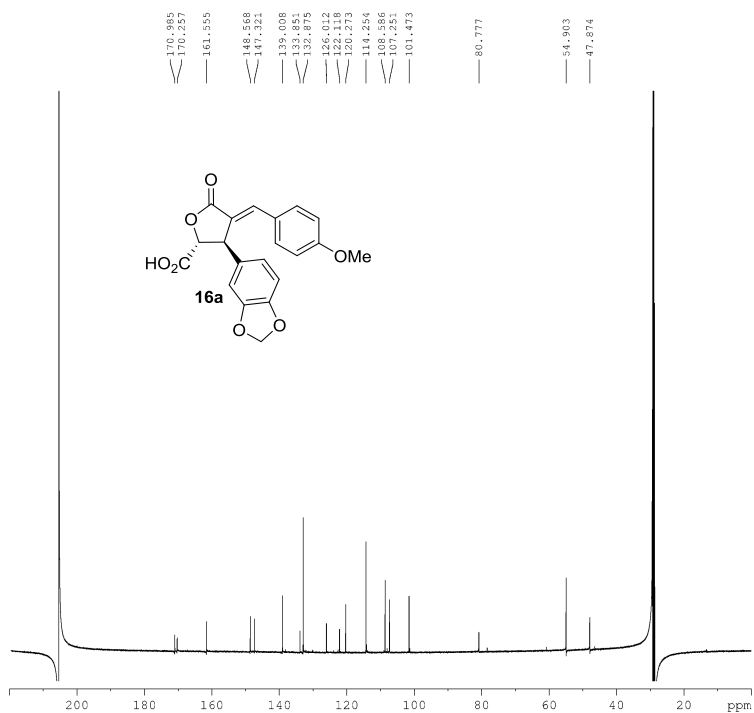

Current Data Parameters  
 NAME swk5144wash  
 EXPNO 3  
 PROCNO 1

F2 - Acquisition Parameters  
 Date\_ 20140919  
 Time 4.36  
 INSTRUM spect  
 PROBHD 5 mm CPQCI 1H/  
 PULPROG zgpg30  
 ID 65536  
 SOLVENT Acetone  
 NS 512  
 DS 4  
 SMH 36057.691 Hz  
 FIDRES 0.550197 Hz  
 AQ 0.9087659 sec  
 RG 203  
 DW 13.867 usec  
 DE 18.00 usec  
 TE 298.0 K  
 D1 2.0000000 sec  
 D11 0.0300000 sec  
 TDO 1

----- CHANNEL f1 -----  
 SF01 150.9178981 MHz  
 NUC1 13C  
 P1 11.35 usec  
 PLW1 230.0000000 W

----- CHANNEL f2 -----  
 SF02 600.1324005 MHz  
 NUC2 1H  
 CPDPRG2 waltz16  
 PCPD2 90.00 usec  
 PLW2 13.0000000 W  
 PLW12 0.17192000 W  
 PLW13 0.13925999 W

F2 - Processing parameters  
 SI 32768  
 SF 150.9028090 MHz  
 WDW EM  
 SSB 0  
 LB 1.00 Hz  
 GB 0  
 PC 1.40

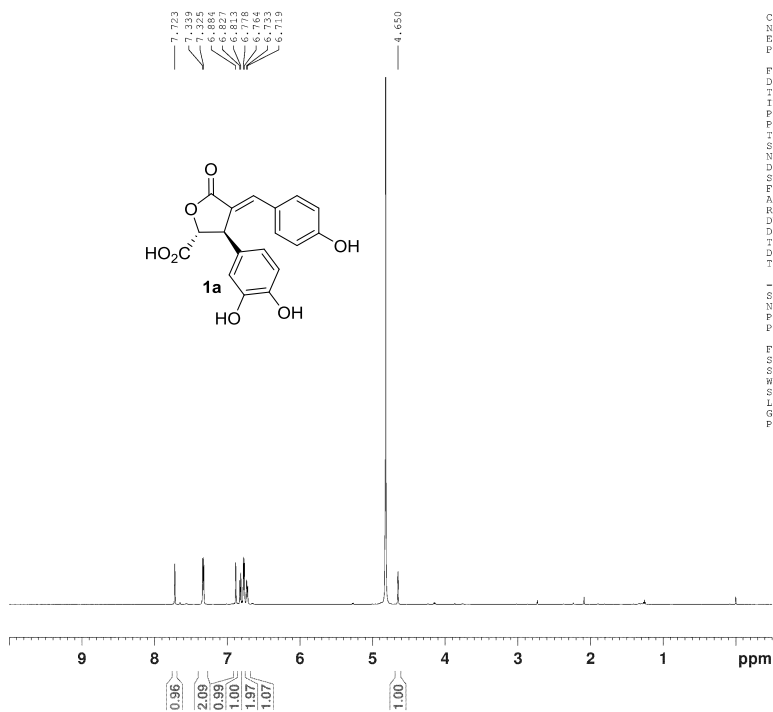

Current Data Parameters  
 NAME swk5292HPLC  
 EXPNO 1  
 PROCNO 1

F2 - Acquisition Parameters  
 Date\_ 20141219  
 Time 0.01  
 INSTRUM spect  
 PROBHD 5 mm CPQNF 1H/  
 PULPROG zg30  
 ID 65536  
 SOLVENT D2O  
 NS 16  
 DS 2  
 SMH 12019.230 Hz  
 FIDRES 0.183399 Hz  
 AQ 2.7263976 sec  
 RG 71.8  
 DW 41.600 usec  
 DE 10.00 usec  
 TE 298.1 K  
 D1 1.0000000 sec  
 TDO 1

----- CHANNEL f1 -----  
 SF01 600.1337060 MHz  
 NUC1 1H  
 P1 13.00 usec  
 PLW1 9.0000000 W

F2 - Processing parameters  
 SI 65536  
 SF 600.1299301 MHz  
 WDW EM  
 SSB 0  
 LB 0.30 Hz  
 GB 0  
 PC 1.00

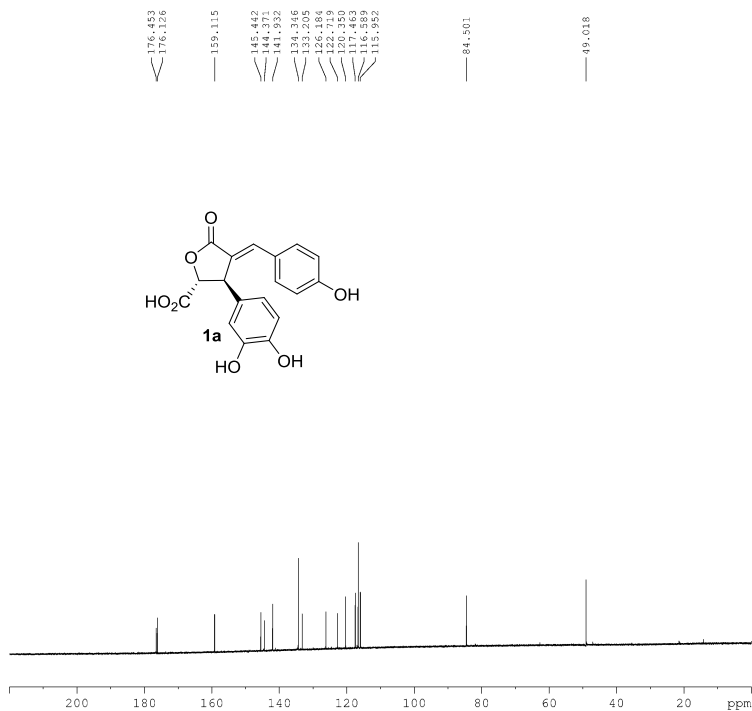

Current Data Parameters  
NAME swk5292HPTC  
EXPNO 3  
PROCNO 1

F2 - Acquisition Parameters  
Date\_ 20141219  
Time 2.57  
INSTRUM spect  
PROBHD 5 mm CPQNP 1H/  
PULPROG zgpg30  
TD 65536  
SOLVENT D2O  
NS 3500  
DS 4  
SMH 36057.691 Hz  
FIDRES 0.550197 Hz  
AQ 0.9087659 sec  
RG 203  
DM 13.867 usec  
DE 18.00 usec  
TE 298.0 K  
D1 2.00000000 sec  
D11 0.03000000 sec  
TDO 1

----- CHANNEL f1 -----  
SFO1 150.9178981 MHz  
NUC1 13C  
P1 11.00 usec  
PLW1 30.00000000 W

----- CHANNEL f2 -----  
SFO2 600.1324005 MHz  
NUC2 1H  
CPDPRG2 waltz16  
PCPD2 80.00 usec  
PLW2 9.00000000 W  
PLW12 0.26587000 W  
PLW13 0.17016000 W

F2 - Processing parameters  
SI 32768  
SF 150.9026548 MHz  
WDW EM  
SSB 0  
LB 1.00 Hz  
GB 0  
PC 1.40

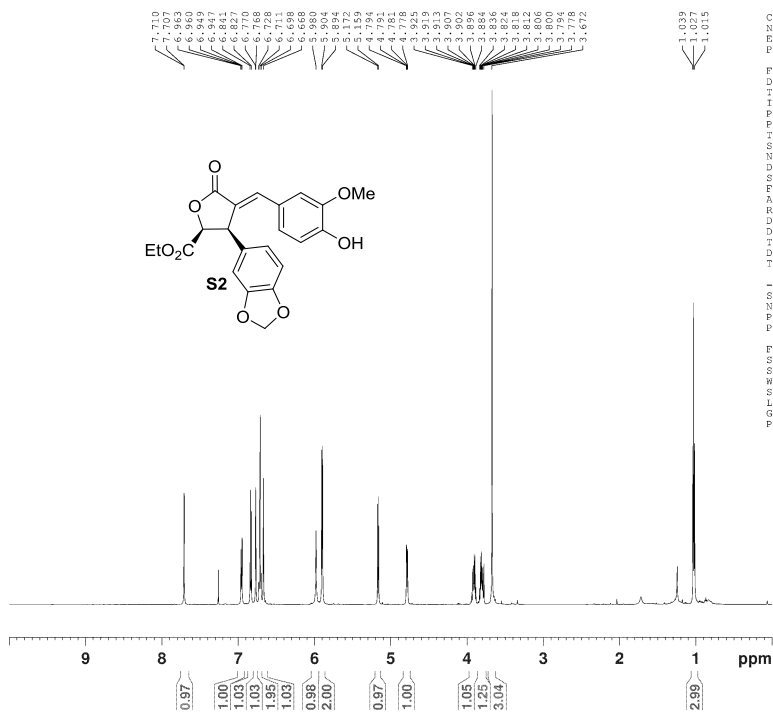

Current Data Parameters  
NAME swk5251col  
EXPNO 1  
PROCNO 1

F2 - Acquisition Parameters  
Date\_ 20140930  
Time 21.05  
INSTRUM spect  
PROBHD 5 mm CPOCT 1H/  
PULPROG zg30  
TD 65536  
SOLVENT CDCl<sub>3</sub>  
NS 6  
DS 0  
SMH 12019.230 Hz  
FIDRES 0.183399 Hz  
AQ 2.7262976 sec  
RG 12.7  
DW 41.600 usec  
DE 10.00 usec  
TE 298.0 K  
D1 1.00000000 sec  
TDO 1

----- CHANNEL f1 -----  
SFO1 600.1337060 MHz  
NUC1 1H  
P1 10.35 usec  
PLW1 13.00000000 W

F2 - Processing parameters  
SI 65536  
SF 600.1300151 MHz  
WDW EM  
SSB 0  
LB 0.30 Hz  
GB 0  
PC 1.00

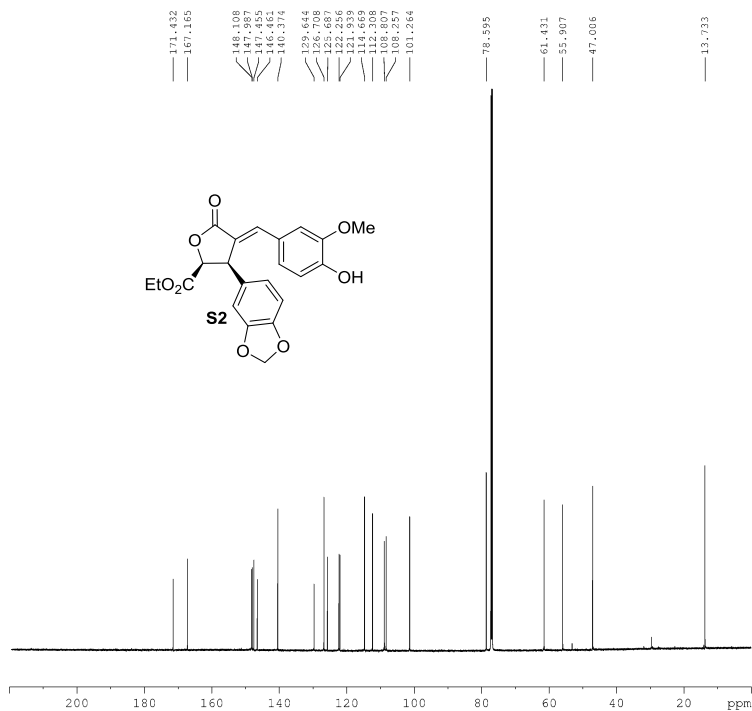

Current Data Parameters  
 NAME awk5251col  
 EXPNO 2  
 PROCNO 1

F2 - Acquisition Parameters  
 Date\_ 20140930  
 Time 21.13  
 INSTRUM spect  
 PROBHD 5 mm CPQCI 1H/  
 PULPROG zgpg30  
 TD 65536  
 SOLVENT CDCl3  
 NS 516  
 DS 0  
 SMH 36057.691 Hz  
 FIDRES 0.550197 Hz  
 AQ 0.9087659 sec  
 RG 203  
 DW 13.867 usec  
 DE 18.00 usec  
 TE 298.0 K  
 D1 2.0000000 sec  
 D11 0.0300000 sec  
 TDO 1

----- CHANNEL f1 -----  
 SFO1 150.9178981 MHz  
 NUC1 13C  
 P1 11.35 usec  
 PLW1 230.0000000 W

----- CHANNEL f2 -----  
 SFO2 600.1324005 MHz  
 NUC2 1H  
 CPDPRG2 waltz16  
 PCPD2 90.00 usec  
 PLH2 13.0000000 W  
 PLH12 0.17192000 W  
 PLH13 0.13925999 W

F2 - Processing parameters  
 SI 32768  
 SF 150.9028187 MHz  
 WDW EM  
 SSB 0  
 LB 1.00 Hz  
 GB 0  
 PC 1.40

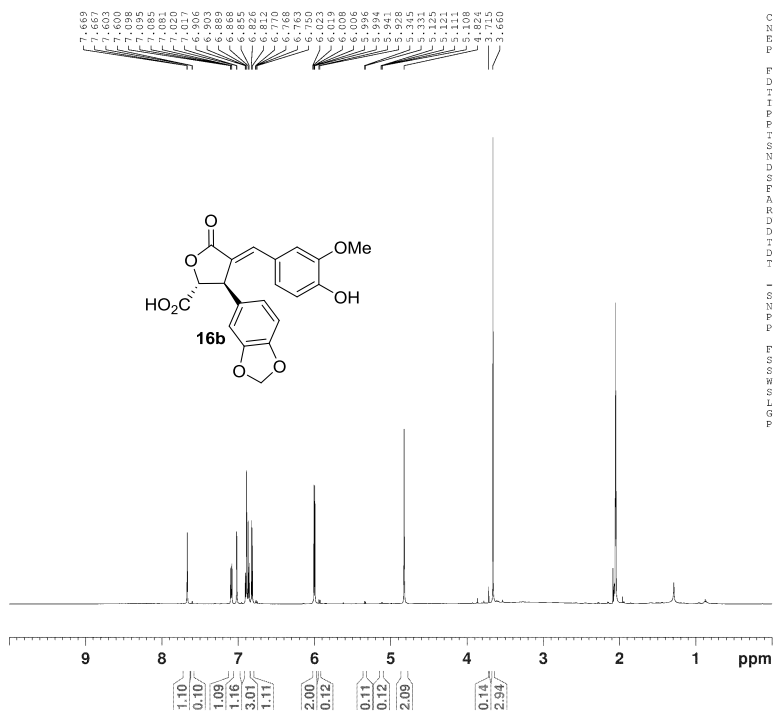

Current Data Parameters  
 NAME awk5286recovered  
 EXPNO 1  
 PROCNO 1

F2 - Acquisition Parameters  
 Date\_ 20141202  
 Time 15.54  
 INSTRUM spect  
 PROBHD 5 mm CPQNF 1H/  
 PULPROG zg30  
 TD 65536  
 SOLVENT Acetone  
 NS 16  
 DS 2  
 SMH 12019.230 Hz  
 FIDRES 0.183399 Hz  
 AQ 2.7262976 sec  
 RG 37  
 DW 41.600 usec  
 DE 10.00 usec  
 TE 298.0 K  
 D1 1.0000000 sec  
 TDO 1

----- CHANNEL f1 -----  
 SFO1 600.1337060 MHz  
 NUC1 1H  
 P1 13.00 usec  
 PLW1 9.0000000 W

F2 - Processing parameters  
 SI 65536  
 SF 600.1300102 MHz  
 WDW EM  
 SSB 0  
 LB 0.30 Hz  
 GB 0  
 PC 1.00

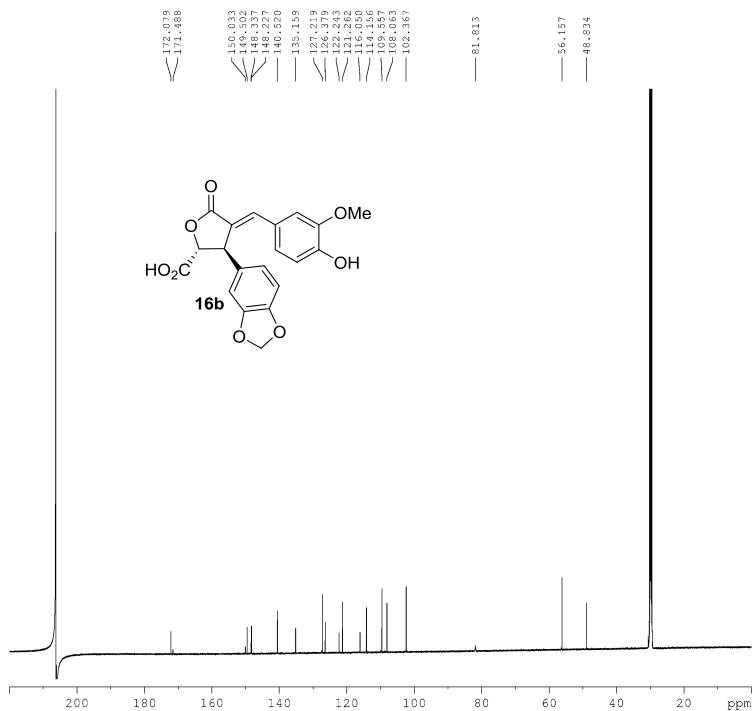

Current Data Parameters  
 NAME swk5286recovered  
 EXPNO 2  
 PROCNO 1

F2 - Acquisition Parameters  
 Date\_ 20141202  
 Time 15.58  
 INSTRUM spect  
 PROBHD 5 mm CPQNP 1H/  
 PULPROG zgpg30  
 TD 65536  
 SOLVENT Acetone  
 NS 1024  
 DS 0  
 SMH 36057.691 Hz  
 FIDRES 0.550197 Hz  
 AQ 0.9087659 sec  
 RG 203  
 DW 13.867 usec  
 DE 18.00 usec  
 TE 298.0 K  
 D1 2.0000000 sec  
 D11 0.0300000 sec  
 TDO 1

----- CHANNEL f1 -----  
 SF01 150.9178981 MHz  
 NUC1 13C  
 P1 11.93 usec  
 PLW1 30.0000000 W

----- CHANNEL f2 -----  
 SF02 600.1324005 MHz  
 NUC2 1H  
 CPDPRG2 waltz16  
 PCPD2 80.00 usec  
 PLW2 9.0000000 W  
 PLW12 0.26587000 W  
 PLW13 0.17016000 W

F2 - Processing parameters  
 SI 32768  
 SF 150.9026735 MHz  
 WDW EM  
 SSB 0  
 LB 1.00 Hz  
 GB 0  
 PC 1.40

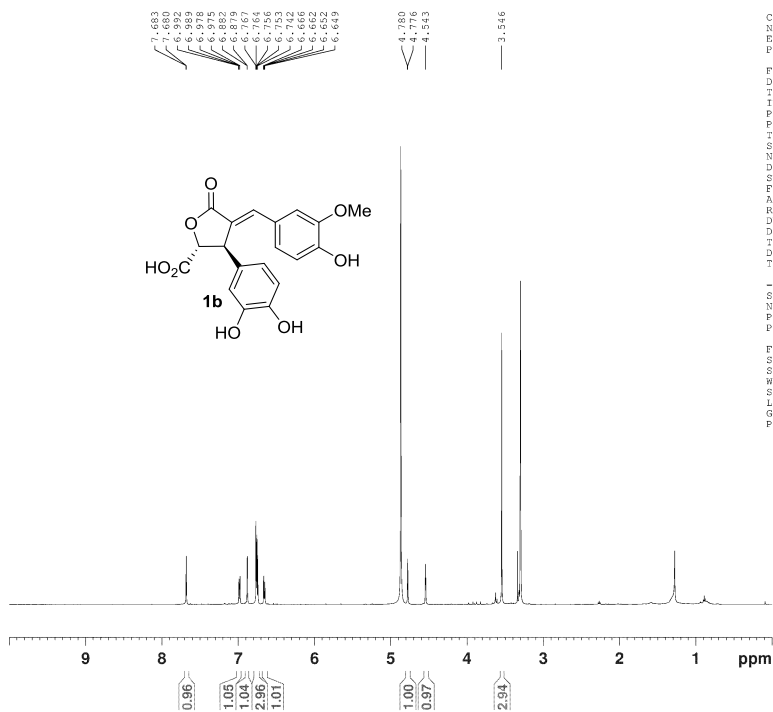

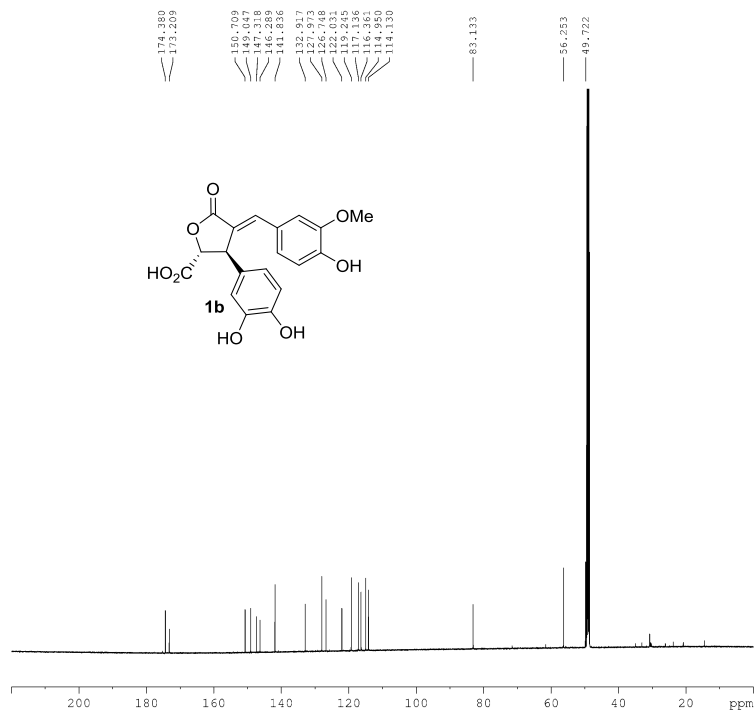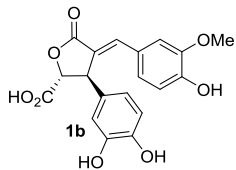

Current Data Parameters  
 NAME swk5295HPLExtract2  
 EXPNO 2  
 PROCNO 1

F2 - Acquisition Parameters  
 Date\_ 20141215  
 Time 22.56  
 INSTRUM spect  
 PROBED 5 mm CPQNP 1H/  
 PULPROG zgpg30  
 TD 65336  
 SOLVENT MeOD  
 NS 2372  
 DS 4  
 SMH 36057.691 Hz  
 FIDRES 0.550197 Hz  
 AQ 0.9087659 sec  
 RG 203  
 DM 13.867 usec  
 DE 18.00 usec  
 TE 298.0 K  
 D1 2.0000000 sec  
 D11 0.0300000 sec  
 TDO 1

----- CHANNEL f1 -----  
 SFO1 150.9178981 MHz  
 NUC1 13C  
 P1 11.93 usec  
 PLW1 30.0000000 W

----- CHANNEL f2 -----  
 SFO2 600.1324005 MHz  
 NUC2 1H  
 CPDPRG2 waltz16  
 PCPD2 80.00 usec  
 PLW2 9.0000000 W  
 PLW12 0.26587000 W  
 PLW13 0.17016000 W

F2 - Processing parameters  
 SI 32768  
 SF 150.9025970 MHz  
 NGW EM  
 SSB 0  
 LB 1.00 Hz  
 GB 0  
 PC 1.40

# Comparison of Authentic Shimobashiric Acid A to Synthetic Sample

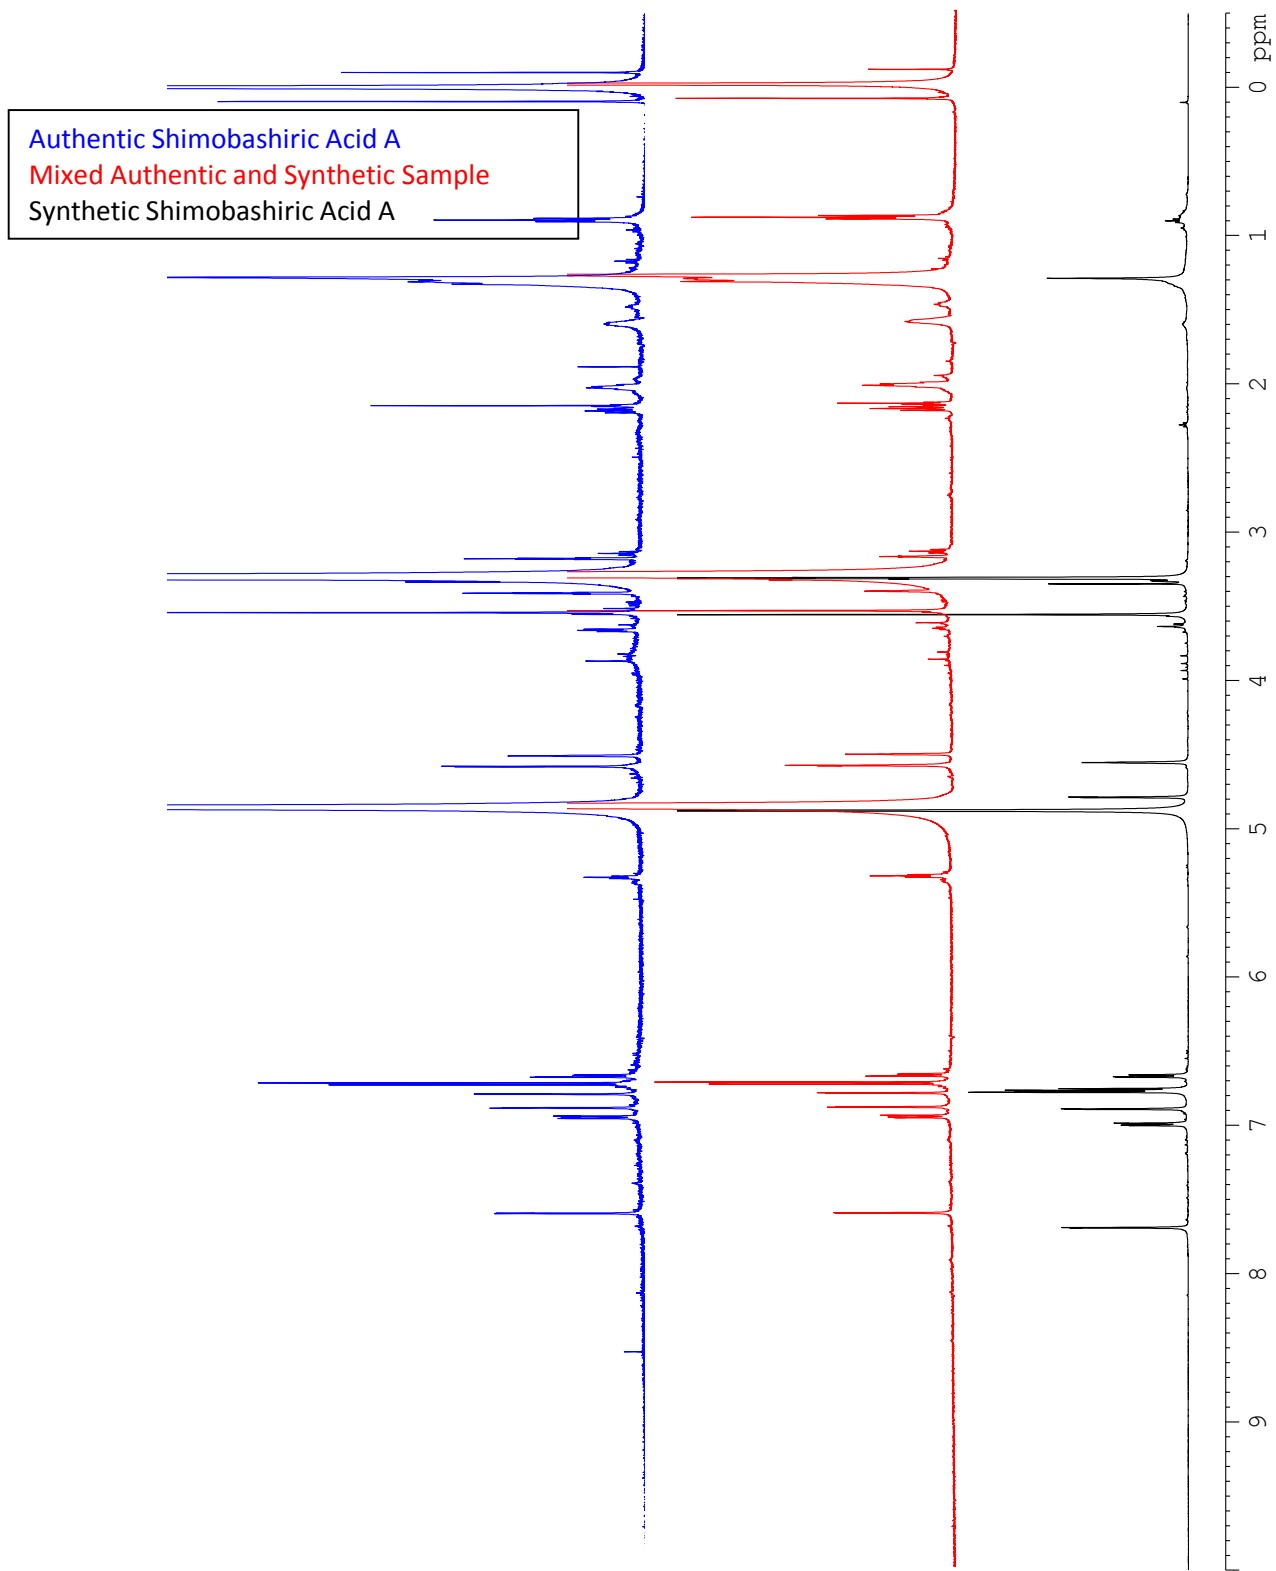



## SFC Traces

### SFC Analysis of 14a

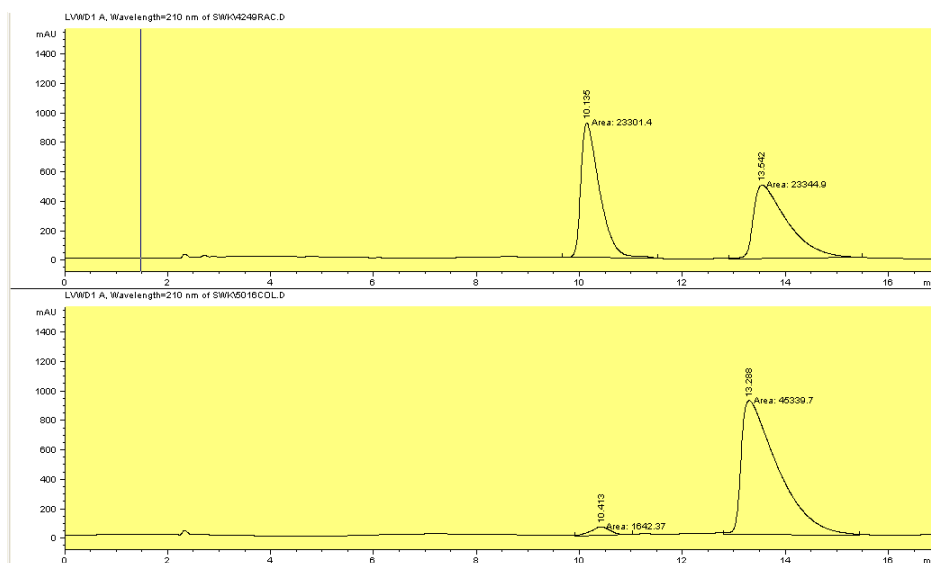

| Peak # | RT [min] | Area (mAU*sec) | Area [%] |
|--------|----------|----------------|----------|
| 1      | 10.1     | 1642.37        | 3.5      |
| 2      | 13.3     | 45339.7        | 96.5     |

### SFC Analysis of 14b

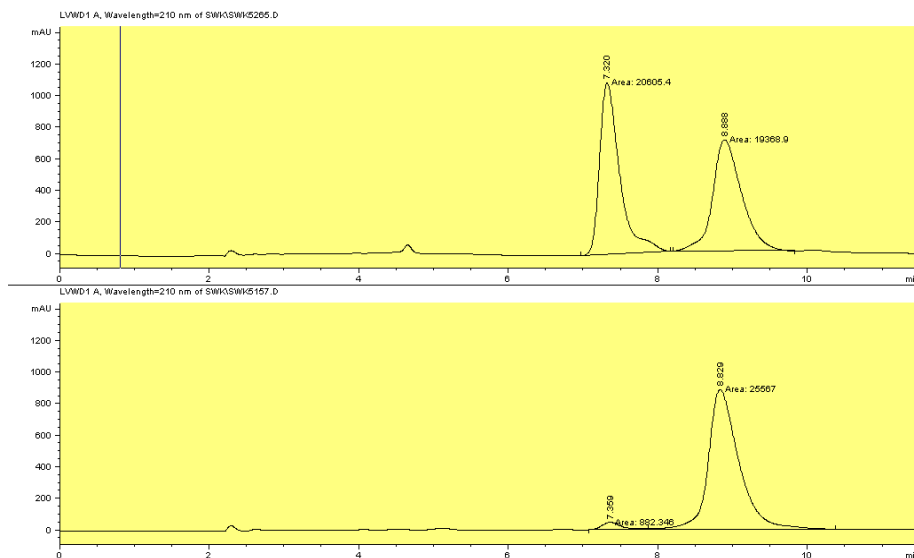

| Peak # | RT [min] | Area (mAU*sec) | Area [%] |
|--------|----------|----------------|----------|
| 1      | 7.4      | 882.346        | 3.3      |
| 2      | 8.8      | 25567.0        | 96.7     |

## SFC Analysis of 14c

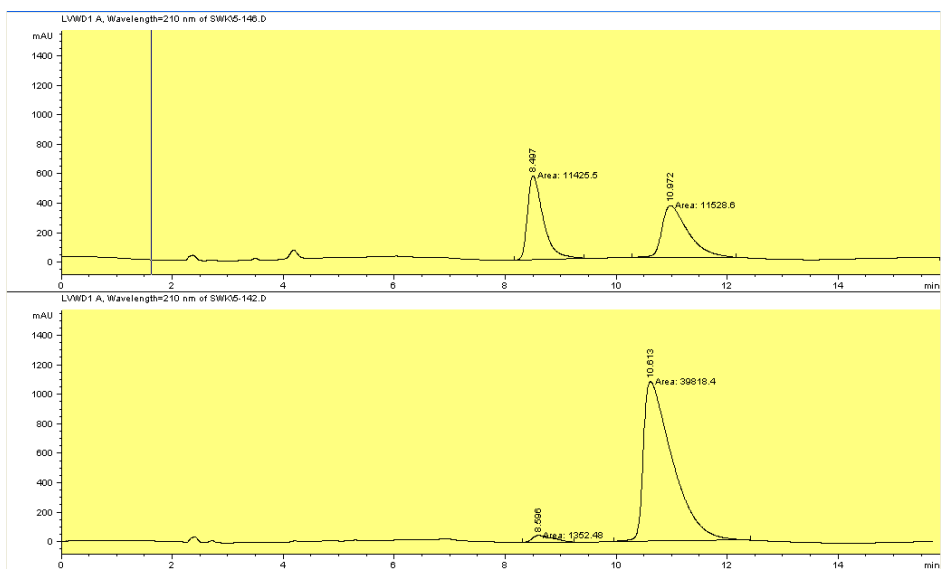

| Peak # | RT [min] | Area (mAU*sec) | Area [%] |
|--------|----------|----------------|----------|
| 1      | 8.6      | 1352.48        | 3.3      |
| 2      | 10.6     | 39818.4        | 96.7     |

## SFC Analysis of 14d

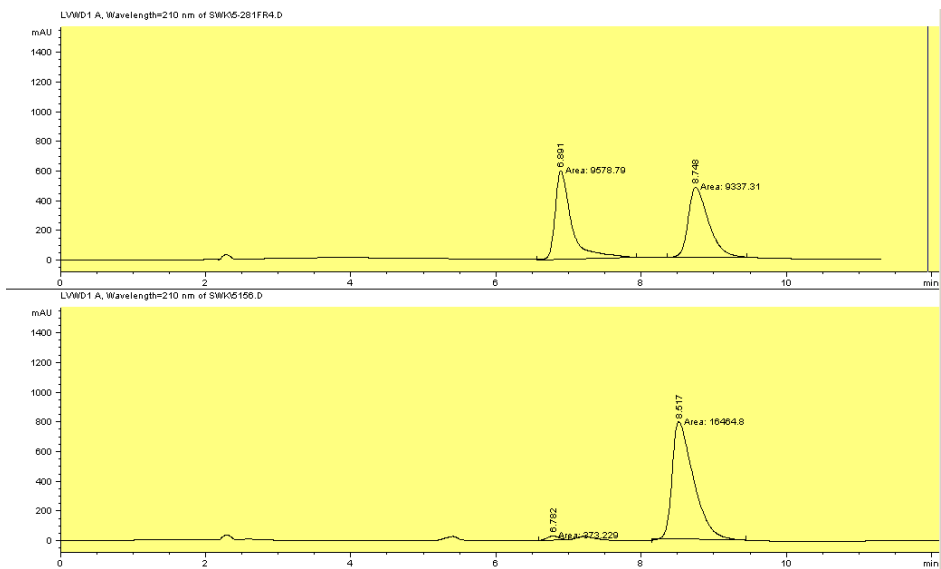

| Peak # | RT [min] | Area (mAU*sec) | Area [%] |
|--------|----------|----------------|----------|
| 1      | 6.8      | 373.229        | 2.2      |
| 2      | 8.5      | 16464.8        | 97.8     |

# HPLC Analysis of 4

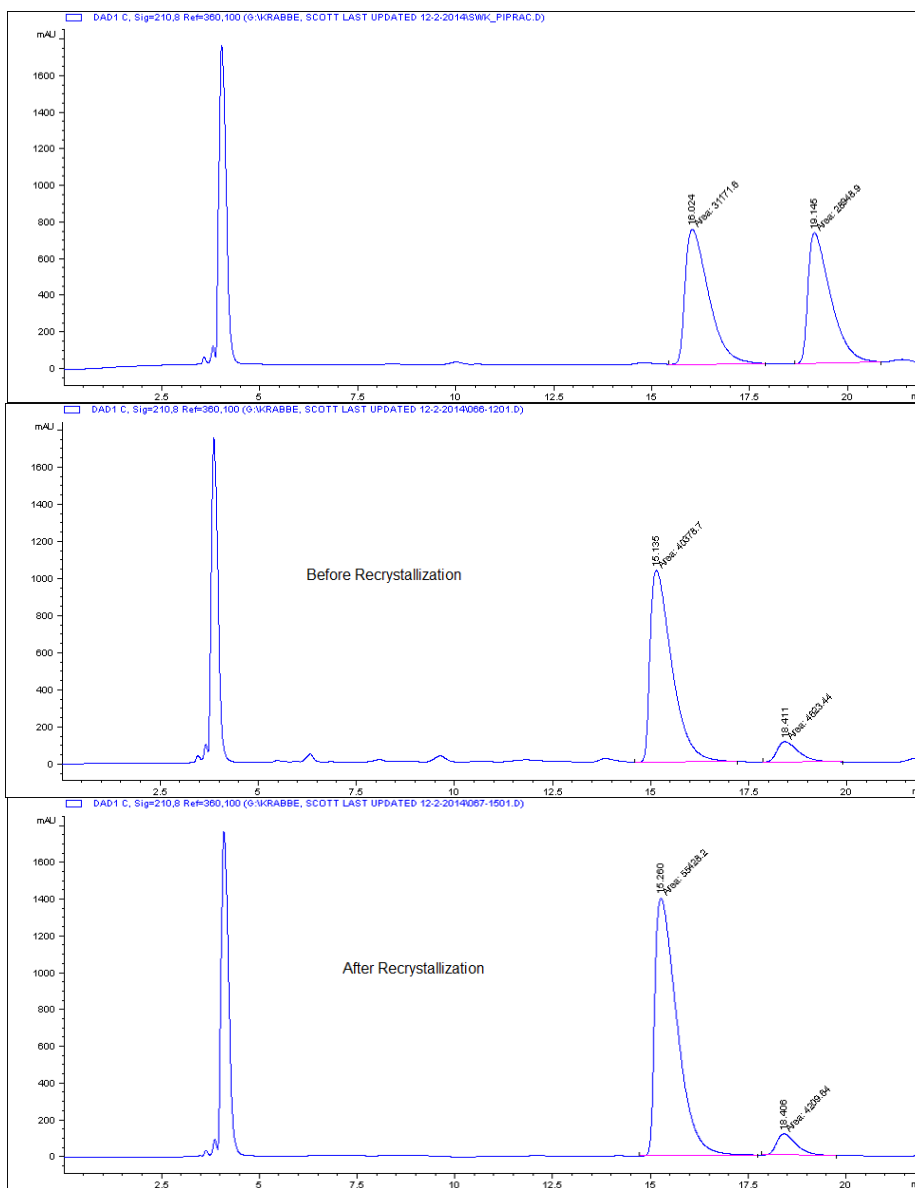

| <b>Before Recrystallization</b> |                 |                       |                 |
|---------------------------------|-----------------|-----------------------|-----------------|
| <b>Peak #</b>                   | <b>RT [min]</b> | <b>Area (mAU*sec)</b> | <b>Area [%]</b> |
| 1                               | 15.1            | 40378.7               | 89.7            |
| 2                               | 18.4            | 4623.44               | 10.3            |
| <b>After Recrystallization</b>  |                 |                       |                 |
| <b>Peak #</b>                   | <b>RT [min]</b> | <b>Area (mAU*sec)</b> | <b>Area [%]</b> |
| 1                               | 15.3            | 55428.2               | 92.9            |
| 2                               | 18.4            | 4209.64               | 7.1             |
